# Supplementary material
Source: publisher figshare collection journal article supplement (https://acs.figshare.com/ndownloader/files/12455405)
Supplement: Supplementary file 1 [file 12455405]

*Supporting information for*

**Trisulfur Radical Anion ( $S_3^{\cdot-}$ ) Involved [1+2+2] and [1+3+1] Cycloaddition with Aromatic Alkynes: Synthesis of Tetraphenylthiophene and 2-Benzylidenetetrahydrothiophene Derivatives**

Jing-Hao Li, Qi Huang, Shun-Yi Wang,<sup>\*</sup> and Shun-Jun Ji<sup>\*</sup>

Key Laboratory of Organic Synthesis of Jiangsu Province, College of Chemistry, Chemical Engineering and Materials Science & Collaborative Innovation Center of Suzhou Nano Science and Technology, Soochow University, Suzhou, 215123, China.

E-mail: shunyi@suda.edu.cn; shunjun@suda.edu.cn

## Table of Contents

|                                                                                                                               |     |
|-------------------------------------------------------------------------------------------------------------------------------|-----|
| 1. General Information.....                                                                                                   | S3  |
| 2. Synthesis of tetraphenylthiophene <b>3a</b> .....                                                                          | S3  |
| 3. Synthesis of 1,2,3,4-Tetraphenylnaphthalene <b>4</b> .....                                                                 | S3  |
| 4. Synthesis of 2-benzylidenetetrahydrothiophene <b>6a</b> and<br>(Z)-2-benzylidenetetrahydrothiophene 1-oxide <b>7</b> ..... | S4  |
| 5. Screenings of two Reactions' Conditions.....                                                                               | S5  |
| 6. Radical-trapping experiments.....                                                                                          | S6  |
| 7. Investigation of the Hydrogen Source in [1+3+1] cycloaddition<br>Reaction.....                                             | S6  |
| 8. ESR Experiments.....                                                                                                       | S7  |
| 9. Spectroscopic Data of Compounds.....                                                                                       | S8  |
| 10. Unsuccessful examples.....                                                                                                | S17 |
| 11. Copies of <sup>1</sup> H NMR and <sup>13</sup> C NMR Spectra for Compounds.....                                           | S18 |
| 12. X-ray Structure of <b>3a</b> and <b>7</b> .....                                                                           | S50 |

## 1. General Information

Unless otherwise noted, all commercially available compounds were used as provided without further purification. Solvents for chromatography were analytical grade and used without further purification. Analytical thin-layer chromatography (TLC) was performed on silica gel, visualized by irradiation with UV light. For column chromatography, 300-400 mesh silica gel was used.  $^1\text{H}$ -NMR and  $^{13}\text{C}$ -NMR were recorded on a BRUKER 400 MHz spectrometer in  $\text{CDCl}_3$  or  $\text{DMSO}-d_6$ . Chemical shifts ( $\delta$ ) were reported referenced to an internal tetramethylsilane standard or the  $\text{CDCl}_3$  residual peak ( $\delta$  7.26) or  $\text{DMSO}-d_6$  residual peak ( $\delta$  2.50) for  $^1\text{H}$  NMR. Chemical shifts of  $^{13}\text{C}$  NMR are reported relative to  $\text{CDCl}_3$  ( $\delta$  77.16) or  $\text{DMSO}-d_6$  ( $\delta$  39.52). Data are reported in the following order: chemical shift ( $\delta$ ) in ppm; multiplicities are indicated s (singlet), bs (broad singlet), d (doublet), t (triplet), m (multiplet); coupling constants (J) are in Hertz (Hz). Melting points were measured on an Electrothermal digital melting point apparatus and were uncorrected. IR spectra were recorded on a BRUKER VERTEX 70 spectrophotometer and are reported in terms of frequency of absorption ( $\text{cm}^{-1}$ ). HRMS spectra were obtained by using BRUKER MICROTOF-Q III instrument with EI source. ESR spectra were detected by JES-X320 electron spin-resonance instrument.

## 2. Synthesis of tetraphenylthiophene 3a

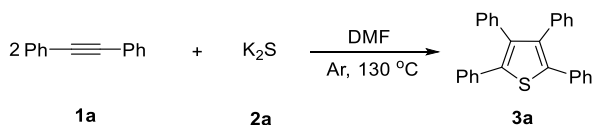

A mixture of 1,2-diphenylethyne **1a** (0.60 mmol) and  $\text{K}_2\text{S}$  **2a** (0.60 mmol) in 2.5 mL dry DMF was stirred under an Ar atmosphere at 130  $^\circ\text{C}$  for 12 h. After completion of the reaction, as indicated by TLC, water (10 mL) was added, and the solution was extracted with ethyl acetate ( $3 \times 15$  mL). The organic layers were combined, and dried over sodium sulfate. The pure product was obtained by flash column chromatography using n-hexane on silica gel to afford **3a** in 69% yield. All remaining Polyaryl-substituted thiophenes (except **3j'**, **3k**, **3l**) were prepared using a procedure similar to that used to synthesize **3a**. The **3j'** was purified by flash column chromatography (hexane/EtOAc = 4:1) and The **3k** and **3l** were purified by flash column chromatography ( $\text{CH}_2\text{Cl}_2/\text{CH}_3\text{OH} = 15:1$ ) to afford pure product.

## 3. Synthesis of 1,2,3,4-Tetraphenylnaphthalene 4

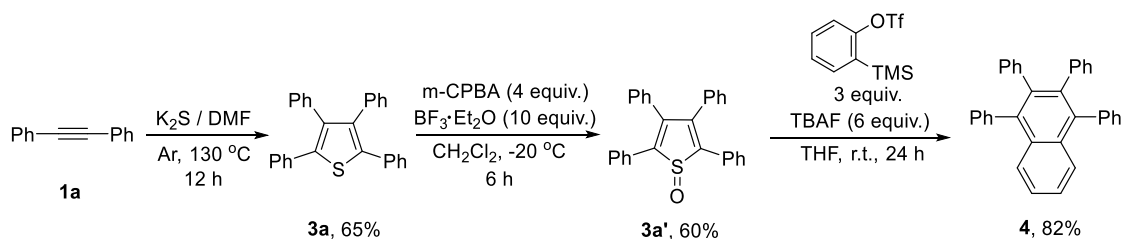

A 50-mL two-necked flask, containing a magnetic stirring bar, was flame-dried under vacuum and filled with argon after cooling to room temperature. To this flask were added 1,2-diphenylethyne **1a** (356mg, 2.0 mmol) and  $\text{K}_2\text{S}$  **2a** (221mg, 2.0 mmol), dry DMF (8 mL) under a stream of argon. The flask was

heated at 130 °C for 12 h. After cooling the reaction mixture to room temperature, the mixture was extracted with ethyl acetate, dried over with Na<sub>2</sub>SO<sub>4</sub>, and concentrated under reduced pressure. The residue was purified by flash column chromatography using n-hexane on silica gel to afford tetraphenylthiophene **3a** (253mg, 65% yield) as a white solid.

A 50-mL two-necked flask, containing a magnetic stirring bar, was flame-dried under vacuum and filled with Argon after cooling to room temperature. To this flask were tetraphenylthiophene **3a** (253 mg, 0.65 mmol, 1.0 equiv) and dry CH<sub>2</sub>Cl<sub>2</sub> (3.0 mL). After cooling to –20 °C, BF<sub>3</sub>·OEt<sub>2</sub> (816 µL, 6.5 mmol, 10 equiv) was added under a stream of Argon. After stirring the mixture at –20 °C for 1 h, a solution of m-CPBA (0.65 mmol, 1.0 equiv) in CH<sub>2</sub>Cl<sub>2</sub> (1.5 mL) was slowly added (four times every hour), and the resultant mixture was further stirred at –20 °C for 1 h. The reaction was quenched by adding saturated Na<sub>2</sub>S<sub>2</sub>O<sub>3</sub> aqueous solution and saturated NaHCO<sub>3</sub> aqueous solution. The mixture was extracted with CH<sub>2</sub>Cl<sub>2</sub>, dried over with Na<sub>2</sub>SO<sub>4</sub>, and concentrated under reduced pressure. The crude product was purified by flash column chromatography (CHCl<sub>3</sub>) to afford 2,3,4,5-tetraphenylthiophene 1-oxide **3a'** (158 mg, 60% yield) as a yellow solid.

A 25-mL screw cap tube, containing a magnetic stirring bar, was flame-dried under vacuum and filled with Argon after cooling to room temperature. To this tube were added **3a'** (162 mg, 0.4 mmol, 1.0 equiv), 2-(trimethylsilyl)phenyl trifluoromethanesulfonate (358 mg, 1.2 mmol, 3.0 equiv) and THF (2.0 mL) under a stream of nitrogen. Tetrabutylammonium fluoride (TBAF: 2.4 mL, 2.4 mmol, 6.0 equiv, 1M in THF) was slowly added. The reaction mixture was stirred at room temperature for 24 h. After adding water (20 mL) and CH<sub>2</sub>Cl<sub>2</sub> (20 mL) to the mixture, cooling the resultant was extracted with CH<sub>2</sub>Cl<sub>2</sub>. The organic layer was dried over Na<sub>2</sub>SO<sub>4</sub> and the volatiles were removed under reduced pressure. The volatiles were removed under reduced pressure. The residue was purified by flash column chromatography (hexane/EtOAc = 10:1) to afford 1,2,3,4-Tetraphenylnaphthalene **4** (142 mg, 82% yield) as a white solid.

#### 4. Synthesis of 2-benzylidenetetrahydrothiophene **6a** and (Z)-2-benzylidenetetrahydrothiophene 1-oxide **7**

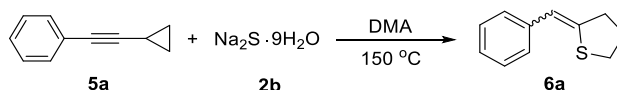

A mixture of (cyclopropylethynyl)benzene **5a** (0.50 mmol) and Na<sub>2</sub>S·9H<sub>2</sub>O **2b** (1.0 mmol) in 2.5 mL DMA was stirred at 150 °C for 9 h. After completion of the reaction, as indicated by TLC, water (10 mL) was added, and the solution was extracted with ethyl acetate (3 × 15 mL). The organic layers were combined, and dried over sodium sulfate. The pure product was obtained by flash column chromatography using n-hexane on silica gel to afford **6a** in 69% yield. All remaining 2-benzylidenetetrahydrothiophene were prepared using a procedure similar to that used to synthesize **6a**.

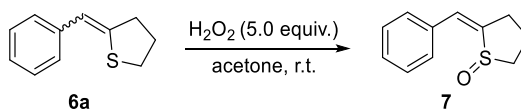

A 25-mL test tube which contains a magnetic stirring bar were added **6a** (88 mg, 0.5 mmol, 1.0 equiv), and acetone (3.0 mL). H<sub>2</sub>O<sub>2</sub> (2.5 mmol, 5.0 equiv, 30% in water) was slowly added at 0 °C. Then the reaction mixture was stirred at room temperature for 24 h. Water (10 mL) was added, and the solution was extracted with ethyl acetate (3 × 15 mL). The organic layer was dried over Na<sub>2</sub>SO<sub>4</sub> and the volatiles

were removed under reduced pressure. The volatiles were removed under reduced pressure. The residue was purified by flash column chromatography using ethyl acetate on silica gel to afford (Z)-2-benzylidenetetrahydrothiophene 1-oxide **7** (82 mg, 85% yield) as a white solid.

**<sup>1</sup>H NMR** (400 MHz, CDCl<sub>3</sub>) δ 7.64 (d, *J* = 7.1 Hz, 2H), 7.45 – 7.32 (m, 3H), 7.09 (s, 1H), 3.15 (dq, *J* = 8.3, 6.0, 4.4 Hz, 2H), 2.86 – 2.62 (m, 3H), 2.22 – 2.10 (m, 1H). **<sup>13</sup>C NMR** (100 MHz, CDCl<sub>3</sub>) δ 148.2, 135.9, 135.3, 129.2, 128.9, 128.7, 54.5, 33.3, 23.2.

## 5. Screenings of two Reactions' Conditions

**Table 1. Optimization of the cycloaddition reaction conditions**

| Entry | Sulfur reagents<br>(mmol)                            | Solvent<br>(2.5 mL) | Temperature<br>(°C) | LC-Yield <sup>b</sup><br>(%) |
|-------|------------------------------------------------------|---------------------|---------------------|------------------------------|
| 1     | K <sub>2</sub> S (0.36)                              | DMF                 | 120                 | 65(48) <sup>c</sup>          |
| 2     | Na <sub>2</sub> S·9H <sub>2</sub> O (0.36)           | DMF                 | 120                 | 36                           |
| 3     | S <sub>8</sub> +NaO <sup>t</sup> Bu (0.36)           | DMF                 | 120                 | trace                        |
| 4     | Na <sub>2</sub> S <sub>2</sub> O <sub>3</sub> (0.36) | DMF                 | 120                 | N.D                          |
| 5     | Thiourea(0.36)                                       | DMF                 | 120                 | N.D                          |
| 6     | K <sub>2</sub> S (0.36)                              | DMSO                | 120                 | 52                           |
| 7     | K <sub>2</sub> S (0.36)                              | DMA                 | 120                 | 40                           |
| 8     | K <sub>2</sub> S (0.36)                              | Toluene             | 120                 | trace                        |
| 9     | K <sub>2</sub> S (0.36)                              | H <sub>2</sub> O    | 120                 | N.D <sup>d</sup>             |
| 10    | K <sub>2</sub> S (0.36)                              | CH <sub>3</sub> CN  | 120                 | <10                          |
| 11    | K <sub>2</sub> S (0.36)                              | DMF                 | r.t.                | N.D                          |
| 12    | K <sub>2</sub> S (0.36)                              | DMF                 | 80                  | N.D                          |
| 13    | K <sub>2</sub> S (0.36)                              | DMF                 | 110                 | 49                           |
| 14    | K <sub>2</sub> S (0.36)                              | DMF                 | 130                 | 70(63) <sup>c</sup>          |
| 15    | K <sub>2</sub> S (0.36)                              | DMF                 | 140                 | 68                           |
| 16    | K <sub>2</sub> S (0.36)                              | DMF                 | 150                 | 69                           |
| 17    | K <sub>2</sub> S (0.45)                              | DMF                 | 130                 | 73                           |
| 18    | K <sub>2</sub> S (0.6)                               | DMF                 | 130                 | 78(69) <sup>c</sup>          |
| 19    | K <sub>2</sub> S (0.9)                               | DMF                 | 130                 | 78                           |
| 20    | K <sub>2</sub> S (1.2)                               | DMF                 | 130                 | 77                           |

<sup>a</sup>Reaction Conditions: **1a** (0.6 mmol), Sulfur reagents (X mmol), solvent (2.5 mL) under argon atmosphere for 12 h. <sup>b</sup>The yields were determined by LC analysis using biphenyl as the internal standard.

<sup>c</sup>Isolated yields. <sup>d</sup>N.D. = no target product detected.

**Table 2. Optimization of the ring expansion reaction conditions**

| Entry | Sulfur reagents<br>(equiv.)                         | Solvent<br>(2.5 mL) | Temperature<br>(°C) | LC-Yield <sup>b</sup><br>(%) |
|-------|-----------------------------------------------------|---------------------|---------------------|------------------------------|
| 1     | K <sub>2</sub> S (2.0) <sup>c</sup>                 | DMF                 | 130                 | 48(35) <sup>c</sup>          |
| 2     | K <sub>2</sub> S (2.0)                              | DMF                 | 130                 | 60                           |
| 3     | Na <sub>2</sub> S·9H <sub>2</sub> O (2.0)           | DMF                 | 130                 | 67(56) <sup>c</sup>          |
| 4     | S <sub>8</sub> +NaO <sup>t</sup> Bu (2.0)           | DMF                 | 130                 | trace                        |
| 5     | Na <sub>2</sub> S <sub>2</sub> O <sub>3</sub> (2.0) | DMF                 | 130                 | N.D                          |
| 6     | Thiourea(2.0)                                       | DMF                 | 130                 | N.D                          |

|    |                                           |                  |     |                     |
|----|-------------------------------------------|------------------|-----|---------------------|
| 7  | Na <sub>2</sub> S·9H <sub>2</sub> O (2.0) | DMSO             | 130 | 40                  |
| 8  | Na <sub>2</sub> S·9H <sub>2</sub> O (2.0) | DMA              | 130 | trace               |
| 9  | Na <sub>2</sub> S·9H <sub>2</sub> O (2.0) | toluene          | 130 | N.D                 |
| 10 | Na <sub>2</sub> S·9H <sub>2</sub> O (2.0) | DMA              | 140 | 73                  |
| 11 | Na <sub>2</sub> S·9H <sub>2</sub> O (2.0) | DMA              | 150 | 79(69) <sup>c</sup> |
| 12 | Na <sub>2</sub> S·9H <sub>2</sub> O (2.0) | DMA              | 160 | 70                  |
| 13 | Na <sub>2</sub> S·9H <sub>2</sub> O (2.0) | NMP <sup>f</sup> | 160 | N.D                 |
| 14 | Na <sub>2</sub> S·9H <sub>2</sub> O (2.0) | Mesitylene       | 170 | N.D                 |
| 15 | Na <sub>2</sub> S·9H <sub>2</sub> O (1.5) | DMA              | 150 | 71                  |
| 16 | Na <sub>2</sub> S·9H <sub>2</sub> O (3.0) | DMA              | 150 | 79                  |

<sup>a</sup>Reaction Conditions: **5a** (0.5 mmol), **Sulfur reagents** (X equiv.), solvent (2.5 mL) for 9 h. <sup>b</sup>The yields were determined by LC analysis using biphenyl as the internal standard. <sup>c</sup>Isolated yields. <sup>d</sup>N.D. = no target product detected. <sup>e</sup>The reaction was conducted under argon atmosphere. <sup>f</sup>NMP = 1-Methyl-2-pyrrolidinone.

## 6. Radical-trapping experiments

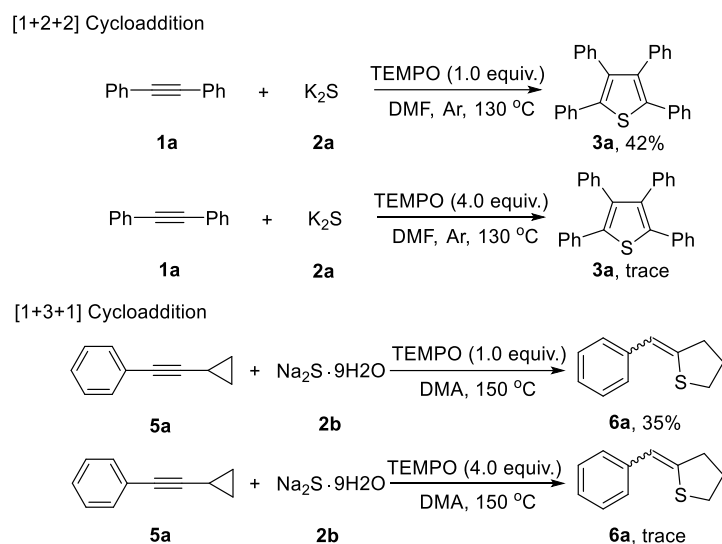

## 7. Investigation of the Hydrogen Source in [1+3+1] cycloaddition

### Reaction

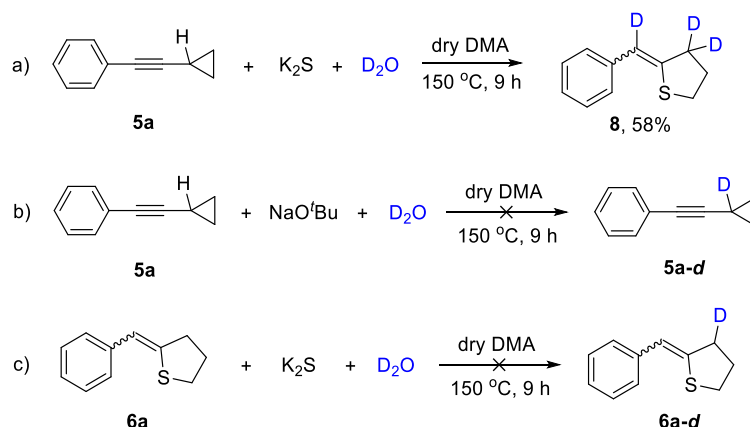

As shown as above, 2-(phenylmethylene-*d*)tetrahydrothiophene-3,3-*d*<sub>2</sub> **8** was formed in 58% yield when Na<sub>2</sub>S 9H<sub>2</sub>O was replaced by K<sub>2</sub>S and D<sub>2</sub>O. This result indicated that water was the hydrogen donor in the transformation. Then, The other two experiments showed that the reaction product **8** was achieved by the following reaction pathway.

**<sup>1</sup>H NMR** (400 MHz, CDCl<sub>3</sub>) δ 7.43 (dd, *J* = 8.3, 1.3 Hz, 1H), 7.38 – 7.27 (m, 2H), 7.25 – 7.10 (m, 2H), 6.46 (d, *J* = 19.3 Hz, 0.13H), 3.13 (dt, *J* = 45.6, 6.4 Hz, 2H), 2.87 – 2.67 (m, 0.37H), 2.07 (dt, *J* = 40.7, 6.4 Hz, 2H).

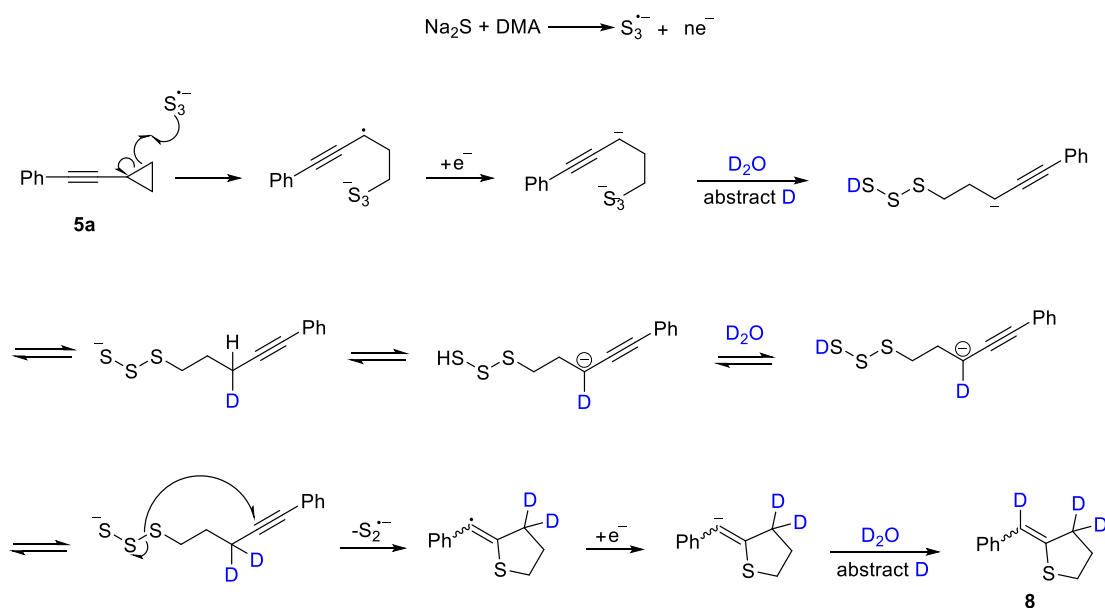

## 8. ESR Experiments

### EPR Studies of Interaction between Na<sub>2</sub>S·9H<sub>2</sub>O and different solvents

Five dried tubes equipped with a stir bar were respectively loaded with Na<sub>2</sub>S·9H<sub>2</sub>O (1.0 mmol) in 2.5 mL DMSO, DMF, DMA, NMP and Mesitylene. They were all stirred at 25 °C. After 2 h, the solution samples were taken by five 0.3mm glass capillaries and analyzed by ESR. ESR spectra was recorded at room temperature on ESR spectrometer operated at 9150.300 MHz. Typical spectrometer parameters are shown as follows, Mod freq = 100 kHz, width = 0.5000 mT; Field center = 325.571.000 mT, width = +/-15.000 mT; Sweep time = 30 s.

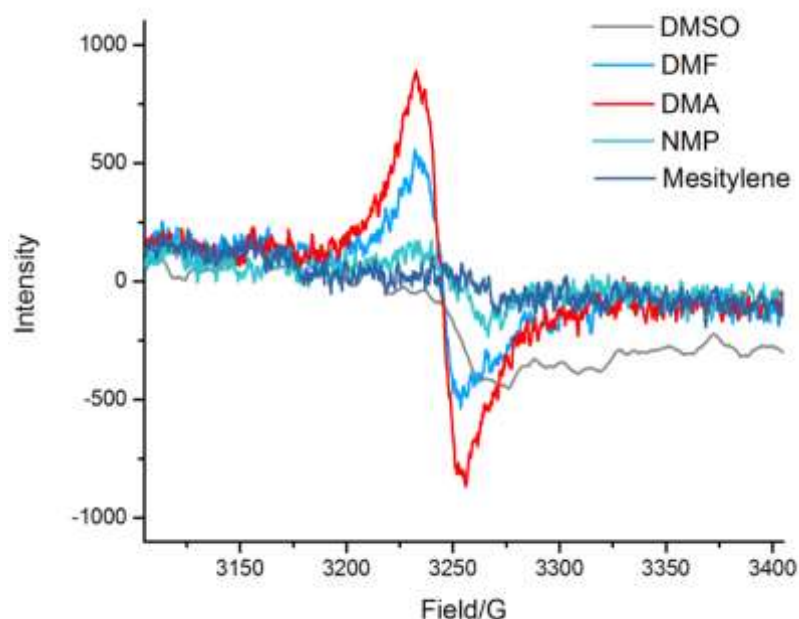

**Figure 1.** EPR spectra of solutions of  $\text{Na}_2\text{S}\cdot 9\text{H}_2\text{O}$  (1.0 mmol) in various solvents (2.5 mL) at 298 K.

## 9. Spectroscopic Data of Compounds

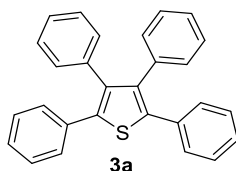

### 2,3,4,5-tetraphenylthiophene (3a)

Yield = 69% (80.4 mg). White solid. Mp: 178.5–180.3 °C.  $^1\text{H}$  NMR (400 MHz,  $\text{CDCl}_3$ )  $\delta$  7.25 – 7.18(m, 10H), 7.14 – 7.08 (m, 6H), 6.96 (dd,  $J$  = 7.8, 1.5 Hz, 4H).  $^{13}\text{C}$  NMR (100 MHz,  $\text{CDCl}_3$ )  $\delta$  139.6, 138.7, 136.6, 134.4, 131.0, 129.4, 128.4, 128.0, 127.4, 126.7. IR (ATR):  $\nu$  = 2923, 1596, 1494, 1441, 1030, 916, 793, 748, 706, 693  $\text{cm}^{-1}$ ; HRMS (EI): calcd. for  $\text{C}_{28}\text{H}_{20}\text{S}$   $[\text{M}+\text{H}]^+$ : 389.1364, found: 389.1358.

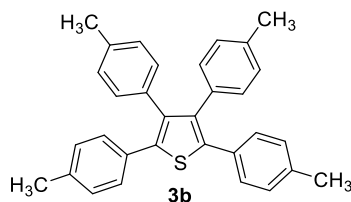

### 2,3,4,5-tetra-p-tolylthiophene (3b)

Yield = 81% (108.0 mg). Pale brown solid. Mp: 220.0–221.9 °C.  $^1\text{H}$  NMR (400 MHz,  $\text{CDCl}_3$ )  $\delta$  7.12 (d,  $J$  = 7.9 Hz, 4H), 7.01 (d,  $J$  = 8.0 Hz, 4H), 6.91 (d,  $J$  = 7.9 Hz, 4H), 6.84 (d,  $J$  = 7.8 Hz, 4H), 2.29 (s, 6H), 2.26 (s, 6H).  $^{13}\text{C}$  NMR (100 MHz,  $\text{CDCl}_3$ )  $\delta$  139.2, 138.1, 136.9, 136.0, 133.8, 131.8, 130.8, 129.1(5), 129.1(2), 128.7, 21.3(8), 21.3(1). IR (ATR):  $\nu$  = 2920, 1514, 1495, 1182, 1019, 833, 733, 685  $\text{cm}^{-1}$ ; HRMS (EI): calcd. for  $\text{C}_{32}\text{H}_{28}\text{S}$   $[\text{M}+\text{H}]^+$ : 445.1990, found: 445.1989.



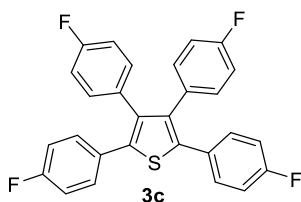

**2,3,4,5-tetrakis(4-fluorophenyl)thiophene (3c)**

Yield = 28% (38.7 mg). White solid. **Mp**: 175.9–177.0 °C. **<sup>1</sup>H NMR** (400 MHz, CDCl<sub>3</sub>) δ 7.22 – 7.12 (m, 4H), 6.98 – 6.79 (m, 12H). **<sup>13</sup>C NMR** (100 MHz, CDCl<sub>3</sub>) δ 163.5, 163.1, 161.1, 160.7, 138.4, 137.8, 132.5, 132.4, 132.1, 132.0, 131.1, 131.0, 130.0(3), 129.9(9), 115.8, 115.6, 115.4, 115.2. **IR (ATR)**: ν = 2921, 1602, 1491, 1220, 1160, 1013, 812, 547, 513 cm<sup>-1</sup>; **HRMS** (EI): calcd. for C<sub>28</sub>H<sub>16</sub>F<sub>4</sub>S [M+H]<sup>+</sup>: 461.0987, found: 461.0975.

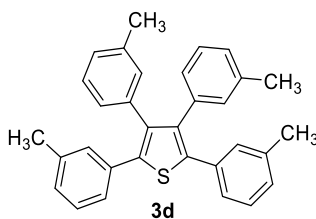

**2,3,4,5-tetra-m-tolylthiophene (3d)**

Yield = 86% (114.7 mg). Brown solid. **<sup>1</sup>H NMR** (400 MHz, CDCl<sub>3</sub>) δ 7.16 (d, *J* = 1.9 Hz, 2H), 7.11 – 6.93 (m, 10H), 6.80 (d, *J* = 8.8 Hz, 4H), 2.27 (s, 6H), 2.16 (s, 6H). **<sup>13</sup>C NMR** (100 MHz, CDCl<sub>3</sub>) δ 139.8, 138.3, 137.9, 137.2, 136.7, 134.4, 131.7, 129.9, 128.2, 128.0(4), 127.9(5), 127.6, 127.3, 126.3, 21.5, 21.4. **IR (ATR)**: ν = 2918, 1601, 1451, 1091, 882, 779, 692, 483 cm<sup>-1</sup>; **HRMS** (EI): calcd. for C<sub>32</sub>H<sub>28</sub>S [M+H]<sup>+</sup>: 445.1990, found: 445.1981.

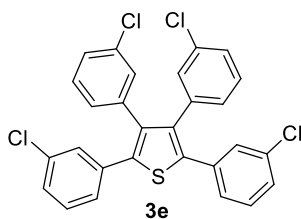

**2,3,4,5-tetrakis(3-chlorophenyl)thiophene (3e)**

Yield = 73% (115.3 mg). Reddish brown solid. **Mp**: 49.3–52.8 °C. **<sup>1</sup>H NMR** (400 MHz, CDCl<sub>3</sub>) δ 7.28 – 7.01 (m, 12H), 6.95 (t, *J* = 1.8 Hz, 2H), 6.84 (dt, *J* = 7.7, 1.4 Hz, 2H). **<sup>13</sup>C NMR** (100 MHz, CDCl<sub>3</sub>) δ 138.5, 138.3, 137.4, 135.2, 134.5, 134.1, 130.6, 129.8, 129.6, 129.2, 129.0, 128.0, 127.6, 127.4. **IR (ATR)**: ν = 2922, 1561, 1465, 1260, 1077, 883, 775, 697, 441 cm<sup>-1</sup>; **HRMS** (EI): calcd. for C<sub>28</sub>H<sub>16</sub>Cl<sub>4</sub>S [M+H]<sup>+</sup>: 524.9805, found: 524.9789.

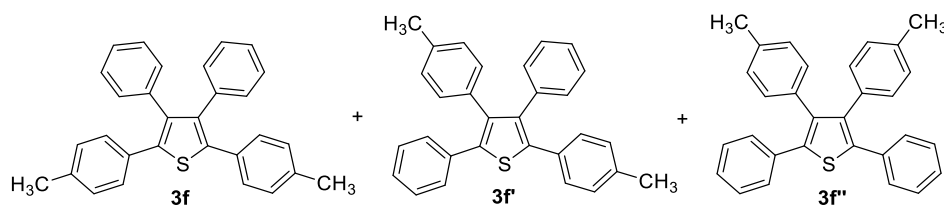

**Mixture of 3,4-diphenyl-2,5-di-p-tolylthiophene (3f) and 2,4-diphenyl-3,5-di-p-tolylthiophene (3f') and 2,5-diphenyl-3,4-di-p-tolylthiophene (3f'')**

Total yield = 51% (63.7 mg). White solid.  $^1\text{H NMR}$  (400 MHz,  $\text{CDCl}_3$ )  $\delta$  7.26 – 7.17 (m, 5H), 7.14 – 7.06 (m, 5H), 7.04 – 6.93 (m, 4H), 6.90 (dd,  $J$  = 7.8, 5.1 Hz, 2H), 6.86 – 6.81 (m, 2H), 2.28 (s, 3H), 2.24 (d,  $J$  = 4.9 Hz, 3H).  $^{13}\text{C NMR}$  (100 MHz,  $\text{CDCl}_3$ )  $\delta$  139.6, 139.5(5), 139.3, 139.2, 138.8, 138.4(4), 138.3(7), 138.0, 137.0(9), 137.0(7), 136.8(8), 136.8(2), 136.1(8), 136.1(5), 134.6(2), 134.6(1), 133.5(9), 133.5(4), 131.5, 131.0(3), 131.0(1), 130.8(2), 130.8(0), 129.3(4), 129.3(3), 129.2, 128.7(2), 128.7(0), 128.4, 127.9(4), 127.9(3), 127.2, 127.1(8), 126.6(1), 126.6(0), 21.3(7), 21.3(4), 21.3(0). **IR (ATR):**  $\nu$  = 2919, 1672, 1542, 1484, 1181, 1072, 814, 751, 694  $\text{cm}^{-1}$ ; **HRMS** (EI): calcd. for  $\text{C}_{30}\text{H}_{24}\text{S}$   $[\text{M}+\text{H}]^+$ : 417.1677, found: 417.1678.

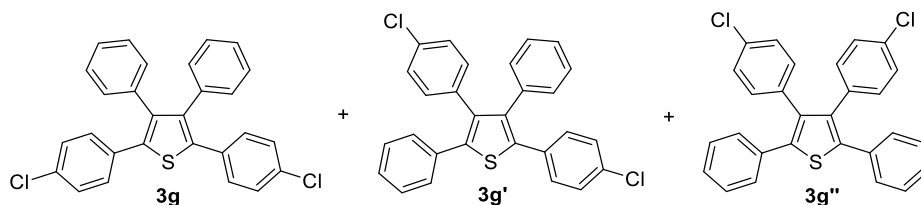

**Mixture of 2,5-bis(4-chlorophenyl)-3,4-diphenylthiophene (3g) and 2,4-bis(4-chlorophenyl)-3,5-diphenylthiophene (3g') and 3,4-bis(4-chlorophenyl)-2,5-diphenylthiophene (3g'')**

Total yield = 70% (96.1 mg). White solid.  $^1\text{H NMR}$  (400 MHz,  $\text{CDCl}_3$ )  $\delta$  7.26 – 7.04 (m, 14H), 6.93 (dd,  $J$  = 7.6, 1.8 Hz, 2H), 6.86 (dd,  $J$  = 8.4, 1.0 Hz, 2H).  $^{13}\text{C NMR}$  (100 MHz,  $\text{CDCl}_3$ )  $\delta$  140.1, 139.7, 139.4(1), 139.3(9), 138.2, 137.8, 137.5, 136.0(8), 136.0(3), 134.8, 134.7(6), 133.8(6), 133.8(5), 133.4(3), 133.4(1), 133.0, 132.8, 132.6(9), 132.6(8), 132.2, 130.8, 130.5, 129.4, 128.7, 128.6, 128.5, 128.3(2), 128.3(1), 128.2, 127.7(1), 127.6(9), 127.2, 127.0. **IR (ATR):**  $\nu$  = 2920, 1597, 1541, 1182, 1073, 833, 749, 696  $\text{cm}^{-1}$ ; **HRMS** (EI): calcd. for  $\text{C}_{28}\text{H}_{28}\text{Cl}_2\text{S}$   $[\text{M}+\text{H}]^+$ : 457.0585, found: 457.0578.

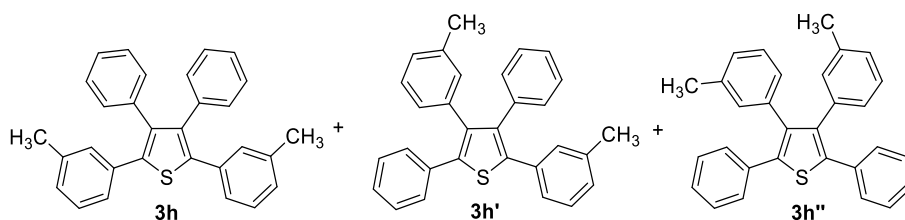

**Mixture of 3,4-diphenyl-2,5-di-m-tolylthiophene (3h) and 2,4-diphenyl-3,5-di-m-tolylthiophene (3h') and 2,5-diphenyl-3,4-di-m-tolylthiophene (3h'')**

Total yield = 26% (32.5 mg). White solid.  $^1\text{H NMR}$  (400 MHz,  $\text{CDCl}_3$ )  $\delta$  7.28 – 7.04 (m, 10H), 7.02 – 6.88 (m, 6H), 6.76 (d,  $J$  = 6.9 Hz, 2H), 2.22 (s, 3H), 2.10 (d,  $J$  = 3.4 Hz, 3H).  $^{13}\text{C NMR}$  (100 MHz,  $\text{CDCl}_3$ )  $\delta$  139.8, 139.6(9), 139.6(2), 139.5, 138.7(2), 138.6(6), 138.3(6), 138.3(1), 138.0, 137.3, 137.2, 136.7(8), 136.7(3), 136.5(0), 136.4(6), 134.5(2), 134.5(0), 134.3, 131.7, 130.9(7), 130.9(6), 130.0, 129.2, 128.4, 128.2, 128.0(7), 128.0(4), 127.9(0), 127.8(5), 127.7(5), 127.7, 127.4(1), 127.3(8), 127.2, 126.6(4),

126.6(2), 126.4, 21.5, 21.4. **IR (ATR):**  $\nu$  = 2924, 1742, 1601, 1442, 906, 751, 693, 440  $\text{cm}^{-1}$ ; **HRMS** (EI): calcd. for  $\text{C}_{30}\text{H}_{24}\text{S}$   $[\text{M}+\text{H}]^+$ : 417.1677, found: 417.1678.

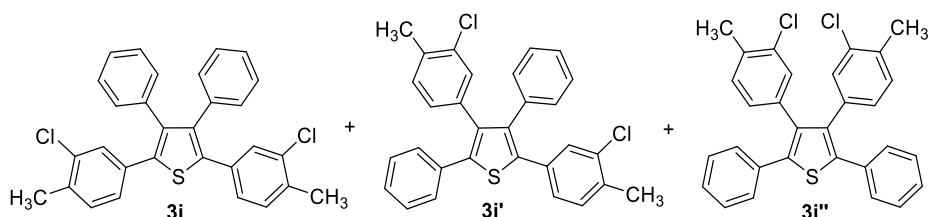

**Mixture of 2,5-bis(3-chloro-4-methylphenyl)-3,4-diphenylthiophene (3i) and 2,4-bis(3-chloro-4-methylphenyl)-3,5-diphenylthiophene (3i') and 3,4-bis(3-chloro-4-methylphenyl)-2,5-diphenylthiophene (3i'')**

Total yield = 75% (109.2 mg). White solid.  **$^1\text{H}$  NMR** (400 MHz,  $\text{CDCl}_3$ )  $\delta$  7.43 – 7.24 (m, 9H), 7.20 – 7.02 (m, 6H), 6.95 – 6.84 (m, 1H), 2.54 – 2.31 (m, 6H).  **$^{13}\text{C}$  NMR** (100 MHz,  $\text{CDCl}_3$ )  $\delta$  140.0, 139.8, 139.2, 137.9, 137.7, 137.1(8), 137.1(6), 136.1(4), 136.0(8), 135.4(8), 135.4(4), 135.1(2), 135.0(9), 134.5, 134.3(8), 134.3(6), 133.9(2), 133.8(9), 133.8(8), 133.8(3), 133.4, 131.2(1), 131.1(9), 130.9, 130.7(8), 130.7(6), 130.6, 130.4(8), 129.4(6), 129.2(7), 129.2(4), 129.1(8), 128.5, 128.2, 128.1, 127.6(2), 127.5(8), 127.3(6), 127.3(5), 127.1, 127.0, 19.8(9), 19.8(7), 19.8(6). **IR (ATR):**  $\nu$  = 2921, 1599, 1479, 1050, 882, 818, 753, 694, 442  $\text{cm}^{-1}$ ; **HRMS** (EI): calcd. for  $\text{C}_{30}\text{H}_{22}\text{Cl}_2\text{S}$   $[\text{M}+\text{H}]^+$ : 485.0898, found: 485.0888.

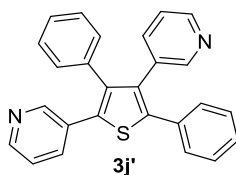

**3,3'-(3,5-diphenylthiophene-2,4-diyl)dipyridine (3j')**

Yield = 51% (59.7 mg). Yellow solid. Mp: 158.2-160.2  $^{\circ}\text{C}$ .  **$^1\text{H}$  NMR** (400 MHz,  $\text{CDCl}_3$ )  $\delta$  8.55 (d,  $J$  = 2.2 Hz, 1H), 8.45 (dd,  $J$  = 4.8, 1.6 Hz, 1H), 8.38 (dd,  $J$  = 4.9, 1.7 Hz, 1H), 8.23 (d,  $J$  = 2.1 Hz, 1H), 7.46 (dt,  $J$  = 8.0, 2.0 Hz, 1H), 7.25 (dq,  $J$  = 5.8, 3.6, 3.1 Hz, 6H), 7.20 – 7.11 (m, 4H), 7.05 (dd,  $J$  = 7.9, 4.8 Hz, 1H), 6.96 (dd,  $J$  = 7.5, 2.1 Hz, 2H).  **$^{13}\text{C}$  NMR** (100 MHz,  $\text{CDCl}_3$ )  $\delta$  151.3, 149.7, 148.4, 147.9, 141.2, 140.7, 138.2, 136.3, 135.8, 135.2, 135.1, 133.3, 132.2, 130.8, 130.2, 129.5, 128.8, 128.6, 128.1, 127.6, 123.2, 122.9. **IR (ATR):**  $\nu$  = 2921, 1562, 1403, 1260, 1073, 1021, 798, 757, 700, 593  $\text{cm}^{-1}$ ; **HRMS** (EI): calcd. for  $\text{C}_{26}\text{H}_{18}\text{N}_2\text{S}$   $[\text{M}+\text{H}]^+$ : 391.1269, found: 391.1276.

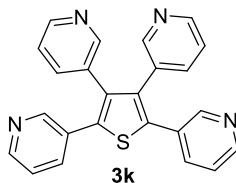

**3,3',3'',3'''-(thiophene-2,3,4,5-tetrayl)tetrapiyridine (3k)**

Yield = 83% (97.7 mg). Yellow solid. Mp: 153.2-155.3  $^{\circ}\text{C}$ .  **$^1\text{H}$  NMR** (300 MHz,  $\text{CDCl}_3$ )  $\delta$  8.50 – 8.28 (m, 6H), 8.16 (d,  $J$  = 2.2 Hz, 2H), 7.42 (dt,  $J$  = 8.0, 2.0 Hz, 2H), 7.23 – 6.99 (m, 6H).  **$^{13}\text{C}$  NMR** (75 MHz,  $\text{CDCl}_3$ )  $\delta$  150.9, 149.6, 149.0, 148.6, 137.8, 137.4, 136.8, 136.3, 130.8, 129.0, 123.3, 123.2. **IR**

(ATR):  $\nu = 2923, 1562, 1479, 1405, 1181, 1022, 794, 710, 616 \text{ cm}^{-1}$ ; HRMS (EI): calcd. for  $\text{C}_{24}\text{H}_{16}\text{N}_4\text{S}$   $[\text{M}+\text{H}]^+$ : 393.1174, found: 393.1180.

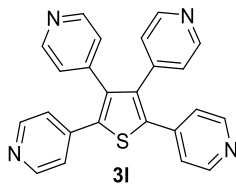

**4,4',4'',4'''-(thiophene-2,3,4,5-tetrayl)tetrapyridine (3l)**

Yield = 73% (86.2 mg). Maroon solid. Mp: 234.2–236.7 °C.  $^1\text{H}$  NMR (300 MHz,  $\text{CDCl}_3$ )  $\delta$  8.49 – 8.32 (m, 8H), 7.07 – 6.97 (m, 4H), 6.88 – 6.73 (m, 4H).  $^{13}\text{C}$  NMR (75 MHz,  $\text{CDCl}_3$ )  $\delta$  150.2, 150.0, 142.6, 140.0, 138.9, 138.0, 125.0, 123.0. IR (ATR):  $\nu = 2922, 1584, 1540, 1408, 1064, 990, 831, 724, 596, 515 \text{ cm}^{-1}$ ; HRMS (EI): calcd. for  $\text{C}_{24}\text{H}_{16}\text{N}_4\text{S}$   $[\text{M}+\text{H}]^+$ : 393.1174, found: 393.1175.

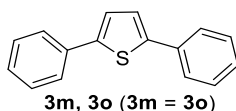

**2,5-diphenylthiophene (3m, 3o)**

Yield = 27% (19.1 mg). Pale yellow solid. Mp: 142.3–143.6 °C.  $^1\text{H}$  NMR (400 MHz,  $\text{CDCl}_3$ )  $\delta$  7.63 (dt,  $J = 8.2, 1.7 \text{ Hz}$ , 4H), 7.42 – 7.36 (m, 4H), 7.33 – 7.26 (m, 4H).  $^{13}\text{C}$  NMR (100 MHz,  $\text{CDCl}_3$ )  $\delta$  143.8, 134.5, 129.1, 127.7, 125.8, 124.1. IR (ATR):  $\nu = 2923, 1596, 1454, 1260, 1078, 1028, 804, 747, 684 \text{ cm}^{-1}$ ; HRMS (EI): calcd. for  $\text{C}_{16}\text{H}_{12}\text{S}$   $[\text{M}+\text{H}]^+$ : 237.0738, found: 237.0735.

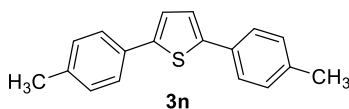

**2,5-di-p-tolylthiophene (3n)**

Yield = 36% (28.6 mg). Pale yellow solid. Mp: 162.3–163.9 °C.  $^1\text{H}$  NMR (400 MHz,  $\text{CDCl}_3$ )  $\delta$  7.51 (d,  $J = 8.2 \text{ Hz}$ , 4H), 7.24 – 7.15 (m, 6H), 2.36 (s, 6H).  $^{13}\text{C}$  NMR (100 MHz,  $\text{CDCl}_3$ )  $\delta$  143.4, 137.4, 131.8, 129.7, 125.6, 123.6, 21.3. IR (ATR):  $\nu = 2913, 1498, 1455, 1277, 1125, 940, 821, 796 \text{ cm}^{-1}$ ; HRMS (EI): calcd. for  $\text{C}_{18}\text{H}_{16}\text{S}$   $[\text{M}+\text{H}]^+$ : 265.1051, found: 265.1055.

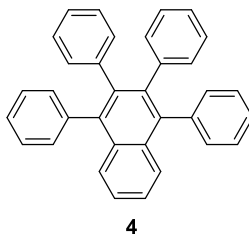

**1,2,3,4-tetraphenylnaphthalene (4)**

Total yield = 32% (41.5 mg). White solid. Mp: 191.9–193.2 °C.  $^1\text{H}$  NMR (400 MHz,  $\text{CDCl}_3$ )  $\delta$  7.64 (dd,  $J = 6.5, 3.3 \text{ Hz}$ , 2H), 7.37 (dd,  $J = 6.5, 3.3 \text{ Hz}$ , 2H), 7.26 – 7.16 (m, 10H), 6.92 – 6.76 (m, 10H).  $^{13}\text{C}$  NMR (100 MHz,  $\text{CDCl}_3$ )  $\delta$  140.6, 139.7, 139.0, 138.5, 132.1, 131.4, 127.7, 127.1, 126.7, 126.6, 126.0, 125.5. IR (ATR):  $\nu = 1924, 1600, 1440, 1029, 743, 695, 582, 560, 500 \text{ cm}^{-1}$ ; HRMS (EI): calcd. for  $\text{C}_{34}\text{H}_{24}$   $[\text{M}+\text{H}]^+$ : 433.1956, found: 433.1961.

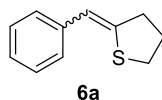

**2-benzylidenetetrahydrothiophene (*E/Z*= 24:76) (6a)**

Yield = 69% (60.8 mg). Pale yellow oil. **<sup>1</sup>H NMR** (400 MHz, CDCl<sub>3</sub>) δ 7.42 (d, *J* = 7.3 Hz, 1H), 7.35 – 7.24 (m, 2H), 7.24 – 7.10 (m, 1H), 6.46 (s, 0.76×1H), 6.42 (t, *J* = 1.9 Hz, 0.24×1H), 3.14 (t, *J* = 6.4 Hz, 0.76×2H), 3.03 (t, *J* = 6.4 Hz, 0.24×2H), 2.84 – 2.74 (m, 2H), 2.12 – 2.05 (m, 0.24×2H), 1.98 (p, *J* = 6.6 Hz, 0.76×2H). **<sup>13</sup>C NMR** (100 MHz, CDCl<sub>3</sub>) δ 145.6, 143.2, 138.4, 137.8, 128.3, 127.7(2), 127.6(7), 125.7(4), 125.6(6), 117.3, 117.1, 40.3, 35.7, 34.4, 33.0, 31.1, 28.4. **IR (ATR):** ν = 2928, 1613, 1489, 1442, 1256, 816, 749, 690, 627, 521 cm<sup>-1</sup>; **HRMS** (EI): calcd. for C<sub>11</sub>H<sub>12</sub>S [M+H]<sup>+</sup>: 177.0738, found: 177.0736.

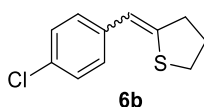

**2-(4-chlorobenzylidene)tetrahydrothiophene (*E/Z*= 5:95) (6b)**

Yield = 72% (75.9 mg). White solid. **Mp**: 42.1–43.8 °C. **<sup>1</sup>H NMR** (400 MHz, CDCl<sub>3</sub>) δ 7.40 – 7.31 (m, 2H), 7.31 – 7.25 (m, 2H), 6.41 (s, 0.95×1H), 6.36 (s, 0.05×1H), 3.19 (t, *J* = 6.4 Hz, 0.95×2H), 3.07 (t, *J* = 6.4 Hz, 0.05×2H), 2.80 (td, *J* = 6.8, 1.5 Hz, 2H), 2.13 (p, *J* = 6.6 Hz, 0.05×2H), 2.02 (p, *J* = 6.6 Hz, 0.95×2H). **<sup>13</sup>C NMR** (100 MHz, CDCl<sub>3</sub>) δ 144.3, 136.4, 131.1, 128.9, 128.5, 115.9, 40.4, 35.8, 28.5. **IR (ATR):** ν = 2946, 2856, 1612, 1561, 1487, 1403, 1084, 1004, 862, 840, 690, 619 cm<sup>-1</sup>; **HRMS** (EI): calcd. for C<sub>11</sub>H<sub>11</sub>ClS [M+H]<sup>+</sup>: 211.0348, found: 211.0347.

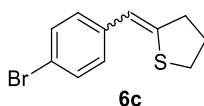

**2-(4-bromobenzylidene)tetrahydrothiophene (*E/Z*= 23:77) (6c)**

Yield = 66% (84.2 mg). White solid. **Mp**: 40.3–42.0 °C. **<sup>1</sup>H NMR** (400 MHz, CDCl<sub>3</sub>) δ 7.48 – 7.38 (m), 7.32 – 7.27 (m), 7.12 – 7.04 (m), 6.41 (s, 0.77×1H), 6.36 (t, *J* = 2.0 Hz, 0.23×1H), 3.20 (t, *J* = 6.4 Hz, 0.77×2H), 3.09 (t, *J* = 6.4 Hz, 0.23×2H), 2.87 – 2.76 (m, 2H), 2.15 (p, *J* = 6.6 Hz, 0.23×2H), 2.05 (p, *J* = 6.6 Hz, 0.77×2H). **<sup>13</sup>C NMR** (100 MHz, CDCl<sub>3</sub>) δ 146.8, 144.5, 137.3, 136.8, 131.4(3), 131.4(0), 129.2(5), 129.2(3), 119.2(6), 119.2(1), 116.1(0), 115.9(6), 40.4, 35.9, 34.5, 33.1, 31.1, 28.5. **IR (ATR):** ν = 2926, 1610, 1482, 1398, 861, 838, 798, 666, 518, 444 cm<sup>-1</sup>; **HRMS** (EI): calcd. for C<sub>11</sub>H<sub>11</sub>BrS [M+H]<sup>+</sup>: 254.9843, found: 254.9841.

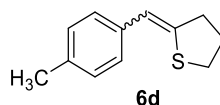

**2-(4-methylbenzylidene)tetrahydrothiophene (*E/Z*= 13:87) (6d)**

Yield = 52% (49.5 mg). Colorless oil. **<sup>1</sup>H NMR** (400 MHz, CDCl<sub>3</sub>) δ 7.35 (d, *J* = 8.1 Hz), 7.20 – 7.12 (m), 6.48 (s, 0.87×1H), 6.43 (t, *J* = 2.0 Hz, 0.13×1H), 3.20 (t, *J* = 6.4 Hz, 0.87×2H), 3.09 (t, *J* = 6.4 Hz, 0.13×2H), 2.83 (td, *J* = 6.8, 1.5 Hz, 2H), 2.35 (s, 2H), 2.15 (p, *J* = 6.6 Hz, 0.13×2H), 2.05 (p, *J* = 6.6 Hz, 0.87×2H). **<sup>13</sup>C NMR** (100 MHz, CDCl<sub>3</sub>) δ 144.4, 142.0, 135.7, 135.4, 135.3, 135.1, 129.1, 127.6(6),

127.6(2), 117.2, 117.0, 40.2, 35.6, 34.3, 32.9, 31.1, 28.5, 21.2(8), 21.2(2). **IR (ATR):**  $\nu$  = 2940, 1601, 1413, 1322, 1107, 1067, 964, 861, 656  $\text{cm}^{-1}$ ; **HRMS (EI):** calcd. for  $\text{C}_{12}\text{H}_{14}\text{S}$   $[\text{M}+\text{H}]^+$ : 191.0894, found: 191.0890.

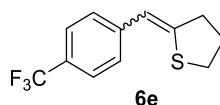

**2-(4-(trifluoromethyl)benzylidene)tetrahydrothiophene (*E/Z* = 30:70) (6e)**

Yield = 68% (83.1 mg). White solid. **Mp:** 47.2–48.1 °C. **<sup>1</sup>H NMR** (400 MHz,  $\text{CDCl}_3$ )  $\delta$  7.62 – 7.46 (m), 7.28 (d,  $J$  = 8.2 Hz), 6.49 (s, 0.7×1H), 6.44 (s, 0.3×1H), 3.21 (t,  $J$  = 6.4 Hz, 0.7×2H), 3.08 (t,  $J$  = 6.4 Hz, 0.3×2H), 2.91 – 2.76 (m, 2H), 2.15 (p,  $J$  = 6.6 Hz, 0.3×2H), 2.04 (p,  $J$  = 6.6 Hz, 0.7×2H). **<sup>13</sup>C NMR** (100 MHz,  $\text{CDCl}_3$ )  $\delta$  149.2, 147.0, 141.8 (d,  $J$  = 1.3 Hz), 141.4, 129.5, 129.2, 128.6, 127.7(1), 127.6(7), 127.5, 127.2 (d,  $J$  = 32.1 Hz), 127.1, 126.8, 125.3 (q,  $J$  = 7.5 Hz), 124.5 (d,  $J$  = 270 Hz), 120.5, 115.9, 115.8, 40.6, 36.0, 34.7, 33.1, 31.2, 28.4. **IR (ATR):**  $\nu$  = 2940, 1601, 1413, 1322, 1107, 1067, 964, 861, 656  $\text{cm}^{-1}$ ; **HRMS (EI):** calcd. for  $\text{C}_{12}\text{H}_{11}\text{F}_3\text{S}$   $[\text{M}+\text{H}]^+$ : 245.0612, found: 245.0608.

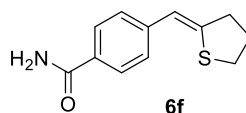

**(*Z*)-4-((dihydrothiophen-2(3H)-ylidene)methyl)benzamide (6f)**

Yield = 48% (52.6 mg). White solid. **Mp:** 165.3–166.1 °C. **<sup>1</sup>H NMR** (400 MHz,  $\text{DMSO}-d_6$ )  $\delta$  8.07 – 7.68 (m, 3H), 7.52 – 7.14 (m, 3H), 6.55 (s, 1H), 3.19 (s, 2H), 2.80 (s, 2H), 1.94 (s, 2H). **<sup>13</sup>C NMR** (100 MHz,  $\text{DMSO}-d_6$ )  $\delta$  167.6, 146.3, 140.3, 131.0, 127.7, 126.7, 115.7, 40.0, 35.4, 28.0. **IR (ATR):**  $\nu$  = 3394, 3173, 1641, 1598, 1556, 1386, 866, 759, 630  $\text{cm}^{-1}$ ; **HRMS (EI):** calcd. for  $\text{C}_{12}\text{H}_{13}\text{NOS}$   $[\text{M}+\text{H}]^+$ : 220.0796, found: 220.0798.

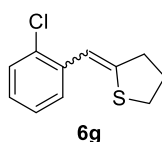

**(*Z*)-2-(2-chlorobenzylidene)tetrahydrothiophene (6g)**

Yield = 45% (47.4 mg). Pale yellow oil. **<sup>1</sup>H NMR** (400 MHz,  $\text{CDCl}_3$ )  $\delta$  7.73 (dd,  $J$  = 7.8, 1.4 Hz, 1H), 7.35 (dd,  $J$  = 8.0, 1.2 Hz, 1H), 7.29 – 7.23 (m, 1H), 7.09 (td,  $J$  = 7.7, 1.5 Hz, 1H), 6.76 (s, 1H), 3.18 (t,  $J$  = 6.4 Hz, 2H), 2.87 (td,  $J$  = 6.9, 1.6 Hz, 2H), 2.06 (p,  $J$  = 6.6 Hz, 2H). **<sup>13</sup>C NMR** (100 MHz,  $\text{CDCl}_3$ )  $\delta$  146.3, 135.8, 132.8, 129.5, 128.4, 127.0, 126.6, 113.3, 40.3, 35.4, 28.5. **IR (ATR):**  $\nu$  = 2925, 1607, 1433, 1256, 1034, 748, 692, 622, 469, 422  $\text{cm}^{-1}$ ; **HRMS (EI):** calcd. for  $\text{C}_{11}\text{H}_{11}\text{ClS}$   $[\text{M}+\text{H}]^+$ : 211.0348, found: 211.0350.

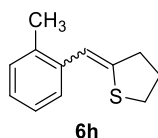

**2-(2-methylbenzylidene)tetrahydrothiophene (*E/Z* = 18:82) (6h)**

Yield = 68% (64.7 mg). Colorless oil. **<sup>1</sup>H NMR** (400 MHz,  $\text{CDCl}_3$ )  $\delta$  7.59 (d,  $J$  = 7.7 Hz), 7.26 – 7.01

(m), 6.52 (s, 0.82×1H), 6.44 (s, 0.18×1H), 3.09 (t,  $J = 6.4$  Hz, 0.82×2H), 3.05 (t,  $J = 6.4$  Hz, 0.18×2H), 2.79 (td,  $J = 6.8, 1.6$  Hz, 0.82×2H), 2.69 (td,  $J = 6.8, 2.1$  Hz, 0.18×2H), 2.28 (s, 0.82×3H), 2.25 (s, 0.18×3H), 2.02 (dp,  $J = 19.9, 6.6$  Hz, 2H).  $^{13}\text{C}$  NMR (100 MHz,  $\text{CDCl}_3$ )  $\delta$  145.2, 144.0, 137.5, 136.8, 135.7, 135.5, 123.0, 129.9, 128.1, 127.1, 126.2, 125.7, 125.6, 115.7, 114.6, 39.8, 34.9, 34.3, 33.1, 30.7, 28.6, 20.1. **IR (ATR):**  $\nu = 2947, 1597, 1481, 1256, 1007, 746, 718, 626, 647\text{ cm}^{-1}$ ; **HRMS (EI):** calcd. for  $\text{C}_{12}\text{H}_{14}\text{S}$   $[\text{M}+\text{H}]^+$ : 191.0894, found: 191.0891.

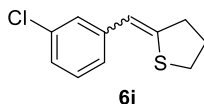

**(Z)-2-(3-chlorobenzylidene)tetrahydrothiophene (6i)**

Yield = 30% (31.6 mg). Pale yellow oil.  $^1\text{H}$  NMR (400 MHz,  $\text{CDCl}_3$ )  $\delta$  7.40 (d,  $J = 1.6$  Hz, 1H), 7.25 (dq,  $J = 13.8, 7.9$  Hz, 2H), 7.12 (d,  $J = 7.8$  Hz, 1H), 6.41 (s, 1H), 3.20 (t,  $J = 6.4$  Hz, 2H), 2.83 (td,  $J = 6.8, 1.4$  Hz, 2H), 2.04 (p,  $J = 6.6$  Hz, 2H).  $^{13}\text{C}$  NMR (100 MHz,  $\text{CDCl}_3$ )  $\delta$  145.4, 139.7, 134.3, 129.6, 127.6, 125.7, 125.7, 115.8, 40.5, 35.9, 28.5. **IR (ATR):**  $\nu = 2953, 1722, 1589, 1473, 1254, 1081, 773, 683, 651, 461\text{ cm}^{-1}$ ; **HRMS (EI):** calcd. for  $\text{C}_{11}\text{H}_{11}\text{ClS}$   $[\text{M}+\text{H}]^+$ : 211.0348, found: 211.0344.

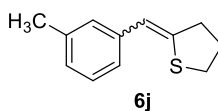

**2-(3-methylbenzylidene)tetrahydrothiophene (E/Z= 17:83) (6j)**

Yield = 68% (64.7 mg). Pale yellow oil.  $^1\text{H}$  NMR (400 MHz,  $\text{CDCl}_3$ )  $\delta$  7.30 – 7.11 (m), 6.98 (dd,  $J = 23.7, 7.3$  Hz), 6.42 (s, 0.83×1H), 6.38 (s, 0.17×1H), 3.13 (t,  $J = 6.4$  Hz, 0.83×2H), 3.01 (t,  $J = 6.4$  Hz, 0.17×2H), 2.78 (dtd,  $J = 8.4, 6.9, 1.8$  Hz, 2H), 2.32 (d,  $J = 9.5$  Hz, 3H), 2.11 – 2.03 (m, 0.17×2H), 1.97 (p,  $J = 6.6$  Hz, 0.83×2H).  $^{13}\text{C}$  NMR (100 MHz,  $\text{CDCl}_3$ )  $\delta$  145.3, 142.9, 137.7(2), 137.6(9), 130.0, 128.5, 128.4, 128.3, 128.2, 127.4, 126.5, 126.4, 126.2, 124.7, 117.2, 117.1, 40.2, 35.6, 34.3, 32.8, 31.1, 28.4, 21.6, 21.4. **IR (ATR):**  $\nu = 2927, 1599, 1258, 1097, 818, 774, 693, 632, 459\text{ cm}^{-1}$ ; **HRMS (EI):** calcd. for  $\text{C}_{12}\text{H}_{14}\text{S}$   $[\text{M}+\text{H}]^+$ : 191.0894, found: 191.0891.

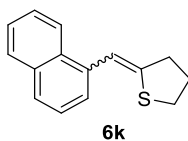

**2-(naphthalen-1-ylmethylene)tetrahydrothiophene (E/Z= 24:76) (6k)**

Yield = 60% (67.9 mg). Colorless oil.  $^1\text{H}$  NMR (400 MHz,  $\text{CDCl}_3$ )  $\delta$  7.98 – 7.87 (m, 1H), 7.71 – 7.60 (m, 2H), 7.55 (d,  $J = 8.2$  Hz, 1H), 7.31 (dddd,  $J = 14.0, 12.3, 7.2, 5.4$  Hz, 3H), 6.91 (s, 0.76×1H), 6.81 (s, 0.24×1H), 2.92 (t,  $J = 6.4$  Hz, 2H), 2.70 (td,  $J = 6.9, 1.6$  Hz, 0.76×2H), 2.51 (td,  $J = 6.8, 2.1$  Hz, 0.24×2H), 1.91 – 1.77 (m, 2H).  $^{13}\text{C}$  NMR (100 MHz,  $\text{CDCl}_3$ )  $\delta$  146.9, 145.9, 135.6, 135.0, 133.6(9), 133.6(0), 131.6, 131.3, 128.5, 128.4, 126.7(1), 126.6(5), 125.8(0), 125.7(6), 125.7(3), 125.6(2), 125.6(0), 125.5, 125.3, 125.2, 124.7, 124.0, 114.4, 113.4, 39.6, 34.7, 34.6, 33.3, 30.5, 28.6. **IR (ATR):**  $\nu = 2928, 1588, 1394, 1254, 1007, 773, 635, 457\text{ cm}^{-1}$ ; **HRMS (EI):** calcd. for  $\text{C}_{15}\text{H}_{14}\text{S}$   $[\text{M}+\text{H}]^+$ : 227.0894, found: 227.0890.

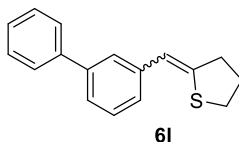

**2-([1,1'-biphenyl]-4-ylmethylene)tetrahydrothiophene (*E/Z*= 15:85) (6l)**

Yield = 76% (95.9 mg). White solid. **Mp**: 81.9-83.4 °C. **<sup>1</sup>H NMR** (400 MHz, CDCl<sub>3</sub>) δ 7.56 (ddd, *J* = 25.3, 12.8, 4.8 Hz, 6H), 7.42 (t, *J* = 7.7 Hz, 2H), 7.36 – 7.27 (m, 1H), 6.52 (s, 0.85×1H), 6.47 (s, 0.15×1H), 3.22 (t, *J* = 6.4 Hz, 0.85×2H), 3.10 (t, *J* = 6.4 Hz, 0.15×2H), 2.87 (dtd, *J* = 8.2, 6.9, 1.8 Hz, 2H), 2.17 (p, *J* = 6.6 Hz, 0.15×2H), 2.06 (p, *J* = 6.6 Hz, 0.85×2H). **<sup>13</sup>C NMR** (100 MHz, CDCl<sub>3</sub>) δ 145.9, 143.6, 141.0, 140.8, 138.3, 137.5, 137.0, 128.8, 128.1, 127.2, 127.1, 127.0(1), 126.9(7), 116.9, 116.7, 40.4, 35.8, 34.5, 33.0, 31.2, 28.5. **IR (ATR)**: ν = 2927, 1611, 1482, 1406, 1257, 1076, 1012, 864, 757, 687, 552, 500 cm<sup>-1</sup>; **HRMS** (EI): calcd. for C<sub>17</sub>H<sub>16</sub>S [M+H]<sup>+</sup>: 253.1051, found: 253.1048.

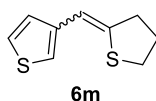

**3-((dihydrothiophen-2(3H)-ylidene)methyl)thiophene (*E/Z*= 14:86) (6m)**

Yield = 68% (62.0 mg). Colorless oil. **<sup>1</sup>H NMR** (400 MHz, CDCl<sub>3</sub>) δ 7.23 (ddd, *J* = 7.5, 6.9, 4.3 Hz), 7.15 (dd, *J* = 4.9, 1.3 Hz), 7.01 (dd, *J* = 5.0, 1.2 Hz), 6.96 (d, *J* = 2.7 Hz), 6.50 (s, 0.88×1H), 6.42 (t, *J* = 1.9 Hz, 0.12×1H), 3.16 (t, *J* = 6.4 Hz, 0.88×2H), 3.04 (t, *J* = 6.4 Hz, 0.12×2H), 2.83 – 2.68 (m, 2H), 2.07 (dp, *J* = 42.7, 6.7 Hz, 2H). **<sup>13</sup>C NMR** (100 MHz, CDCl<sub>3</sub>) δ 144.4, 142.6, 139.6, 139.3, 128.1, 127.8, 124.9, 124.8, 120.5, 120.0, 111.7, 111.4, 39.4, 35.5, 34.5, 33.3, 31.0, 28.9. **IR (ATR)**: ν = 2928, 1616, 1259, 1078, 1008, 815, 758, 624, 609, 448 cm<sup>-1</sup>; **HRMS** (EI): calcd. for C<sub>9</sub>H<sub>10</sub>S<sub>2</sub> [M+H]<sup>+</sup>: 183.0302, found: 183.0304.

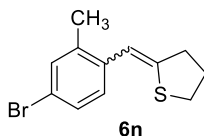

**2-(4-bromo-2-methylbenzylidene)tetrahydrothiophene (*E/Z*= 21:79) (6n)**

Yield = 65% (87.5 mg). Colorless oil. **<sup>1</sup>H NMR** (400 MHz, CDCl<sub>3</sub>) δ 7.45 (d, *J* = 8.3 Hz), 7.37 – 7.15 (m, 2H), 7.01 (d, *J* = 8.1 Hz), 6.41 (s, 0.79×1H), 6.32 (s, 0.21×1H), 3.11 (t, *J* = 6.4 Hz, 0.79×2H), 3.06 (t, *J* = 6.4 Hz, 0.21×2H), 2.78 (td, *J* = 6.8, 1.6 Hz, 0.79×2H), 2.64 (td, *J* = 6.8, 2.1 Hz, 0.21×2H), 2.22 (d, *J* = 9.9 Hz, 3H), 2.12 – 1.93 (m, 2H). **<sup>13</sup>C NMR** (100 MHz, CDCl<sub>3</sub>) δ 146.4, 145.1, 137.9, 137.7, 136.4, 135.8, 132.6(4), 132.6(0), 129.5, 128.6(7), 128.6(0), 128.5, 119.5, 119.4, 114.4, 113.5, 39.9, 35.1, 34.3, 33.2, 30.7, 28.6, 19.9(2), 19.9(0). **IR (ATR)**: ν = 2929, 1610, 1475, 1256, 1121, 871, 824, 653, 551, 478 cm<sup>-1</sup>; **HRMS** (EI): calcd. for C<sub>12</sub>H<sub>13</sub>BrS [M+H]<sup>+</sup>: 269.0000, found: 269.0002.

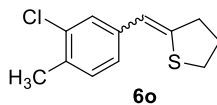

**2-(3-chloro-4-methylbenzylidene)tetrahydrothiophene (*E/Z*= 14:86) (6o)**

Yield = 57% (64.1 mg). White solid. **Mp**: 69.1-70.6 °C. **<sup>1</sup>H NMR** (400 MHz, CDCl<sub>3</sub>) δ 7.39 (d, *J* = 1.6 Hz), 7.24 – 7.08 (m, 2H), 6.96 (dd, *J* = 7.9, 1.6 Hz), 6.35 (s, 0.86×1H), 6.31 (s, 0.14×1H), 3.15 (t, *J* =



6.4 Hz, 0.86×2H), 3.04 (t,  $J = 6.4$  Hz, 0.14×2H), 2.77 (ddd,  $J = 8.3, 5.9, 2.5$  Hz, 2H), 2.37 – 2.31 (m, 3H), 2.05 (dp,  $J = 44.2, 6.7$  Hz, 2H).  $^{13}\text{C}$  NMR (100 MHz,  $\text{CDCl}_3$ )  $\delta$  146.4, 144.1, 137.6, 137.2, 134.2(5), 134.2(2), 133.0(7), 133.0(2), 130.7, 128.0, 127.8, 126.0, 125.7(8), 115.7(4), 115.6, 40.2, 35.7, 34.4, 33.0, 31.1, 28.4, 19.7(8), 19.7(2). IR (ATR):  $\nu = 2931, 1599, 1490, 1256, 1045, 882, 817, 582, 440\text{ cm}^{-1}$ ; HRMS (EI): calcd. for  $\text{C}_{12}\text{H}_{13}\text{ClS}$   $[\text{M}+\text{H}]^+$ : 225.0505, found: 225.0499.

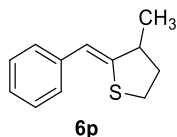

**(Z)-2-benzylidene-3-methyltetrahydrothiophene (6p)**

Yield = 36% (34.3 mg). Colorless oil.  $^1\text{H}$  NMR (400 MHz,  $\text{CDCl}_3$ )  $\delta$  7.51 (d,  $J = 7.5$  Hz, 2H), 7.39 (t,  $J = 7.7$  Hz, 2H), 7.20 (t,  $J = 7.3$  Hz, 1H), 6.42 (s, 1H), 3.24 – 3.09 (m, 2H), 2.98 (dd,  $J = 13.3, 6.6$  Hz, 1H), 2.22 (dq,  $J = 11.9, 5.9$  Hz, 1H), 1.75 (ddd,  $J = 14.3, 12.4, 7.8$  Hz, 1H), 1.32 (d,  $J = 6.7$  Hz, 3H).  $^{13}\text{C}$  NMR (100 MHz,  $\text{CDCl}_3$ )  $\delta$  147.0, 137.4, 127.8, 127.4, 125.3, 115.9, 44.5, 35.9, 31.9, 18.4. IR (ATR):  $\nu = 2926, 1610, 1444, 1255, 1111, 750, 690, 665, 516\text{ cm}^{-1}$ ; HRMS (EI): calcd. for  $\text{C}_{12}\text{H}_{14}\text{S}$   $[\text{M}+\text{H}]^+$ : 191.0894, found: 191.0896.

## 10. Unsuccessful examples

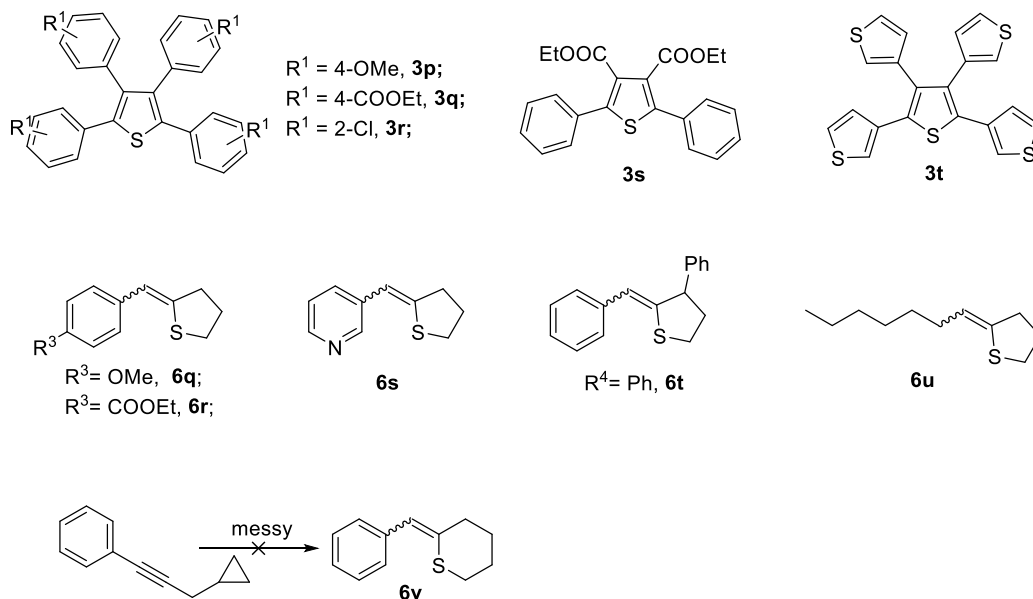

## 11. Copies of $^1\text{H}$ NMR and $^{13}\text{C}$ NMR Spectra for Compounds

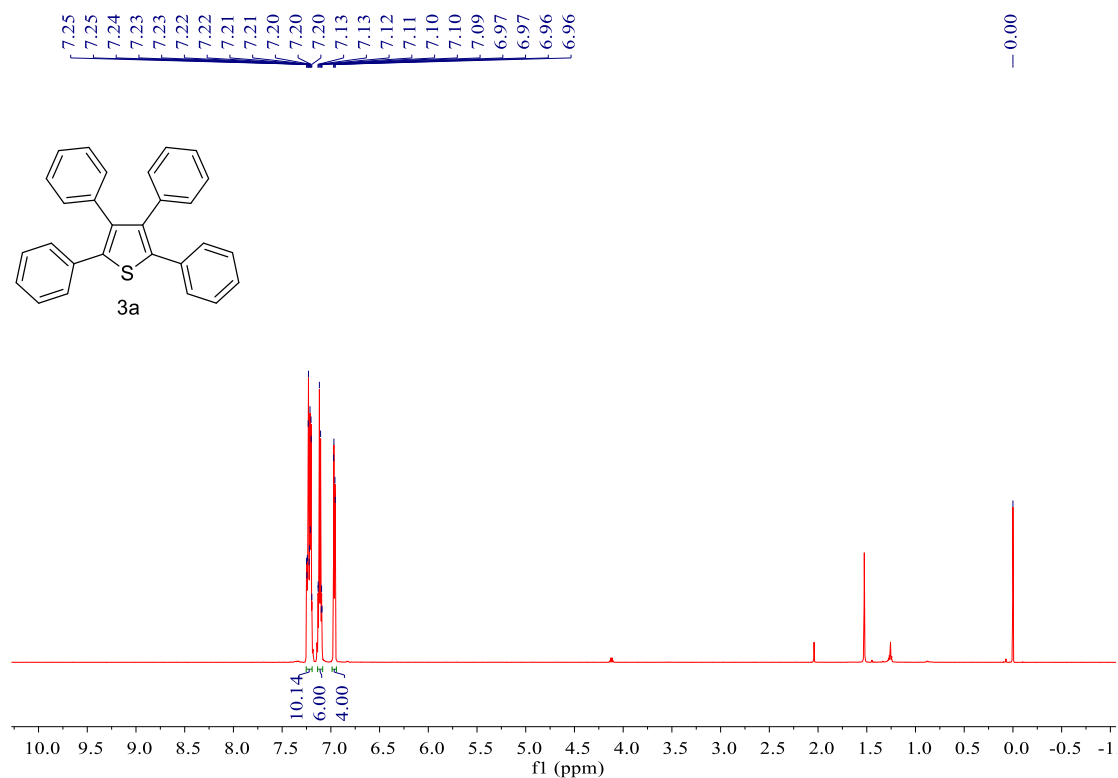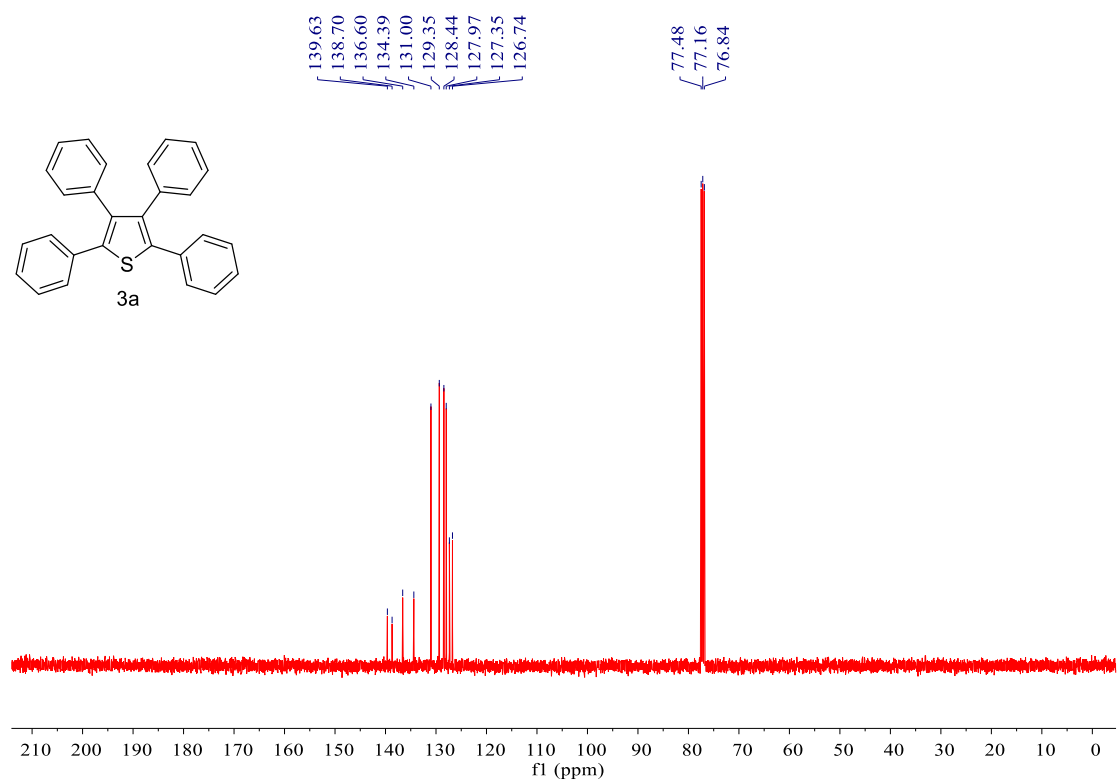

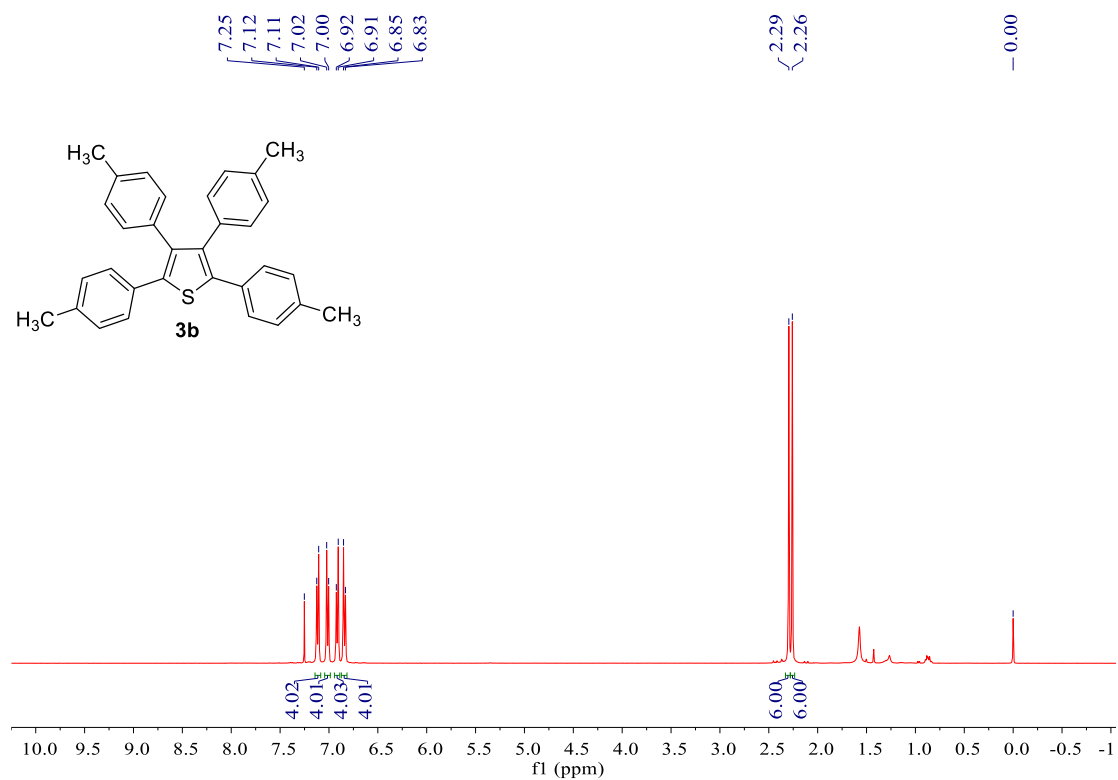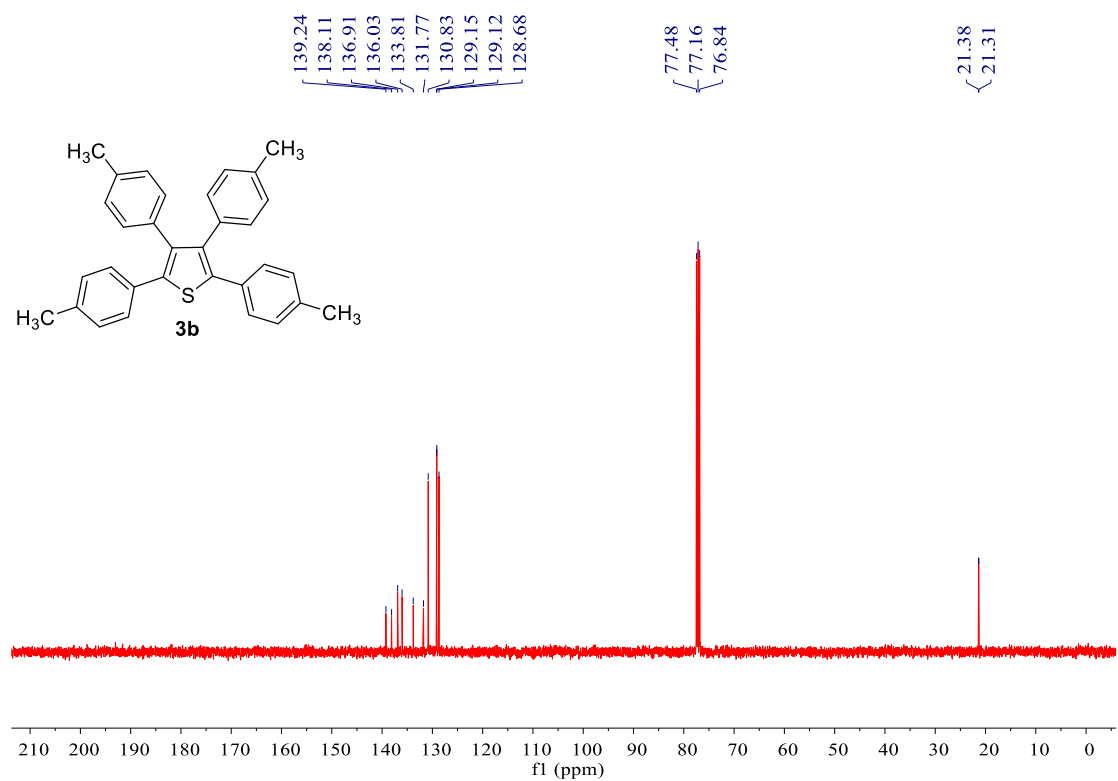

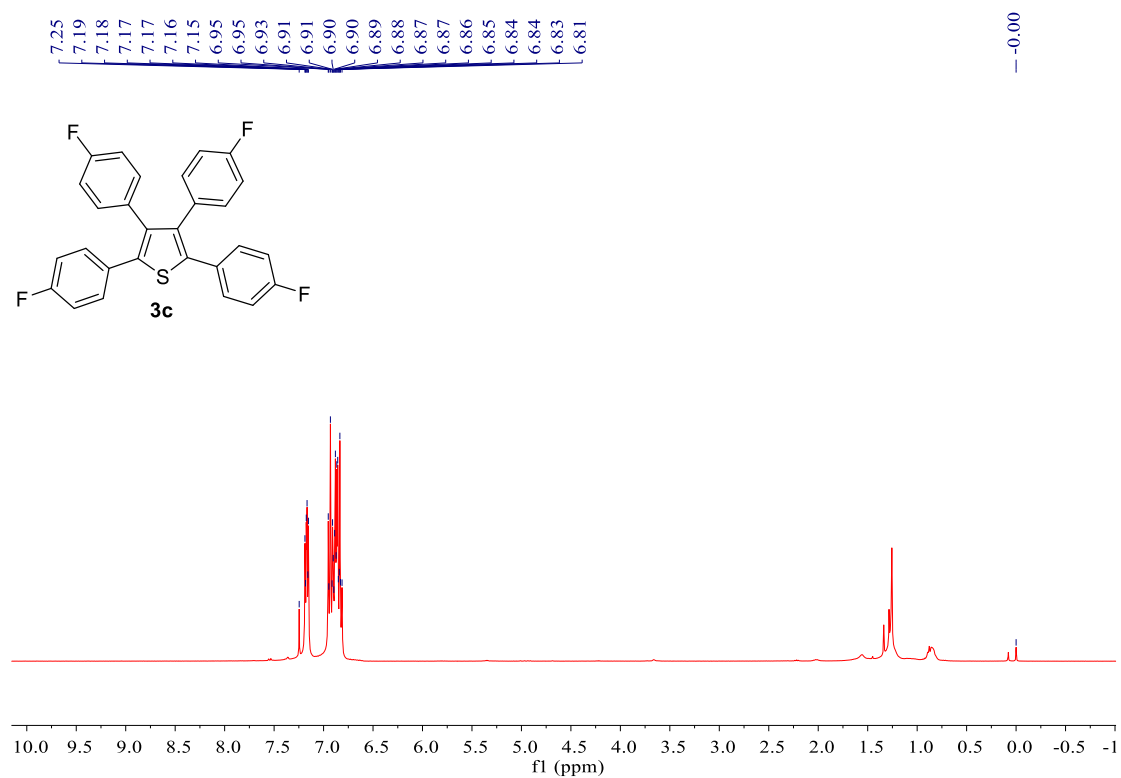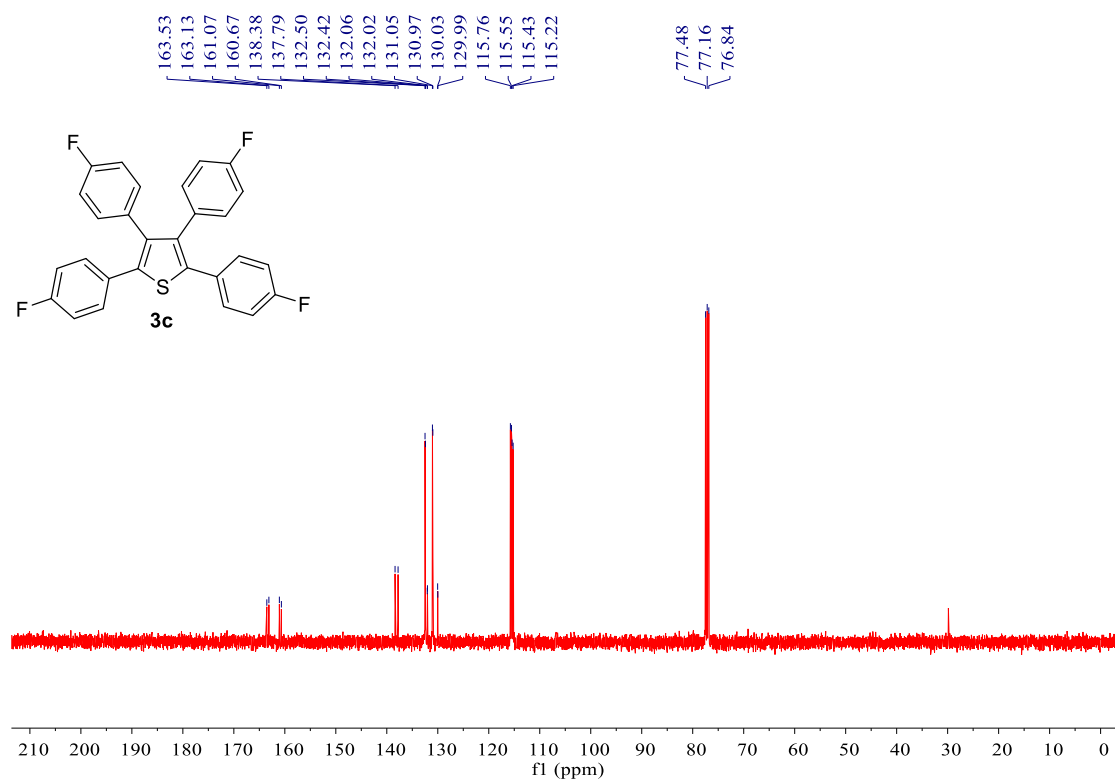

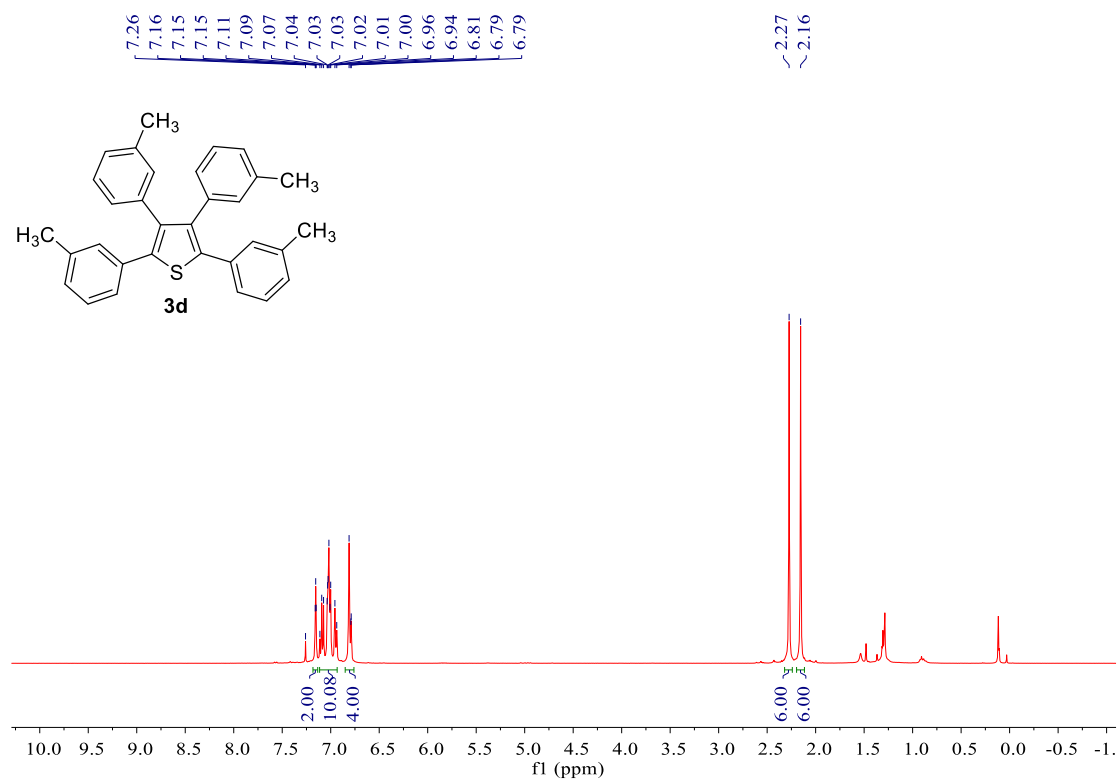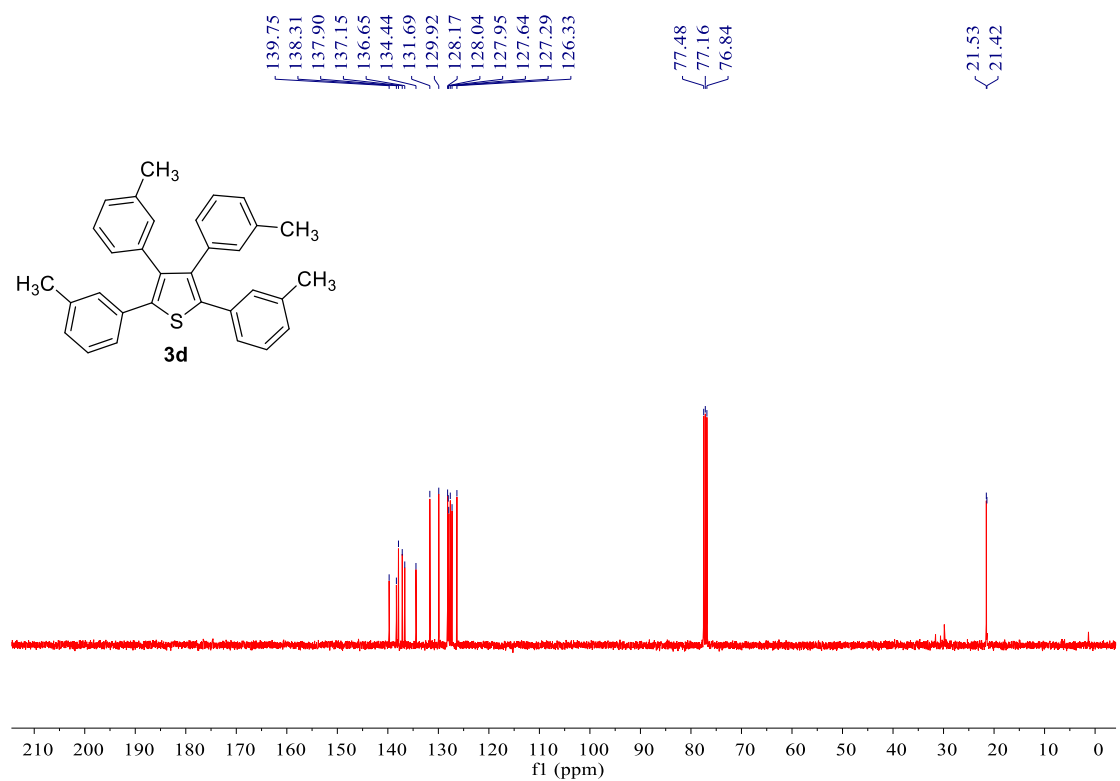

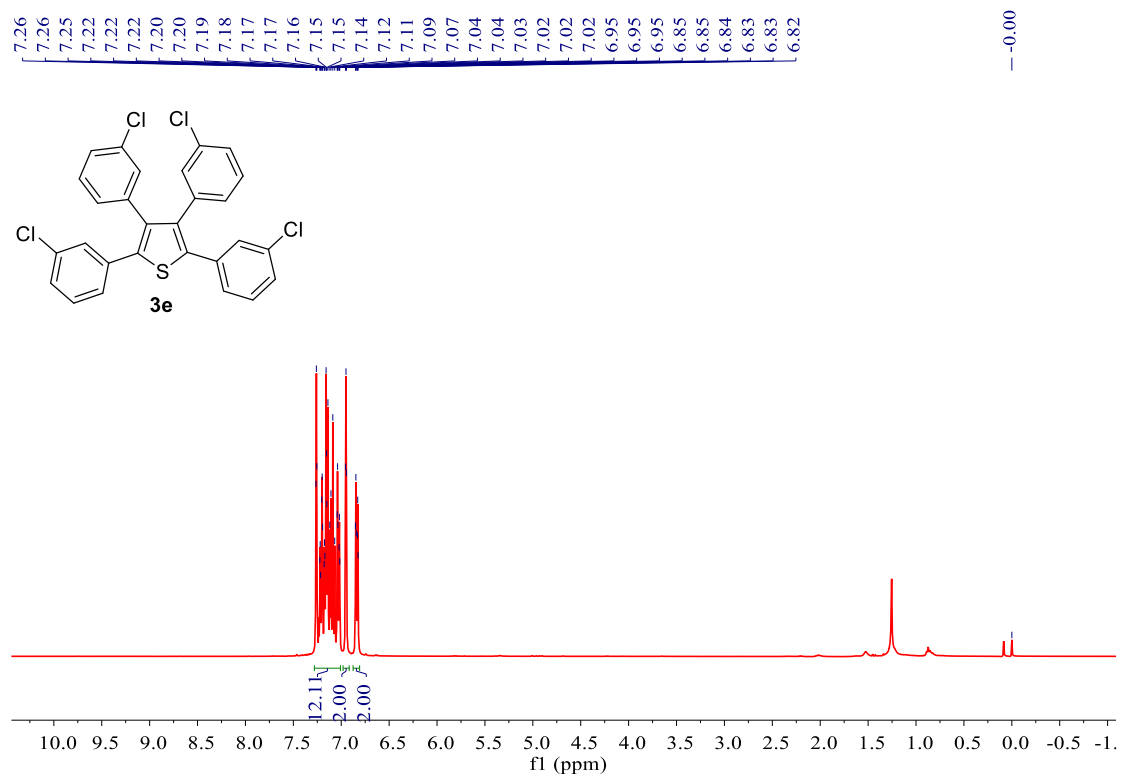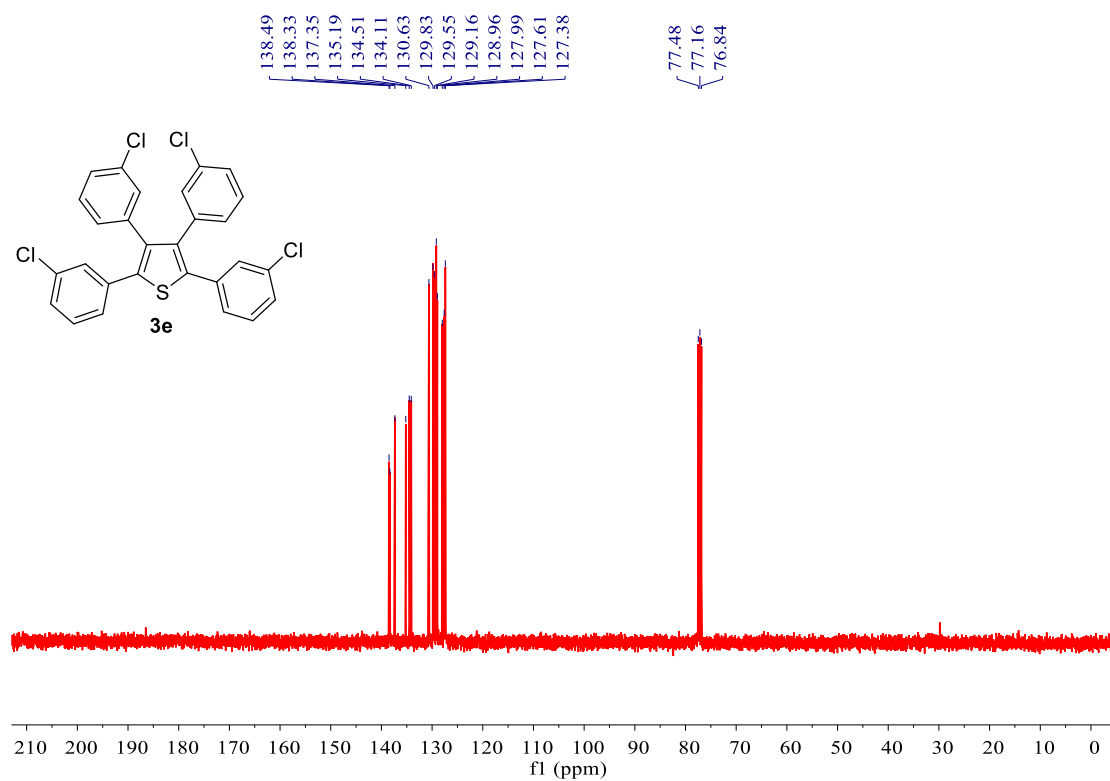

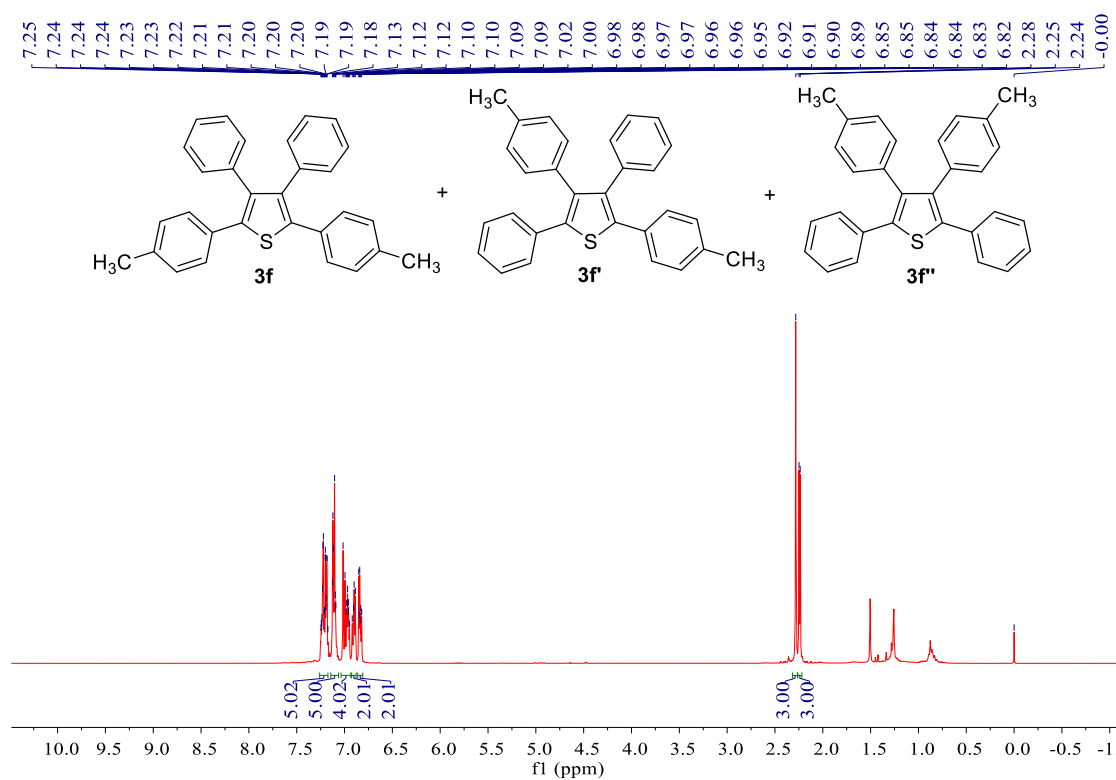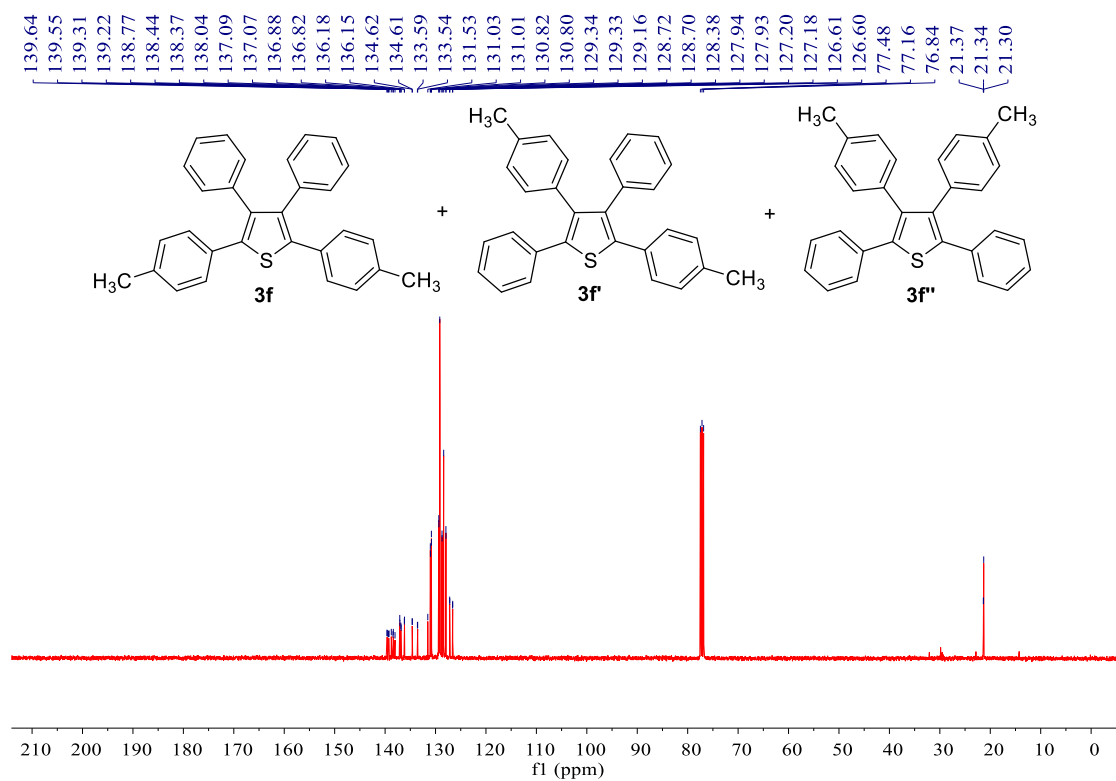

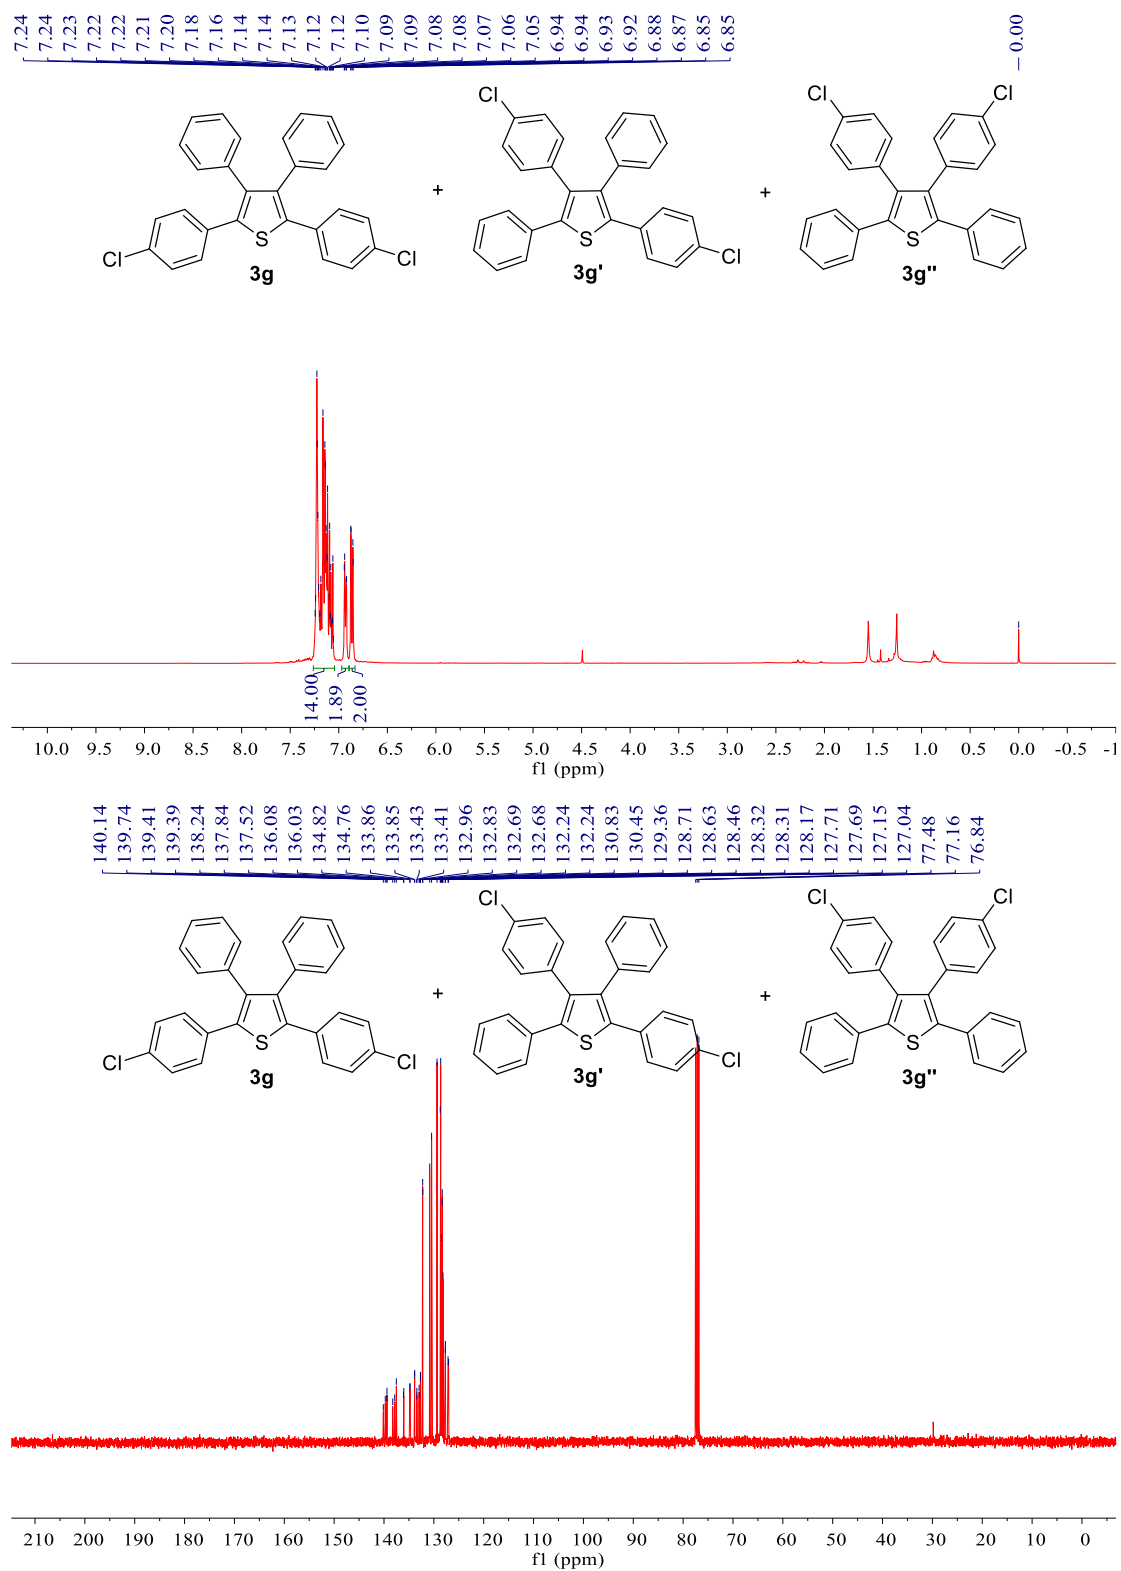



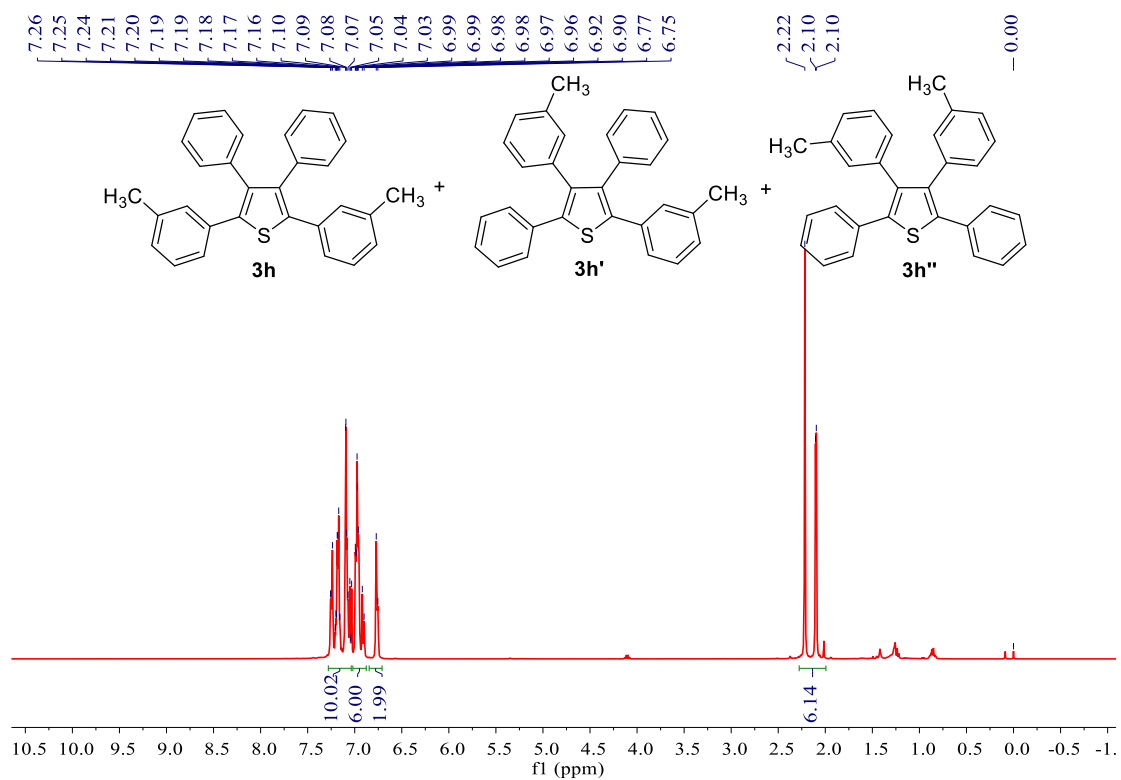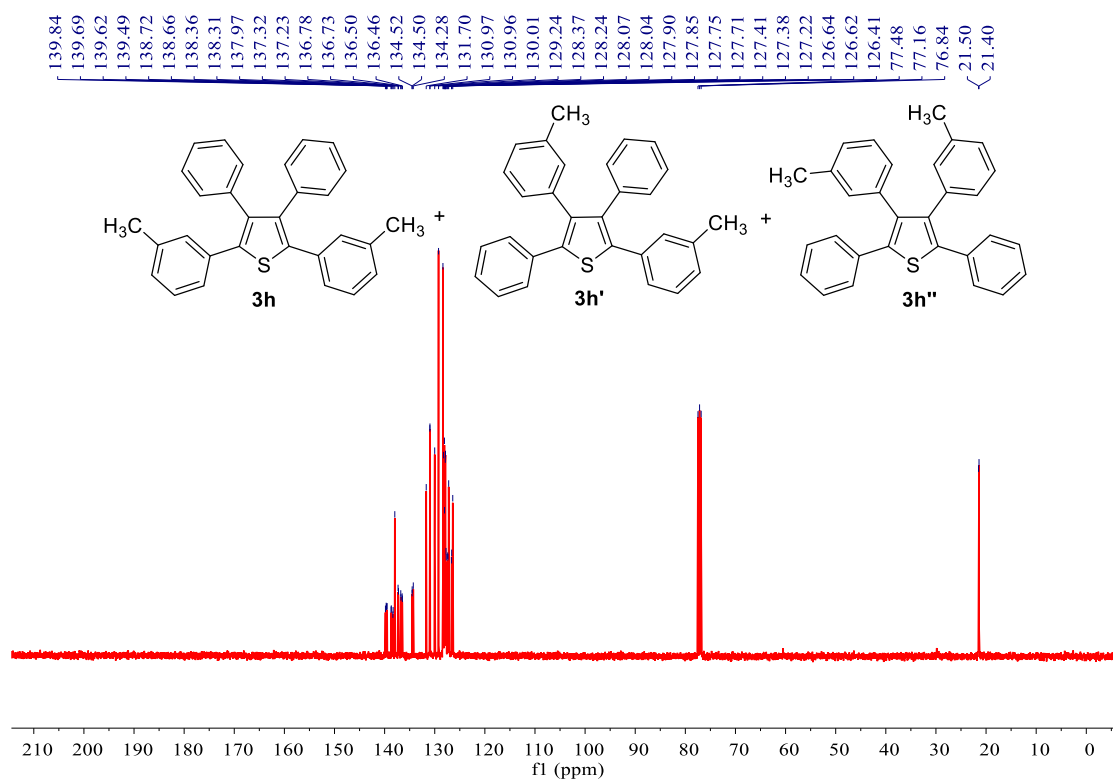

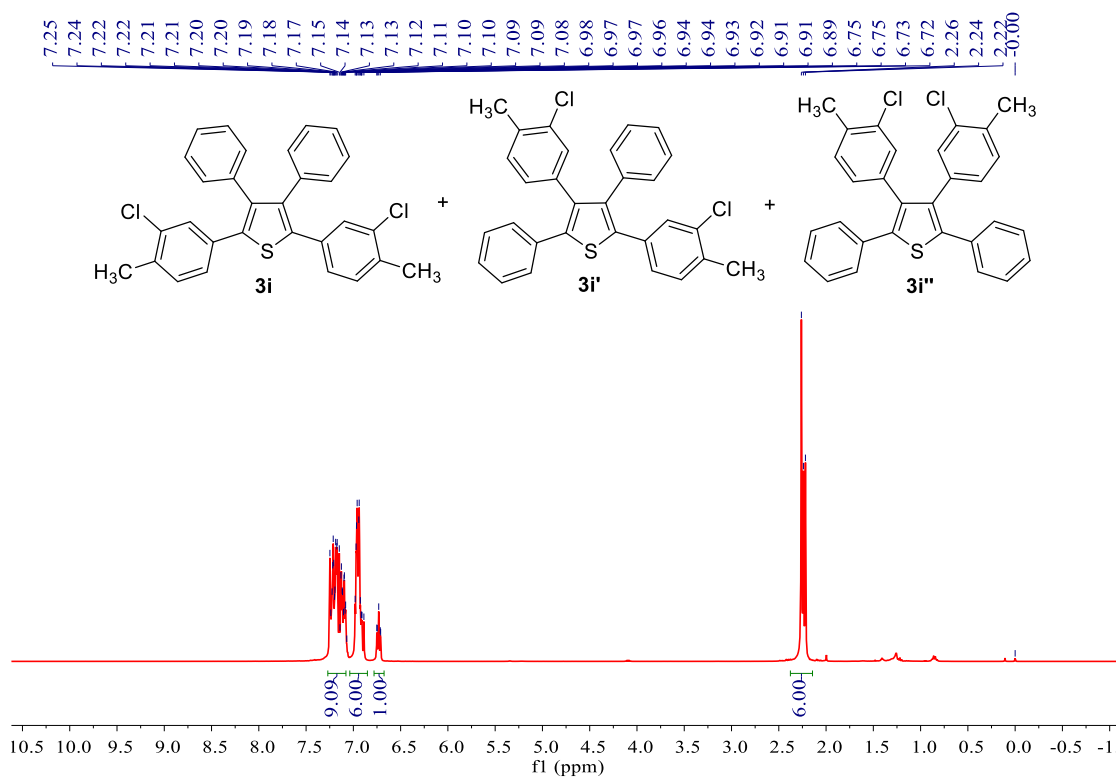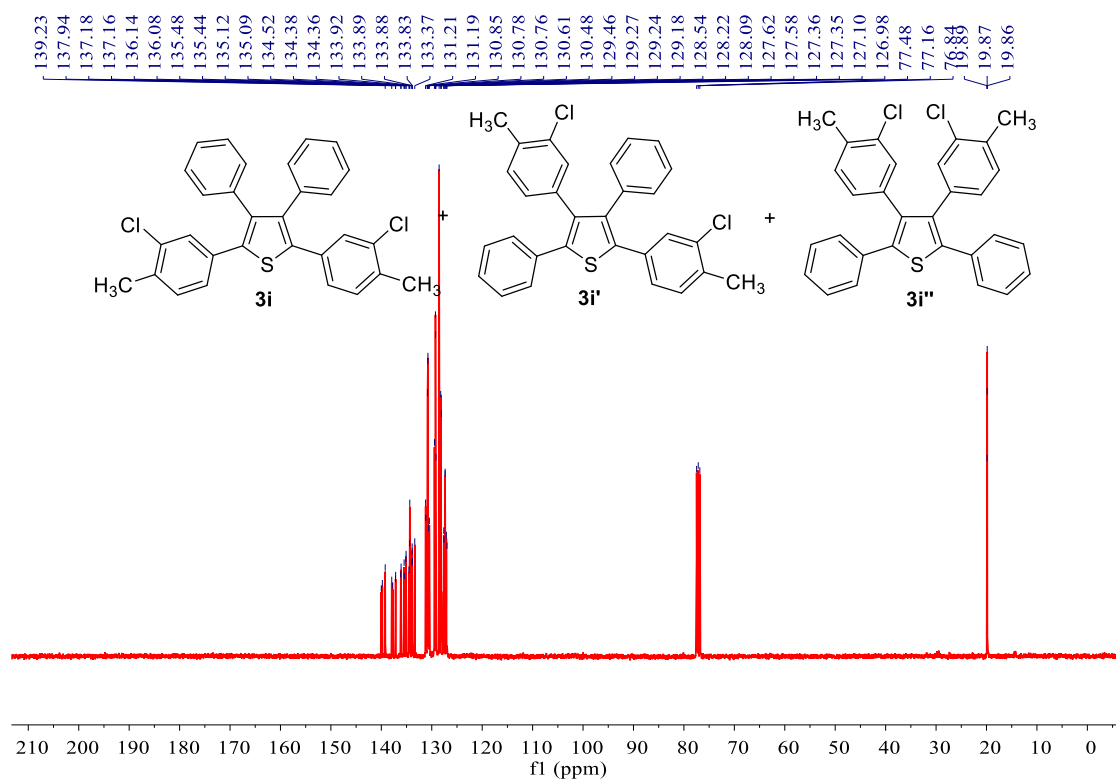

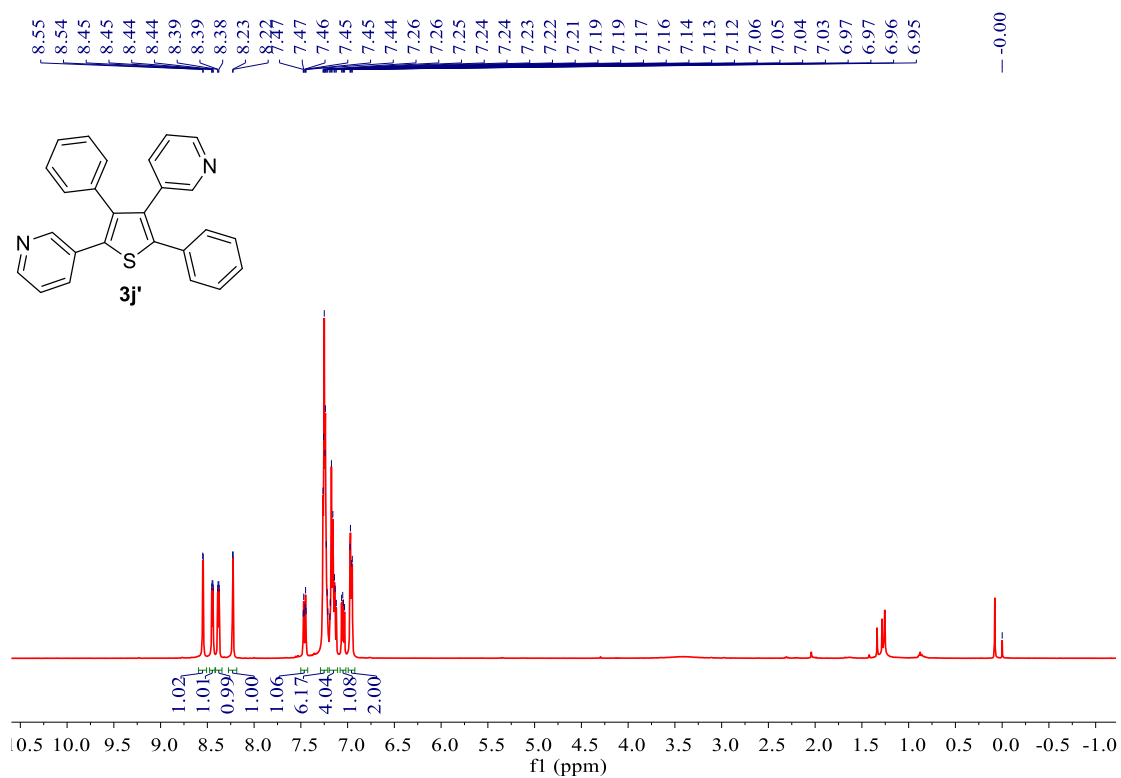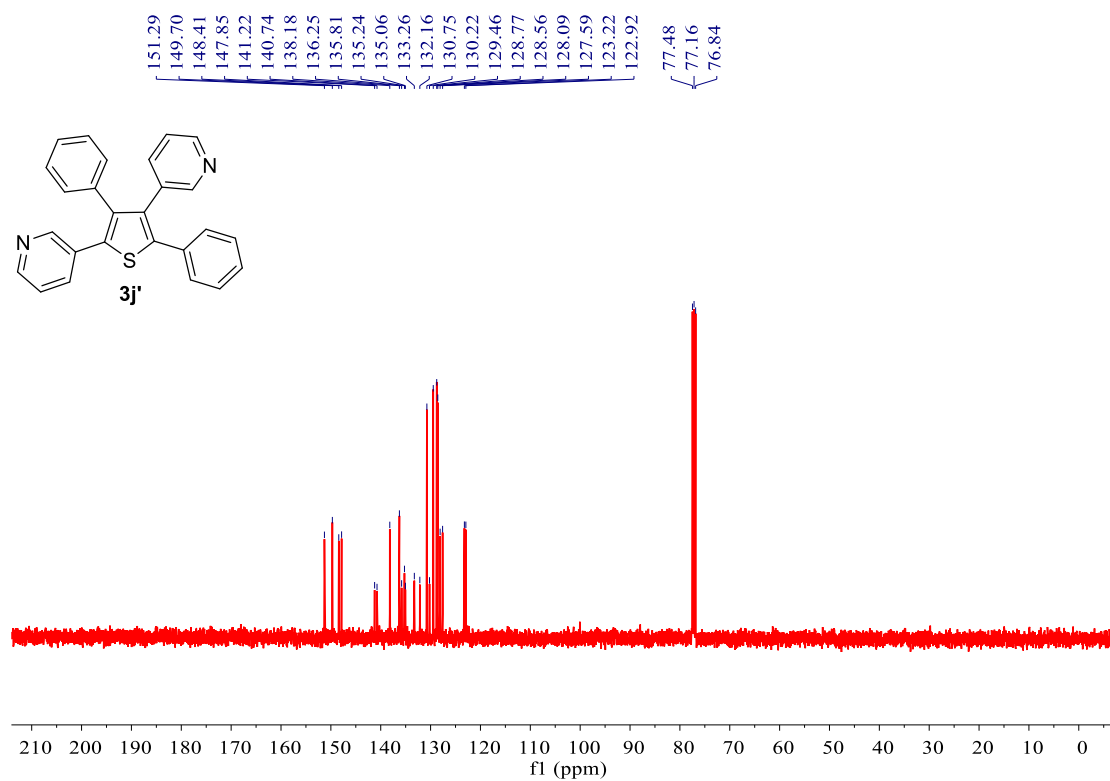

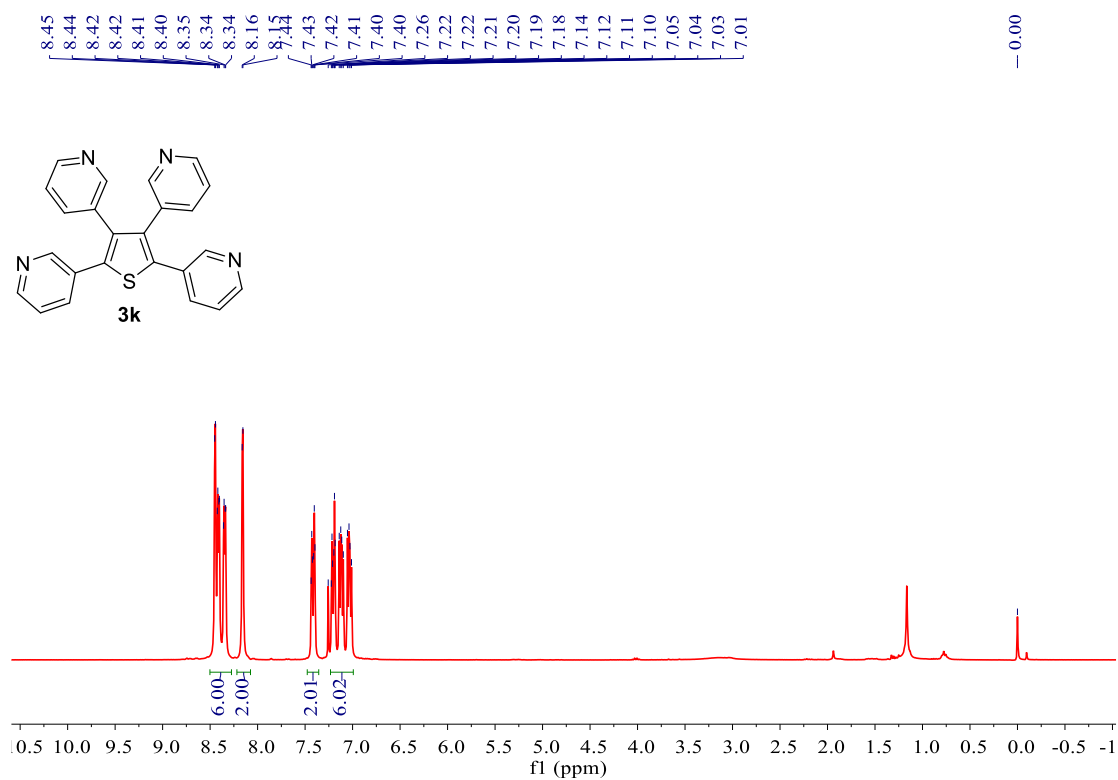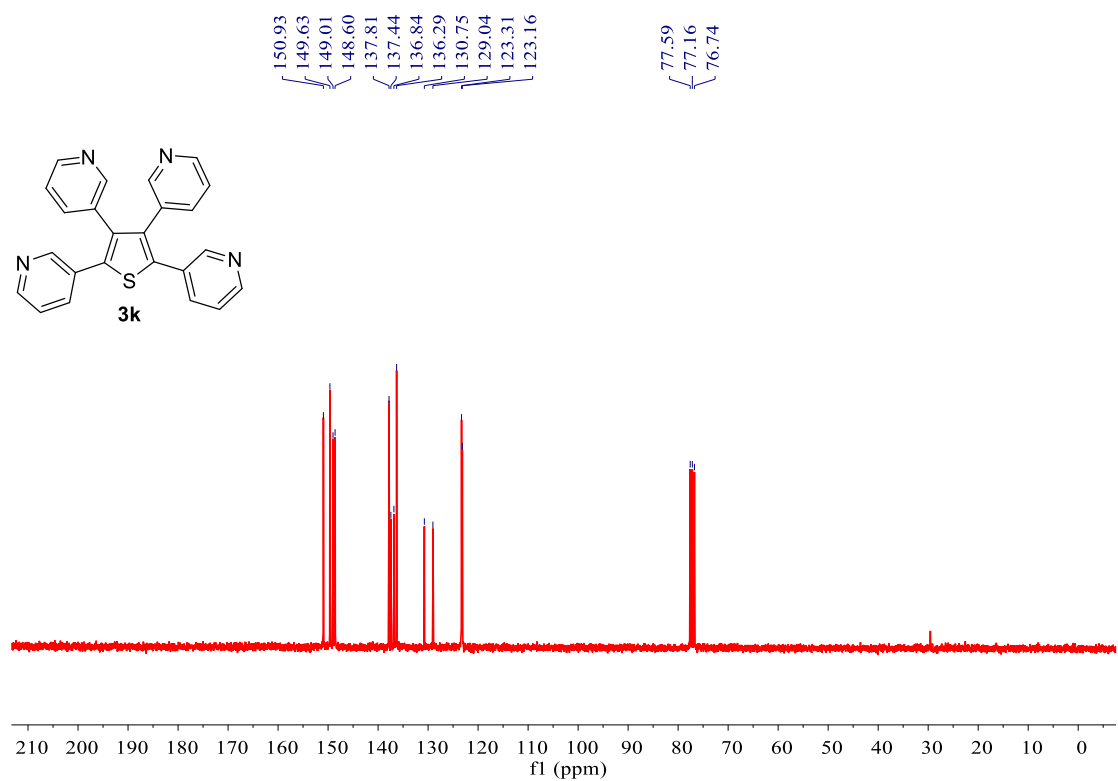

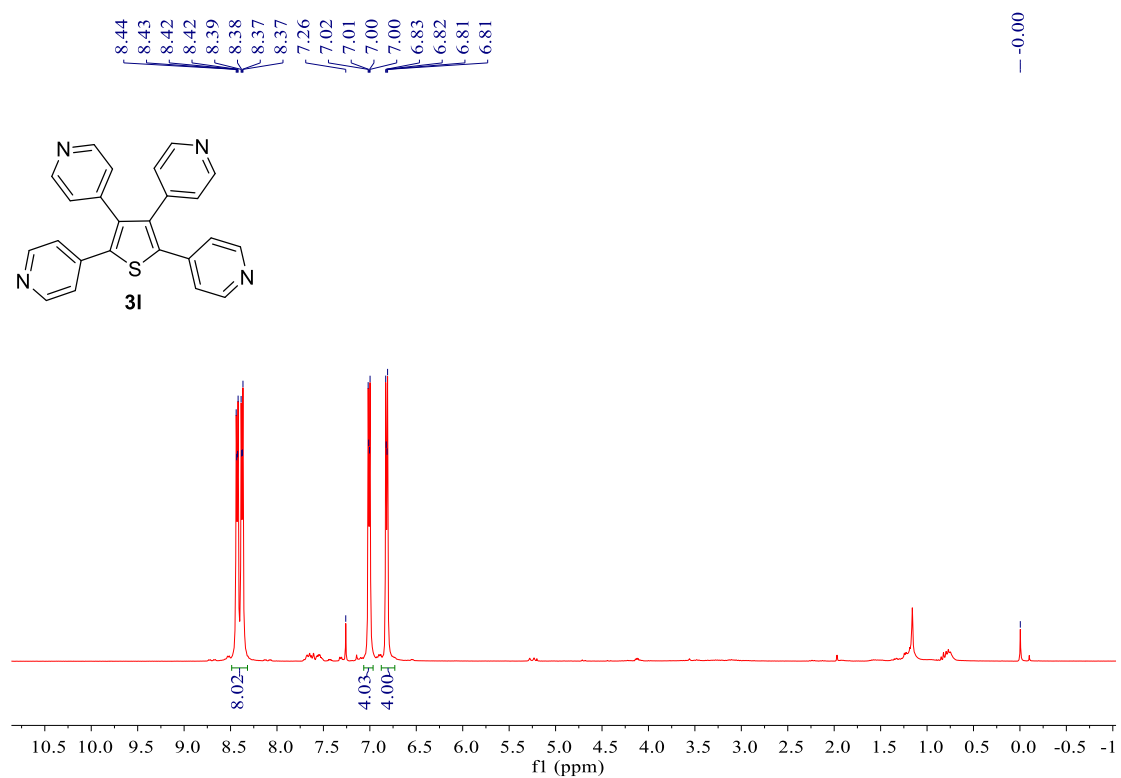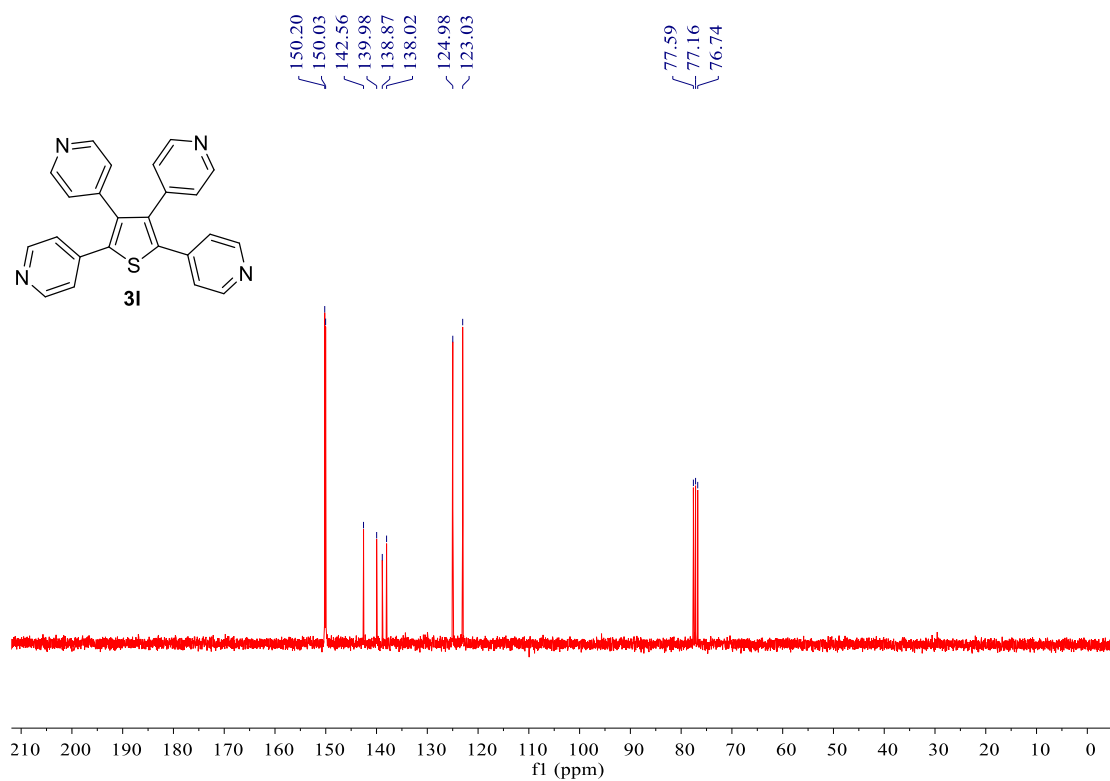

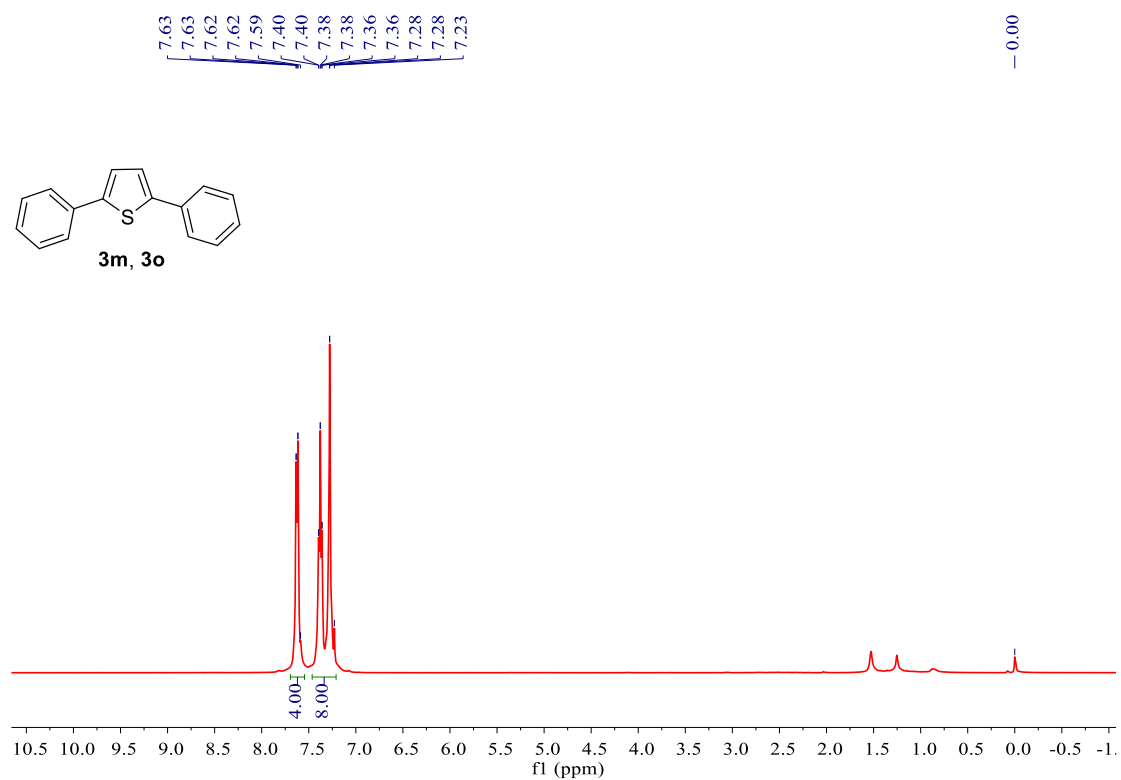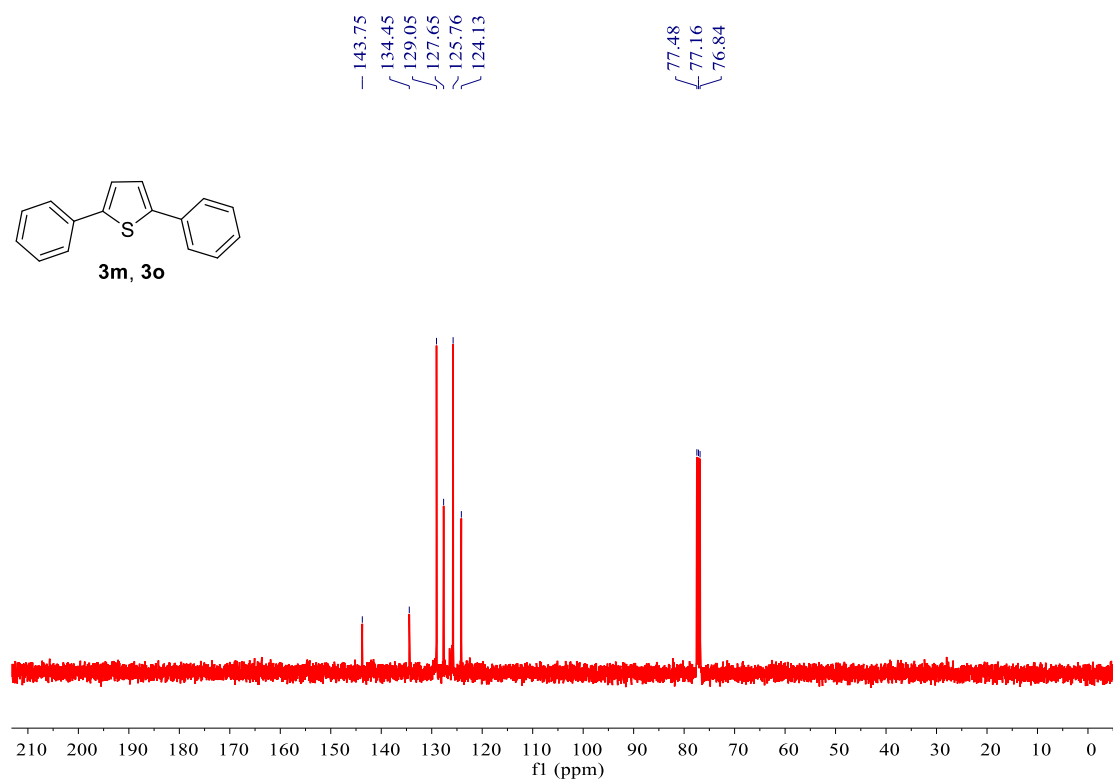

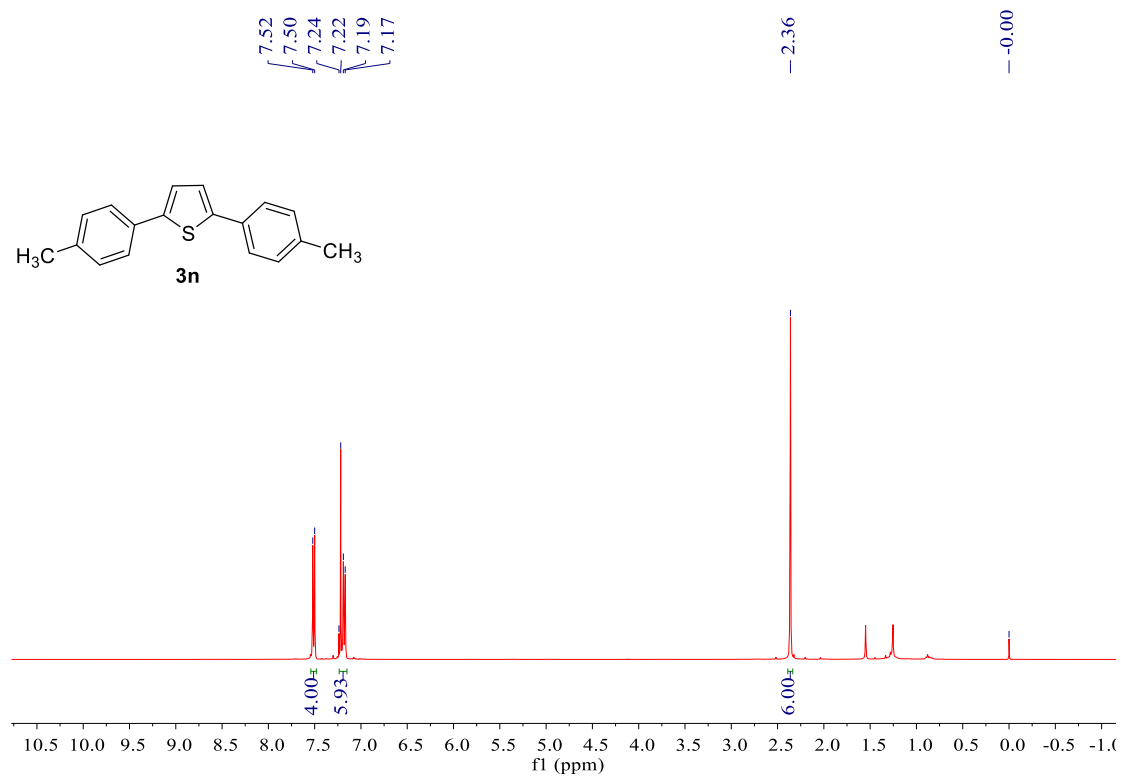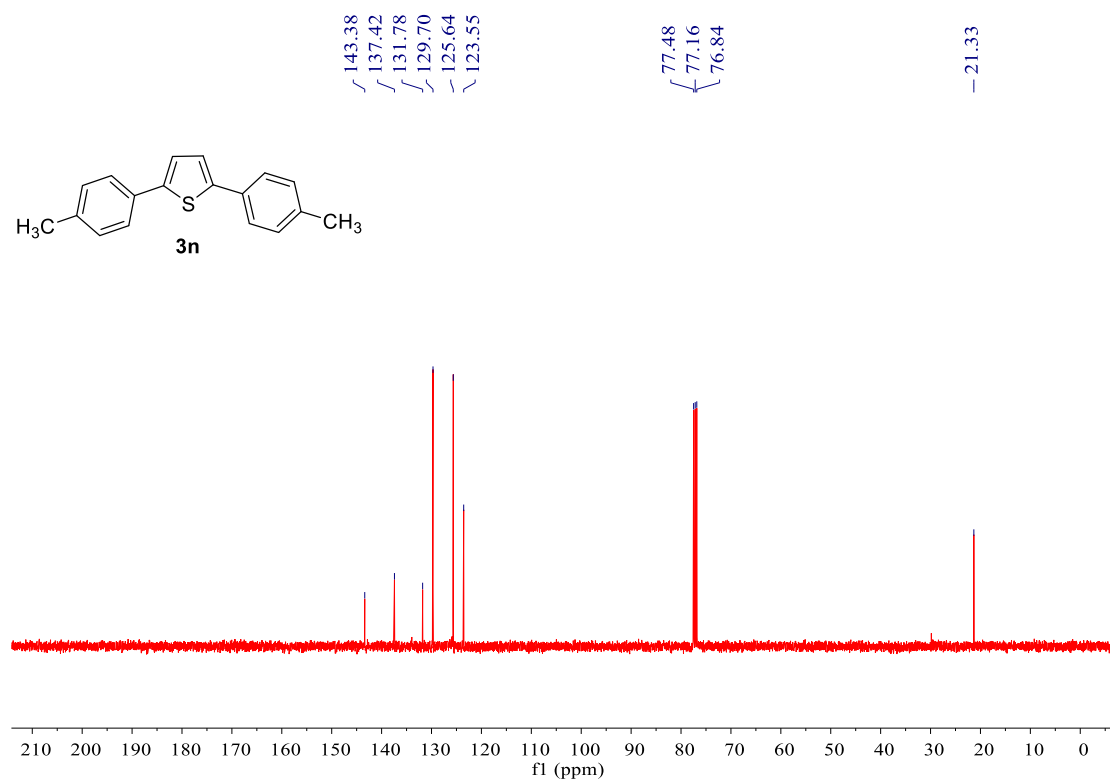

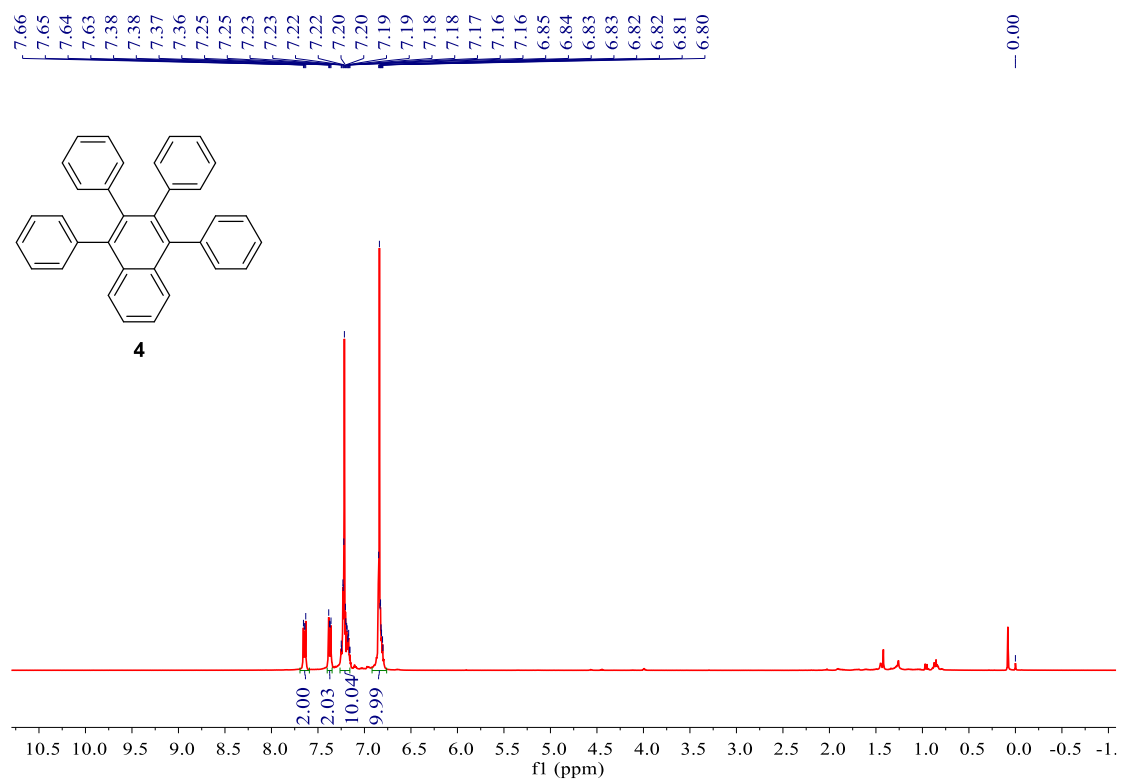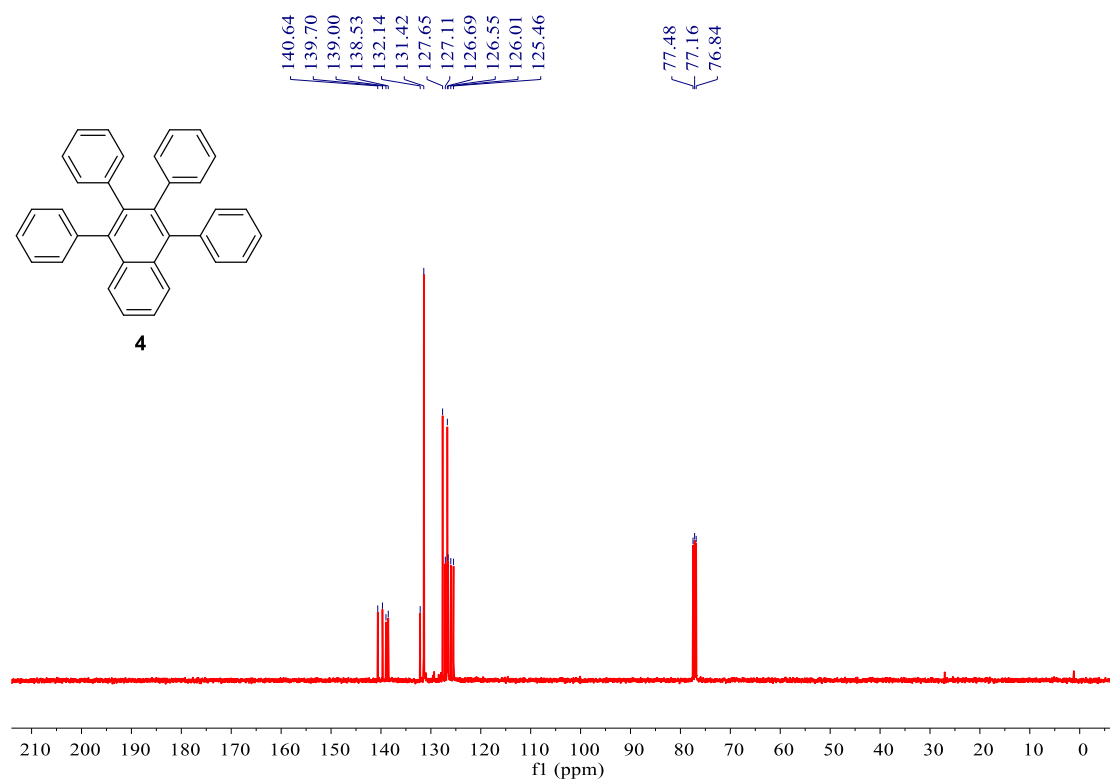



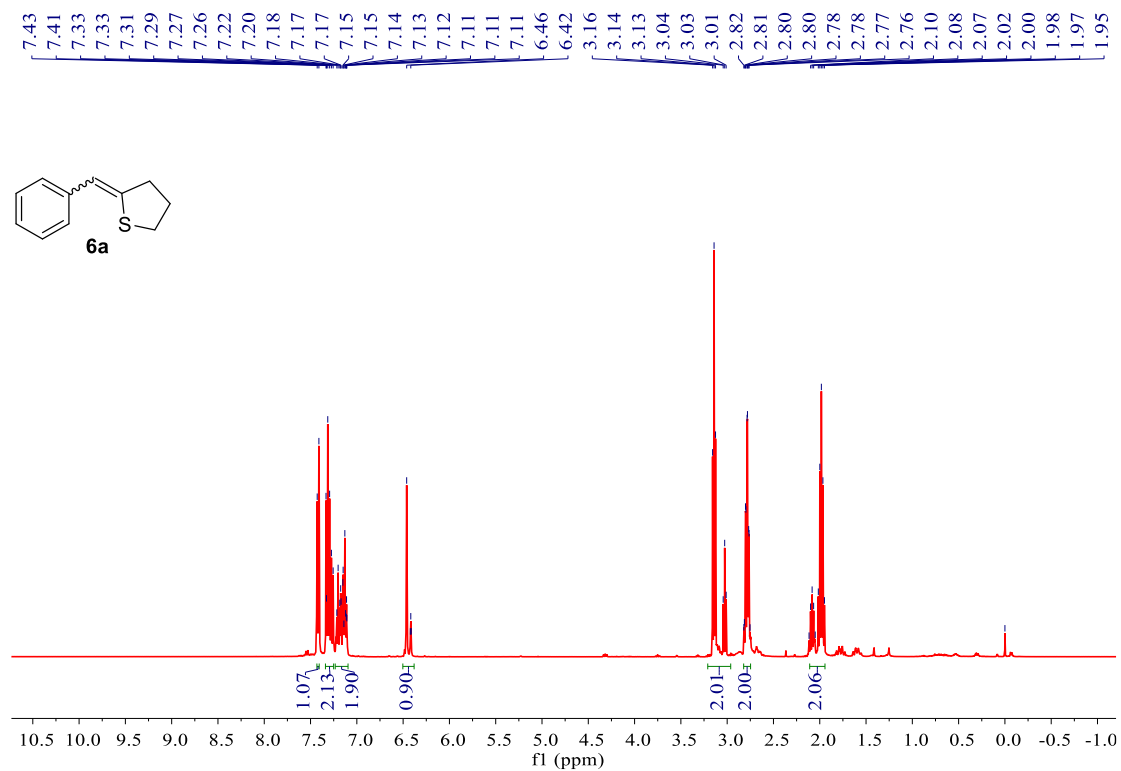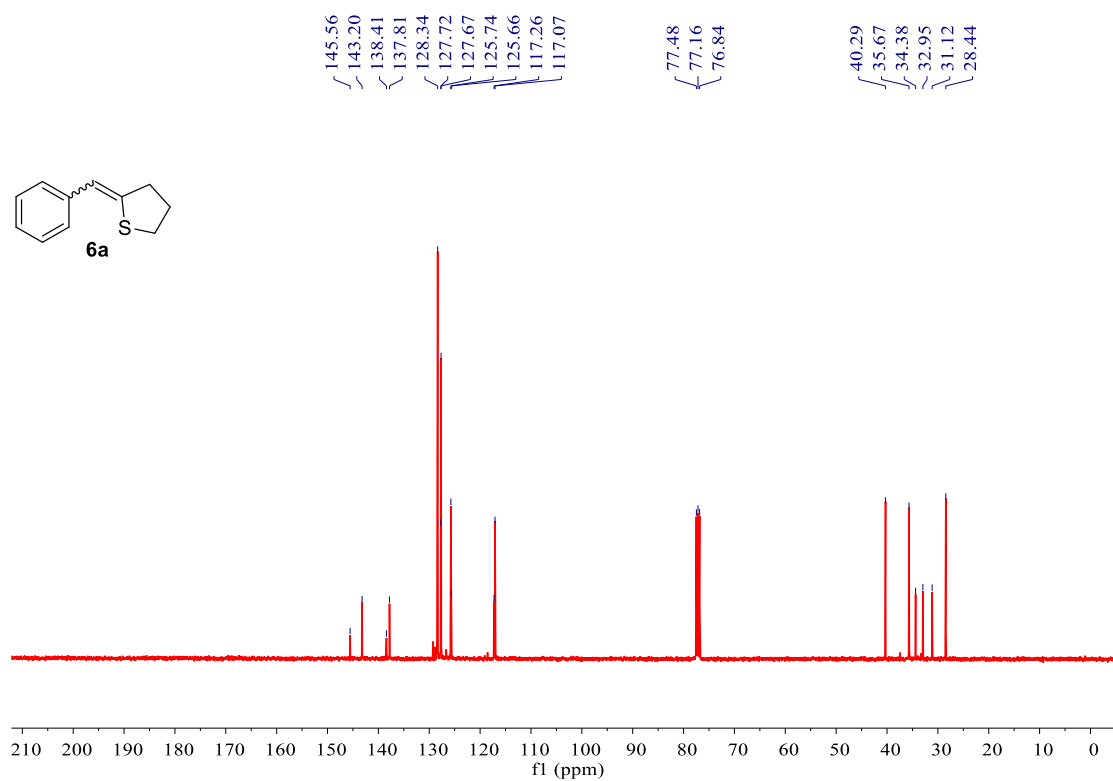

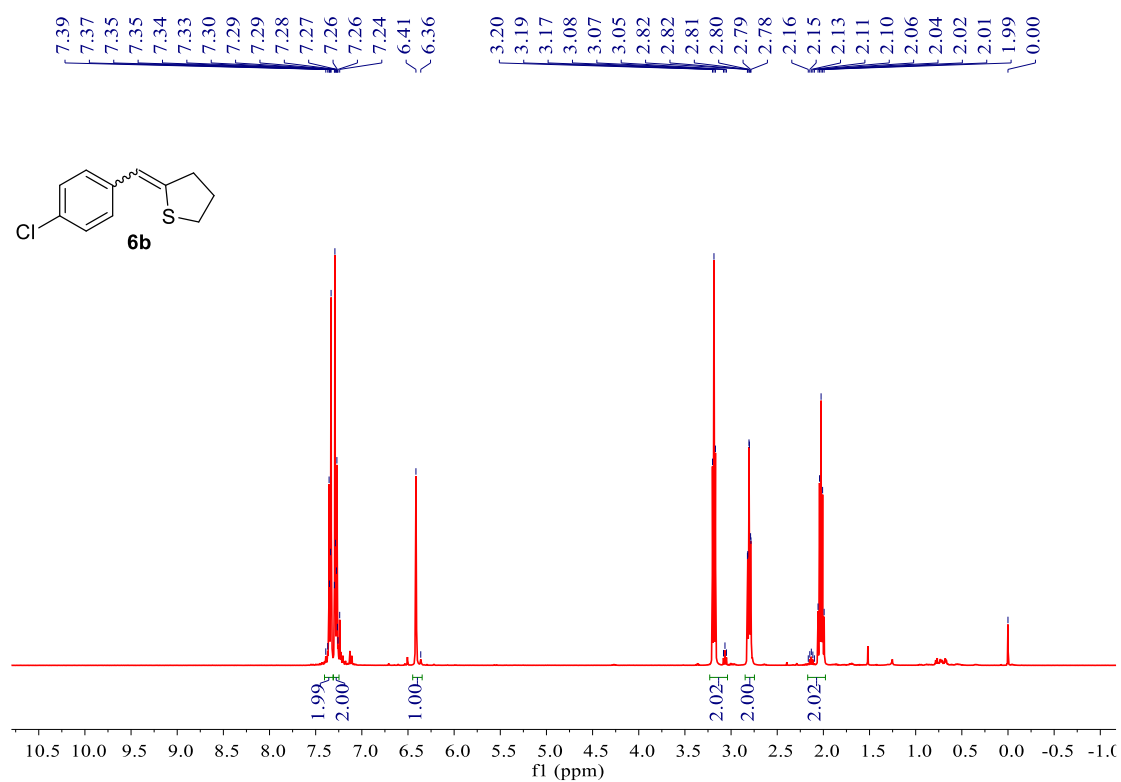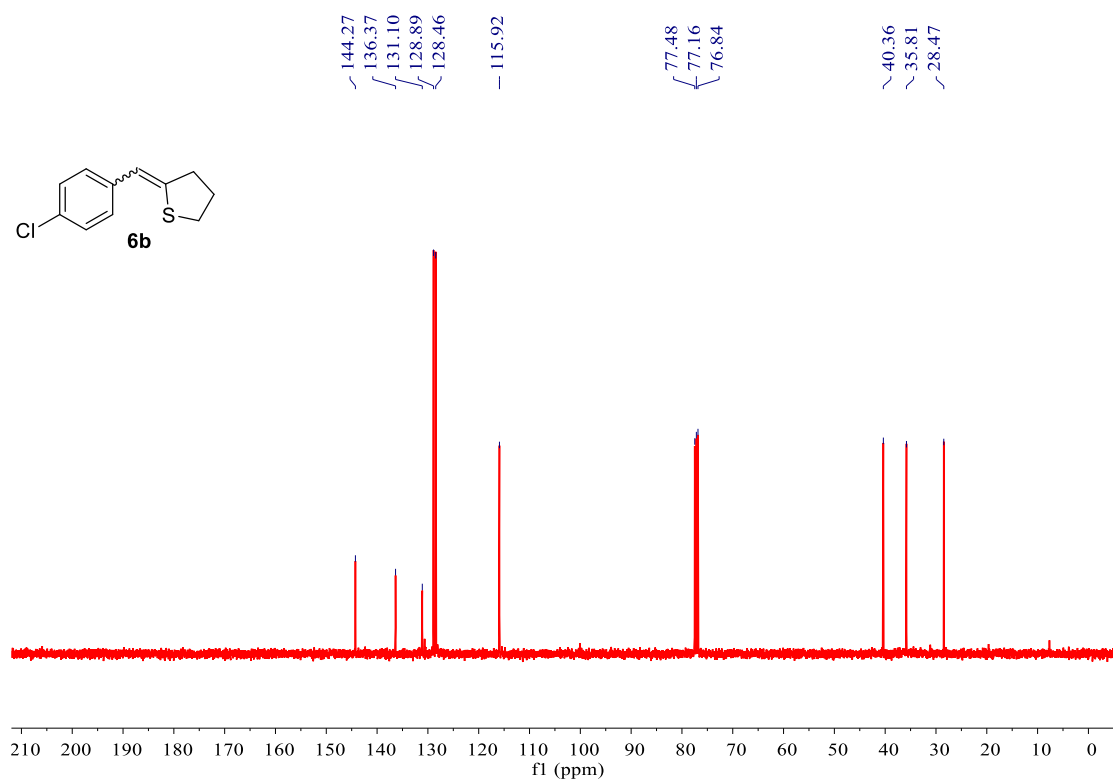

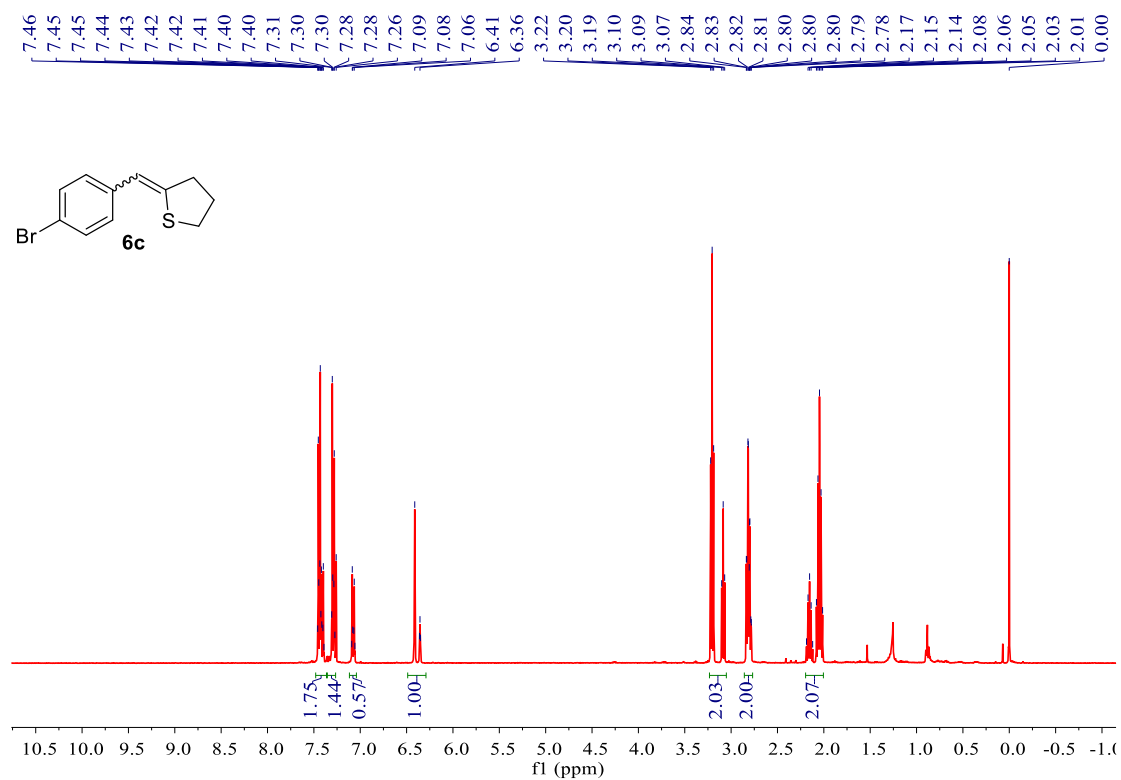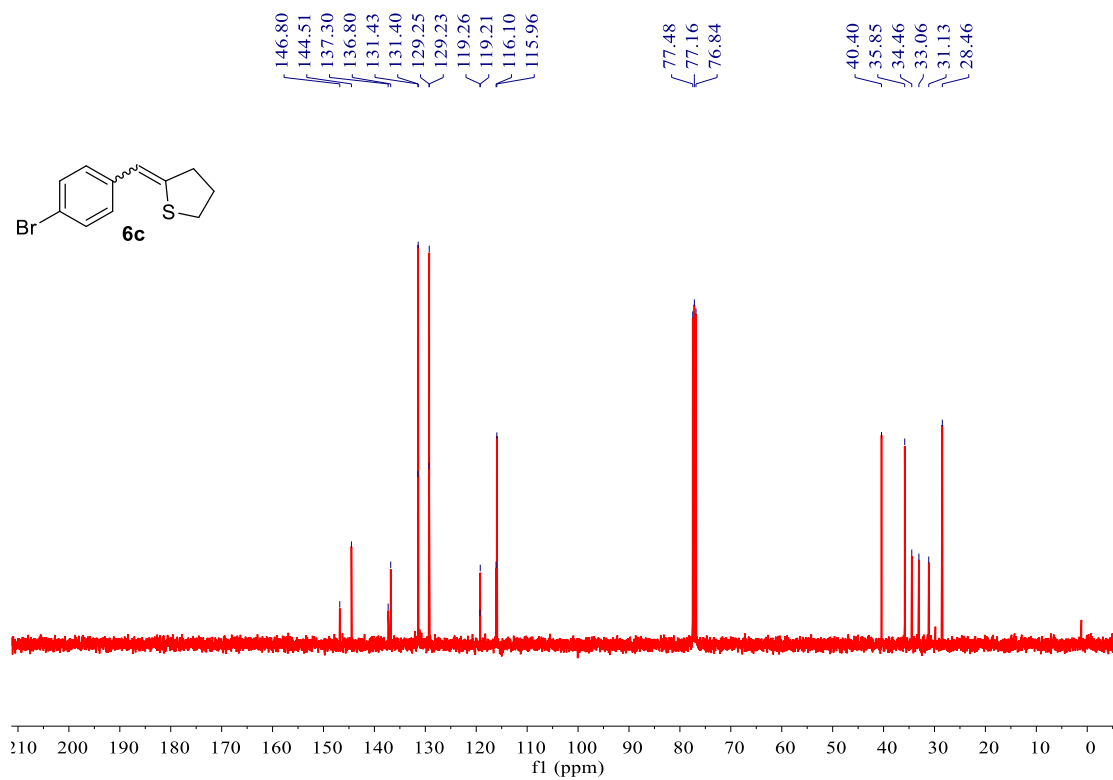

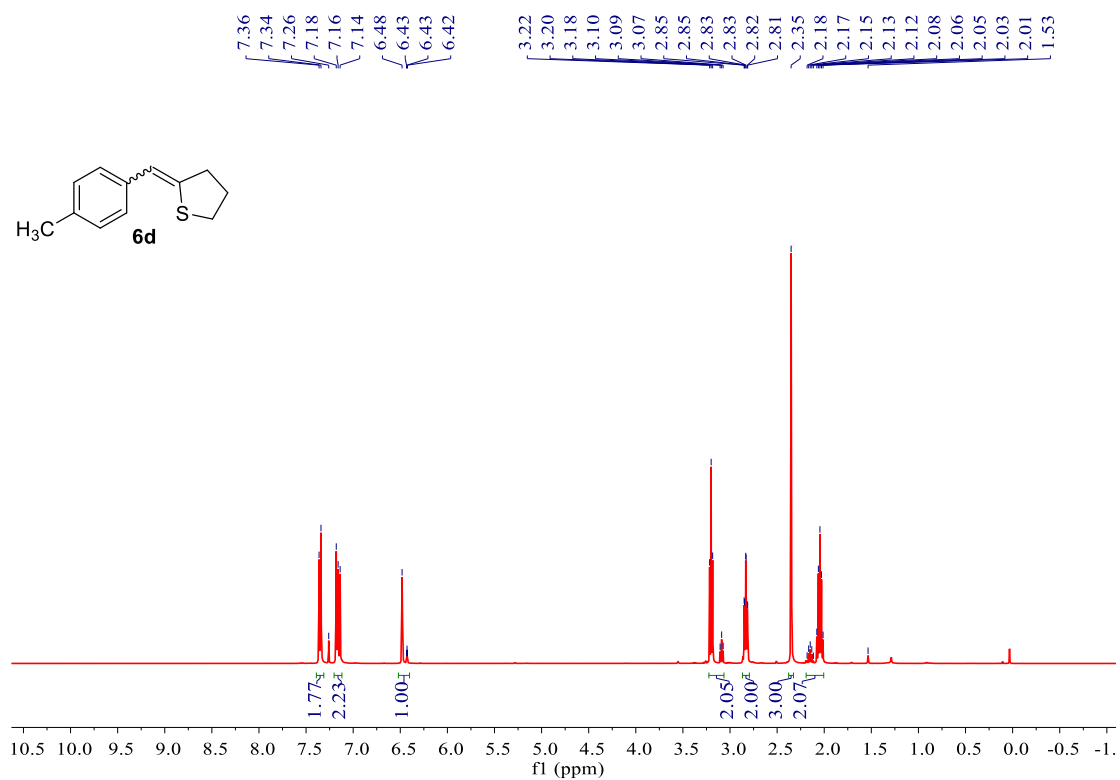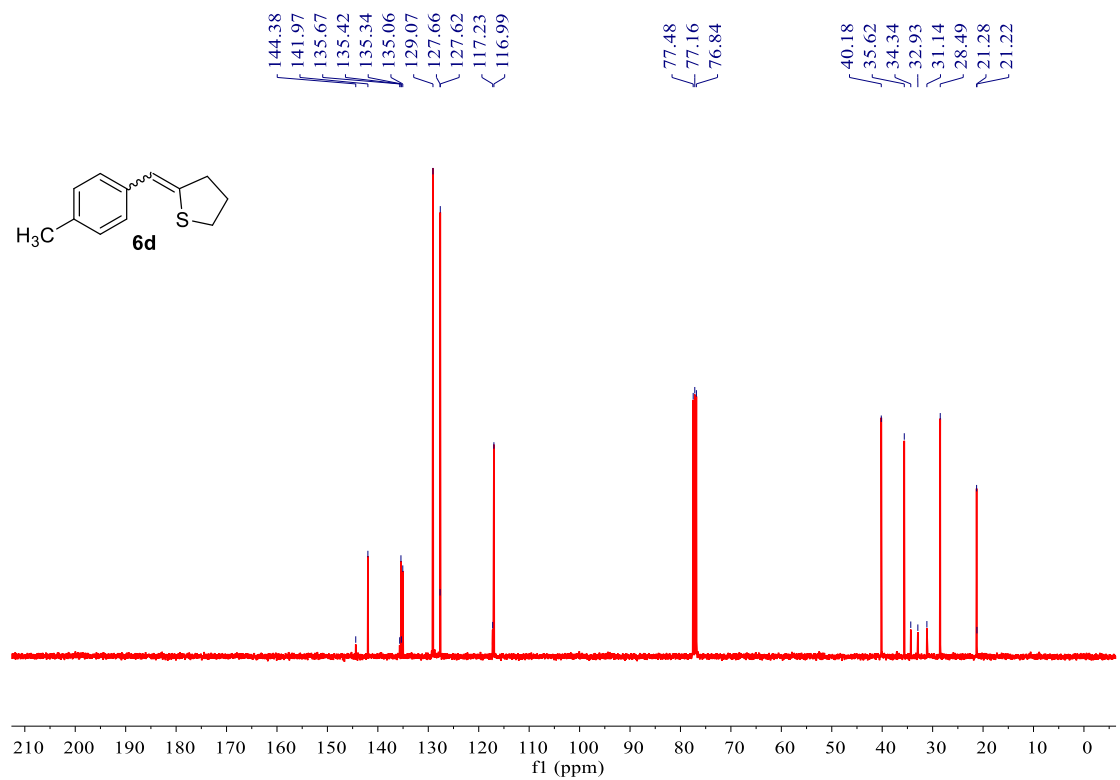

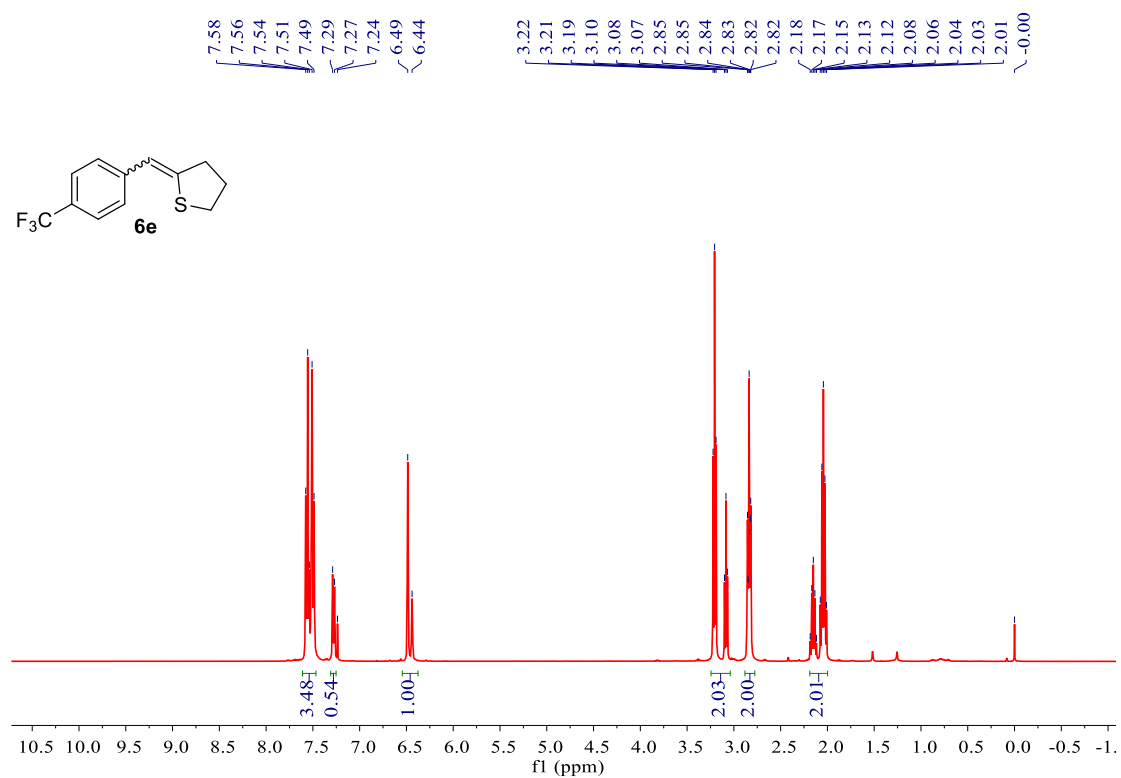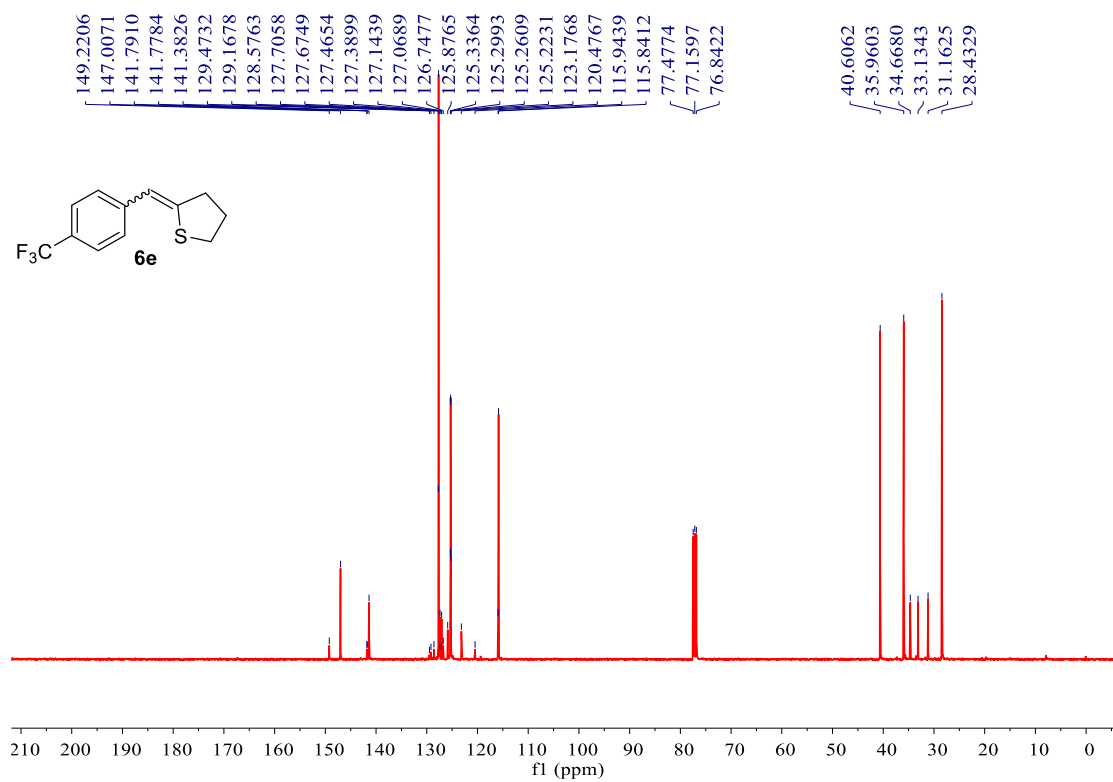

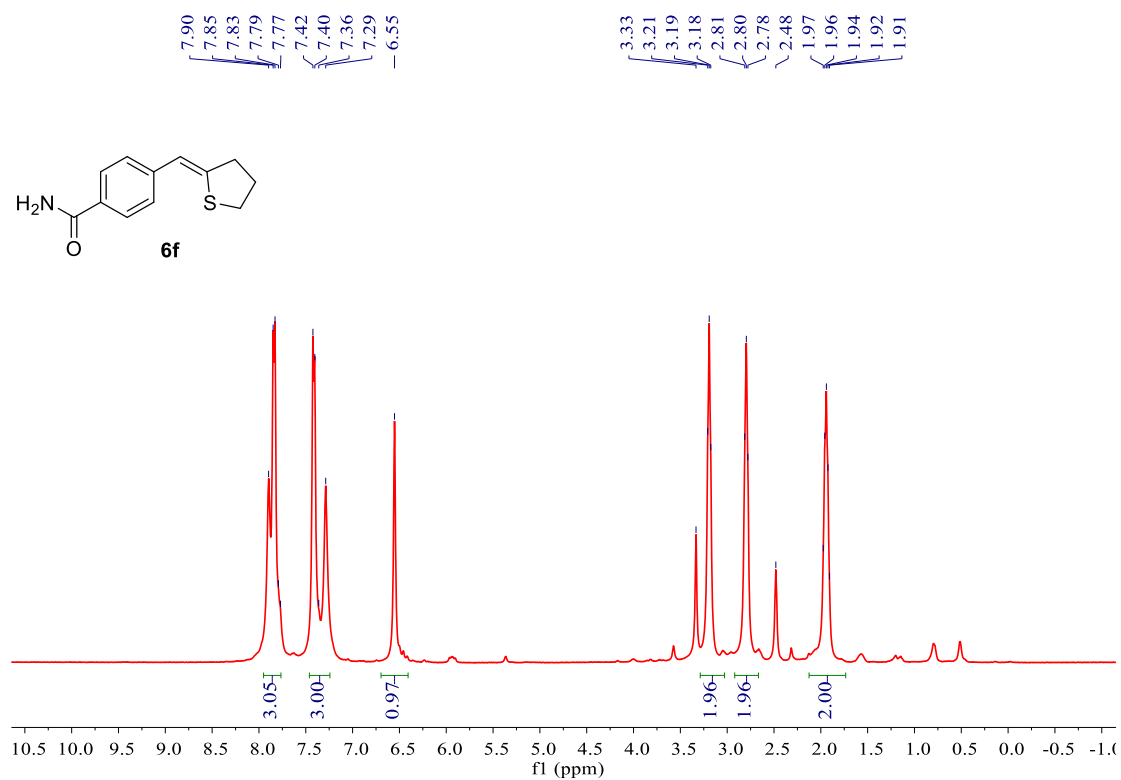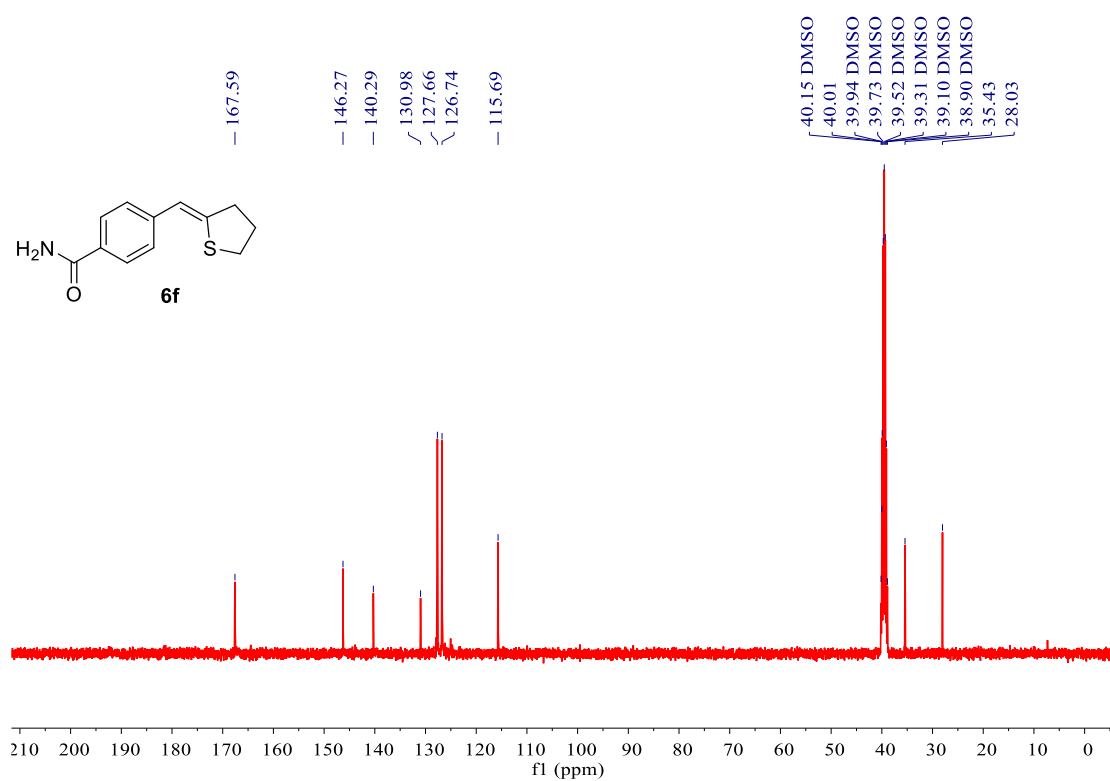

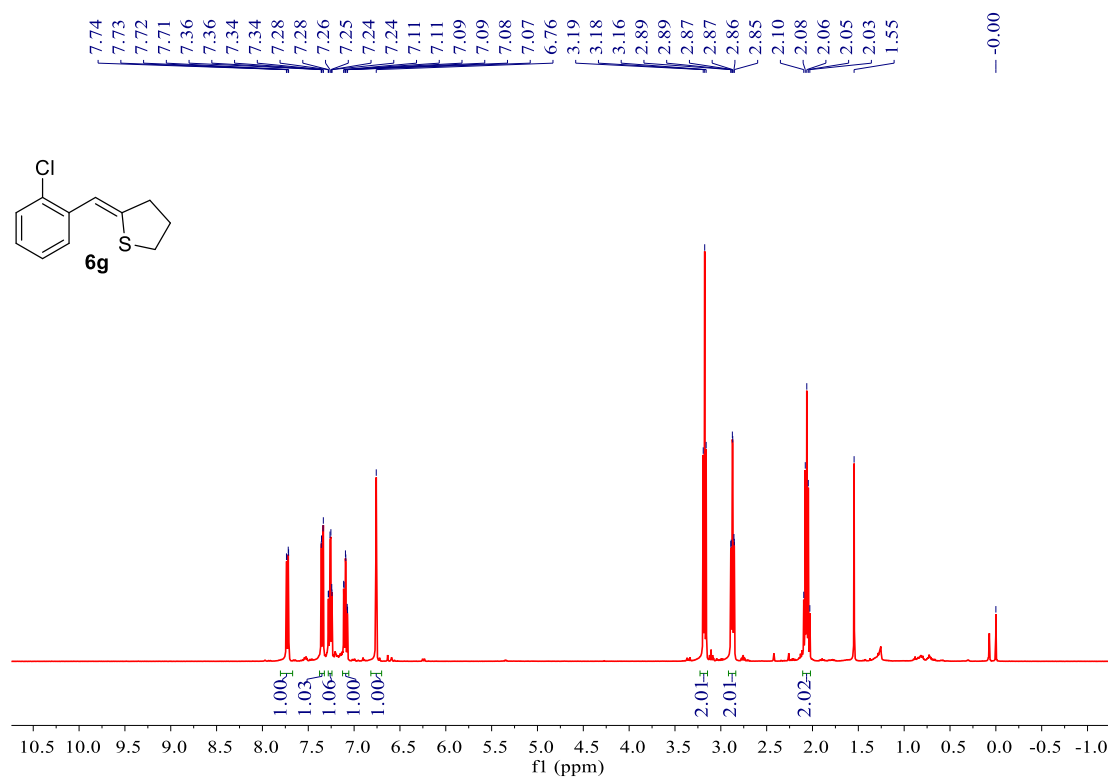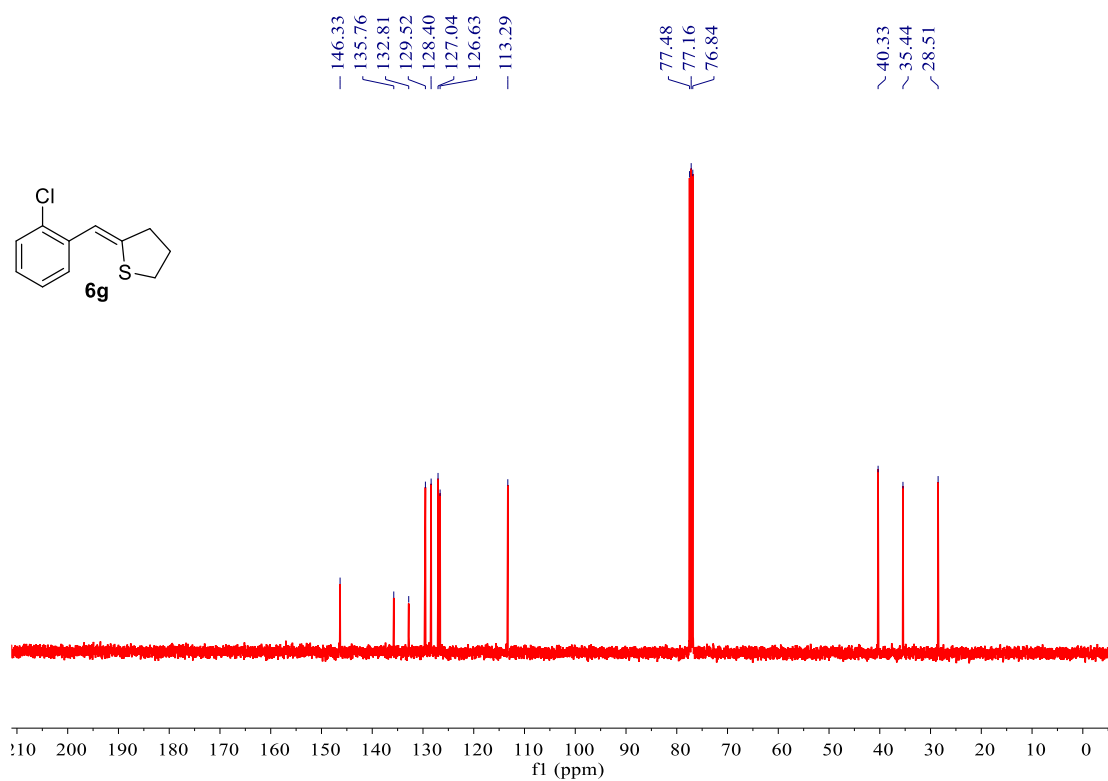

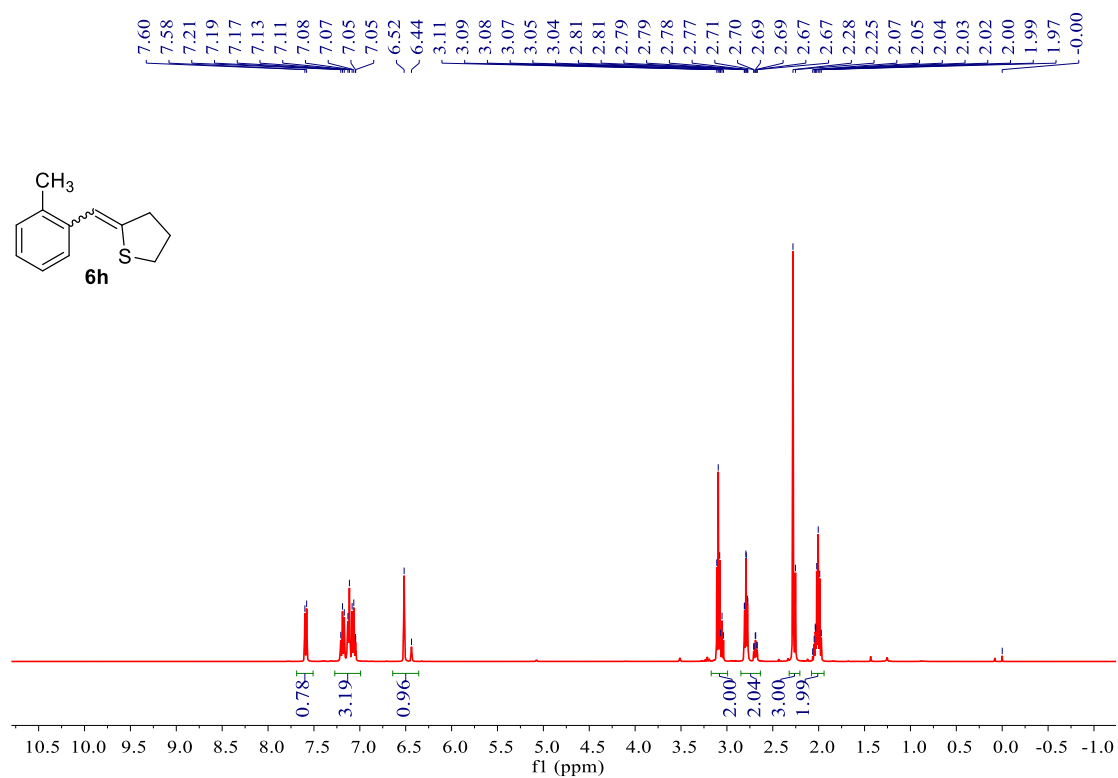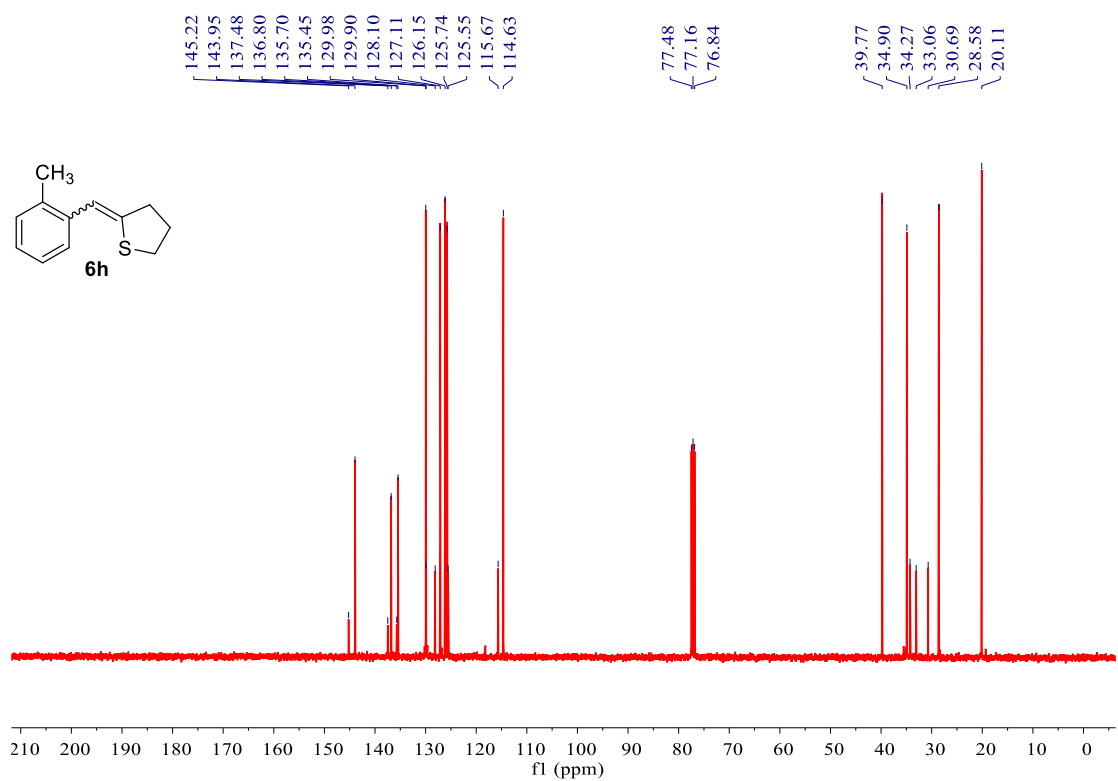



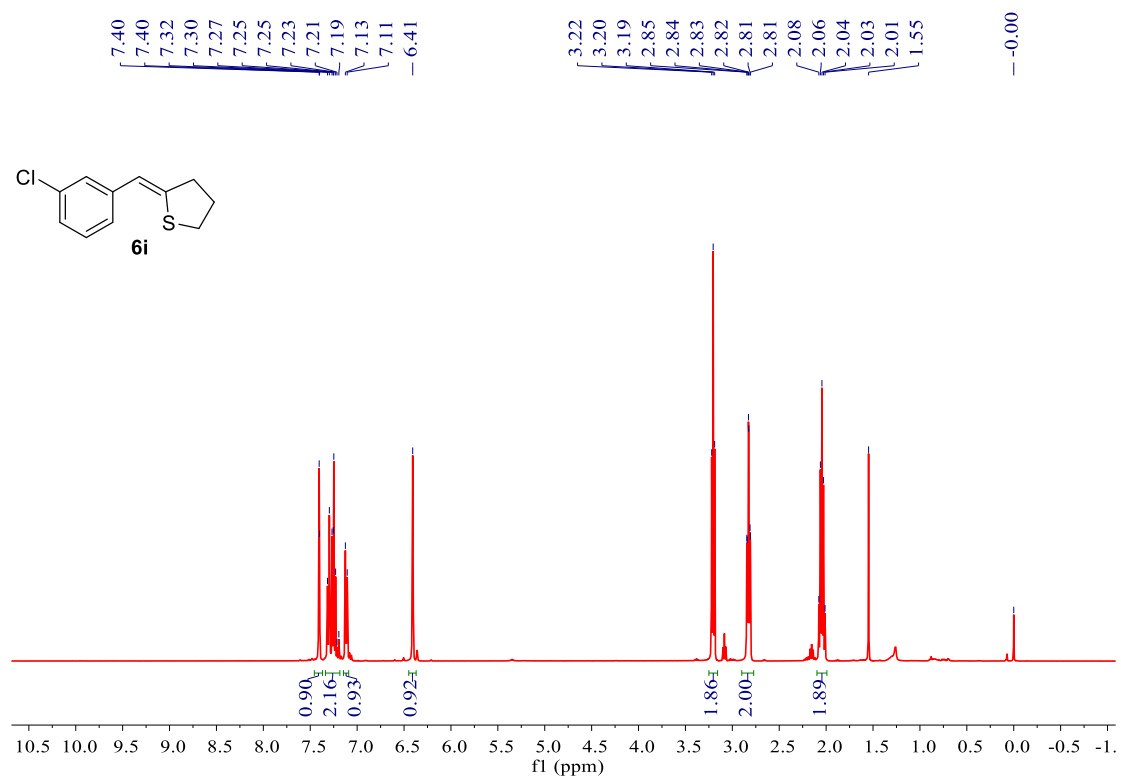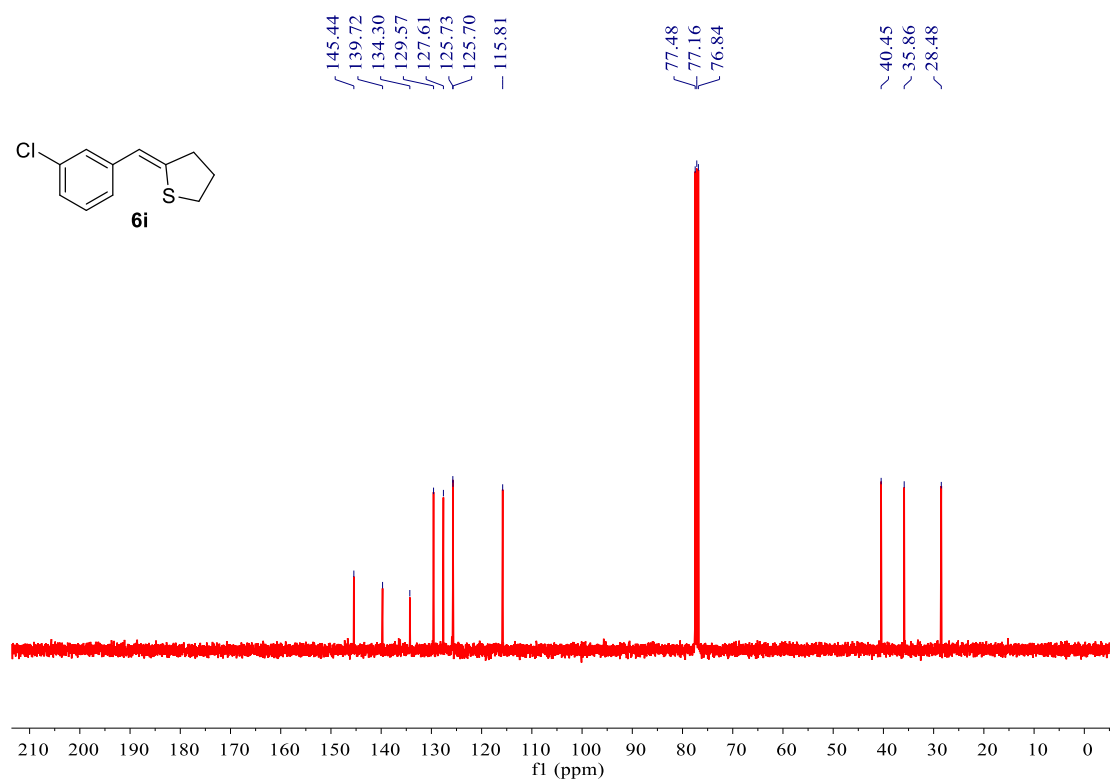

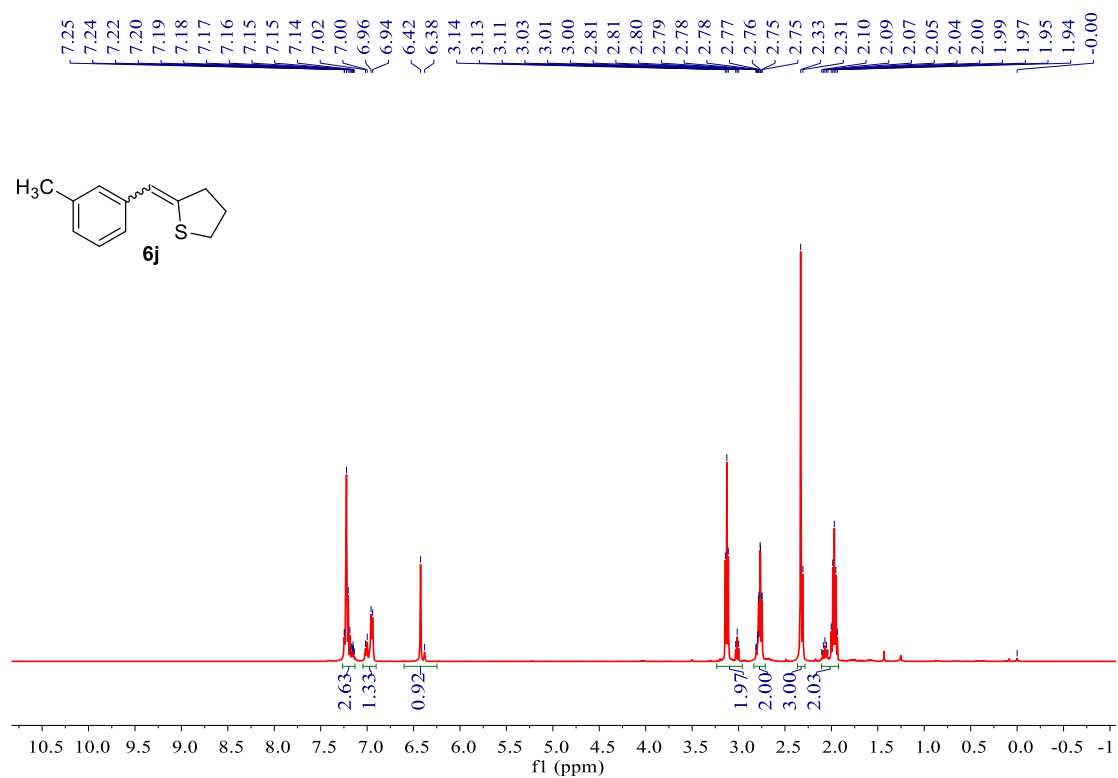

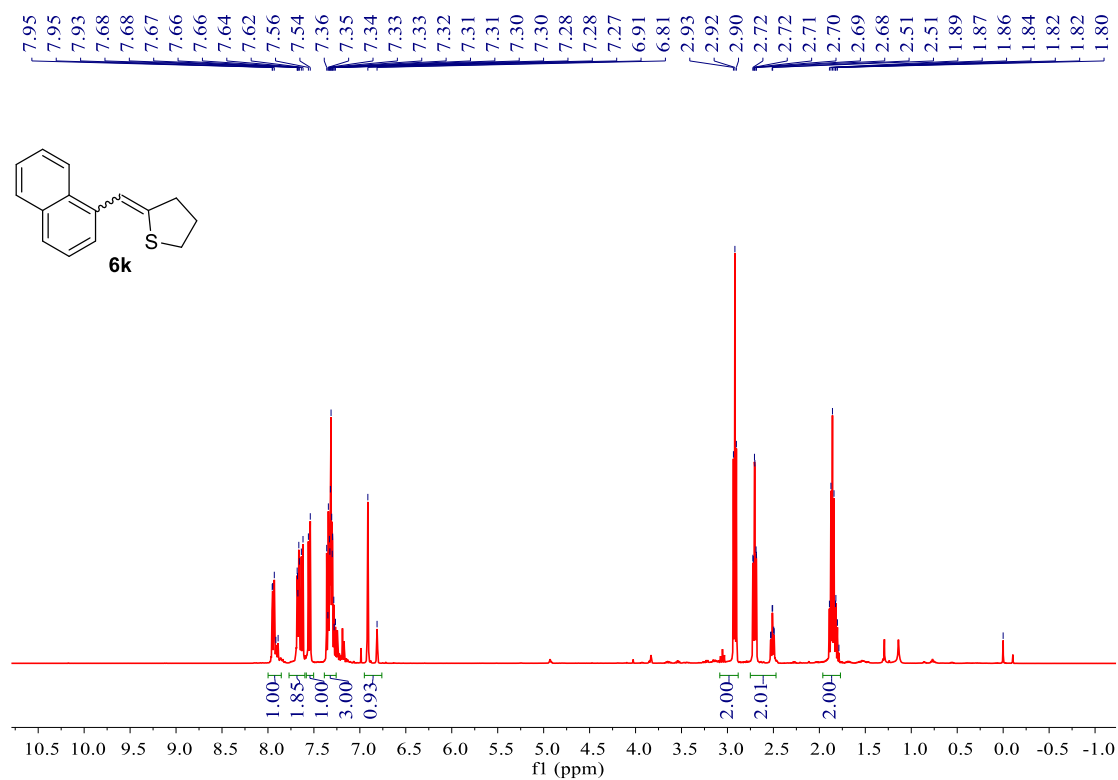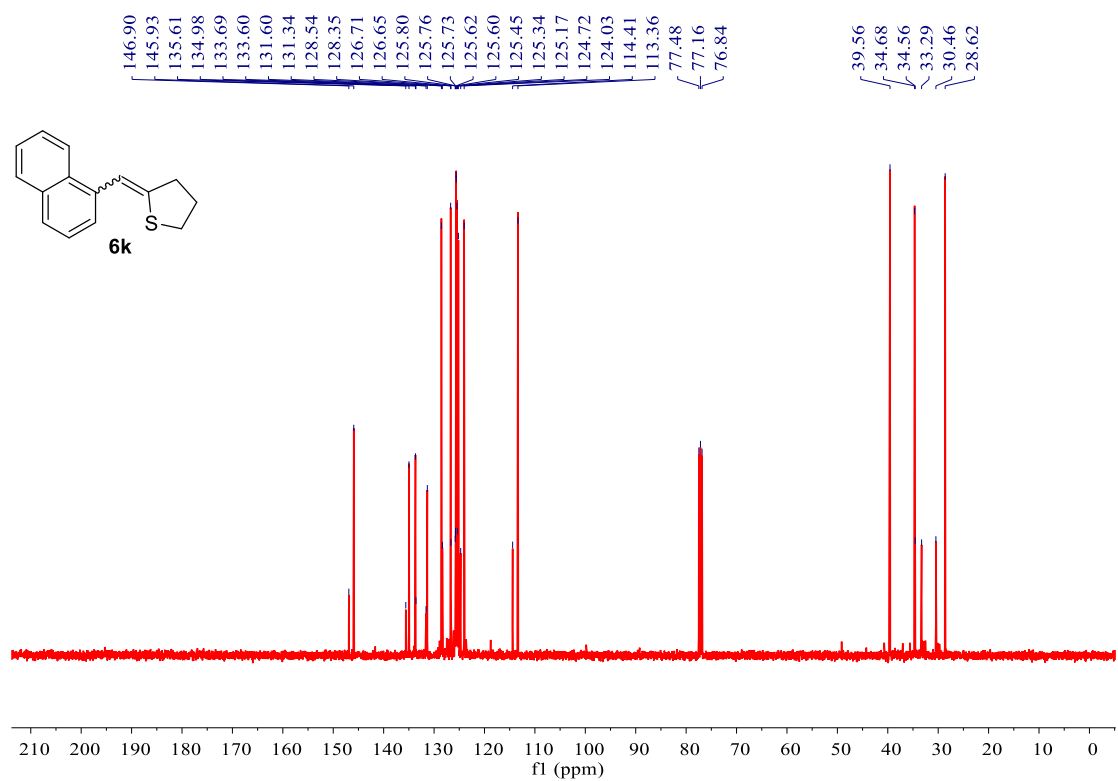

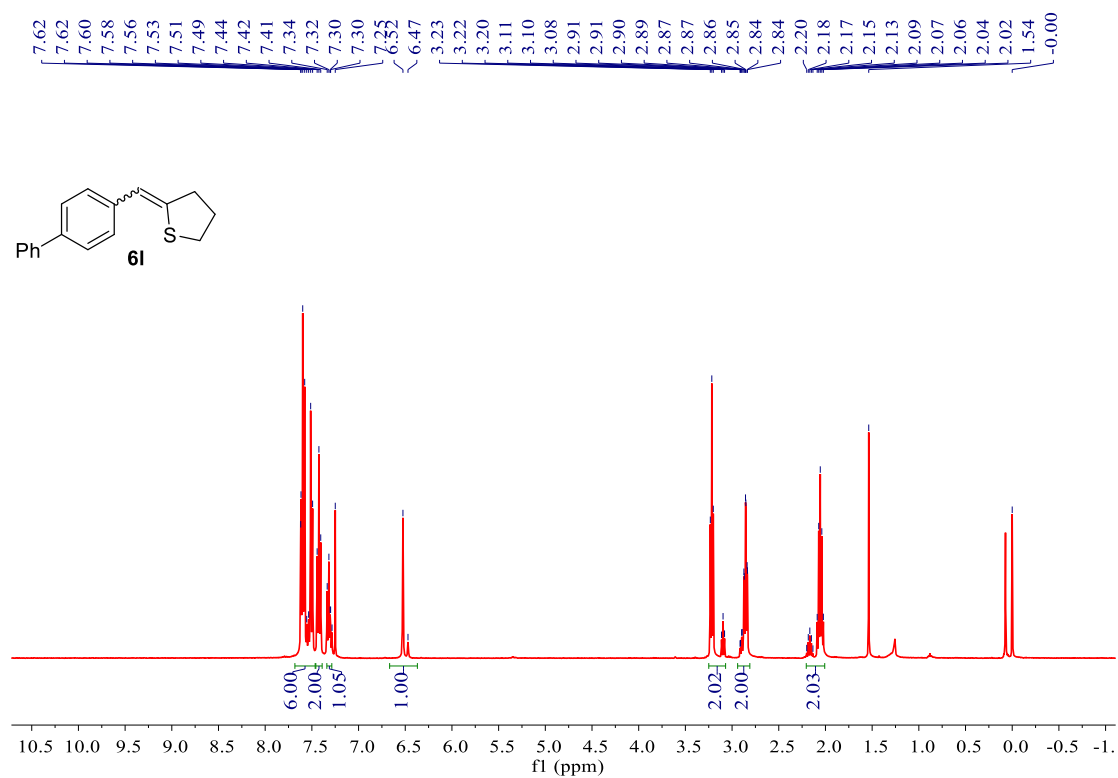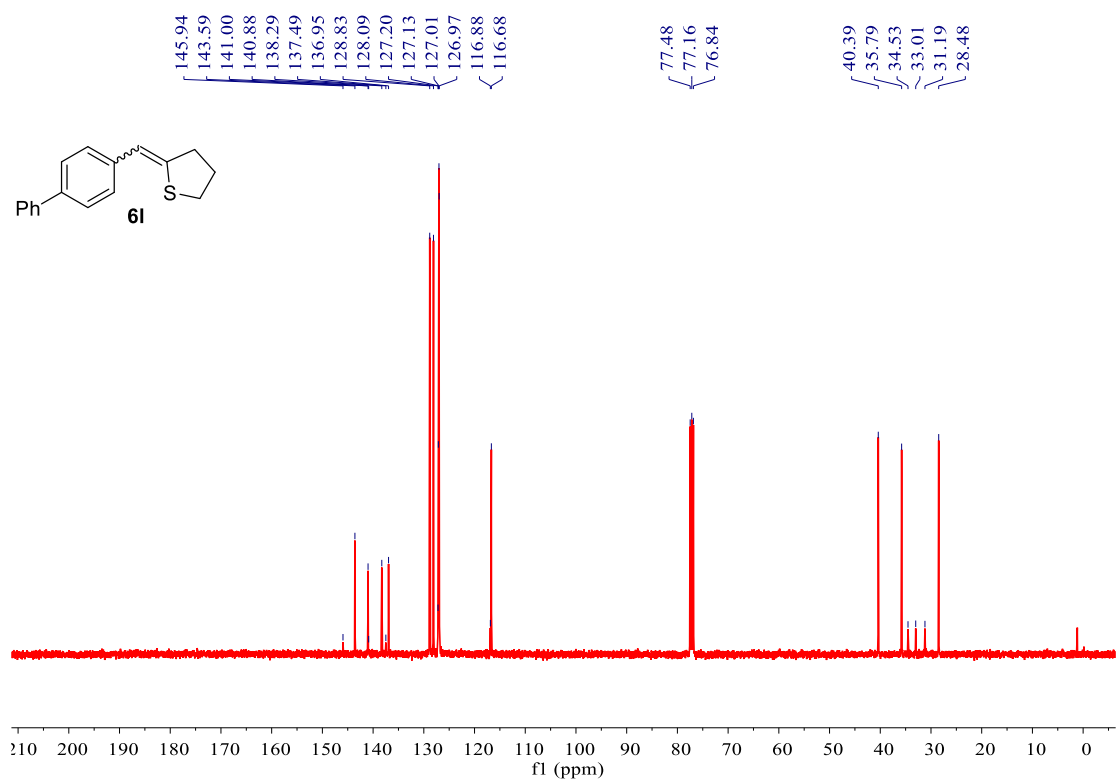

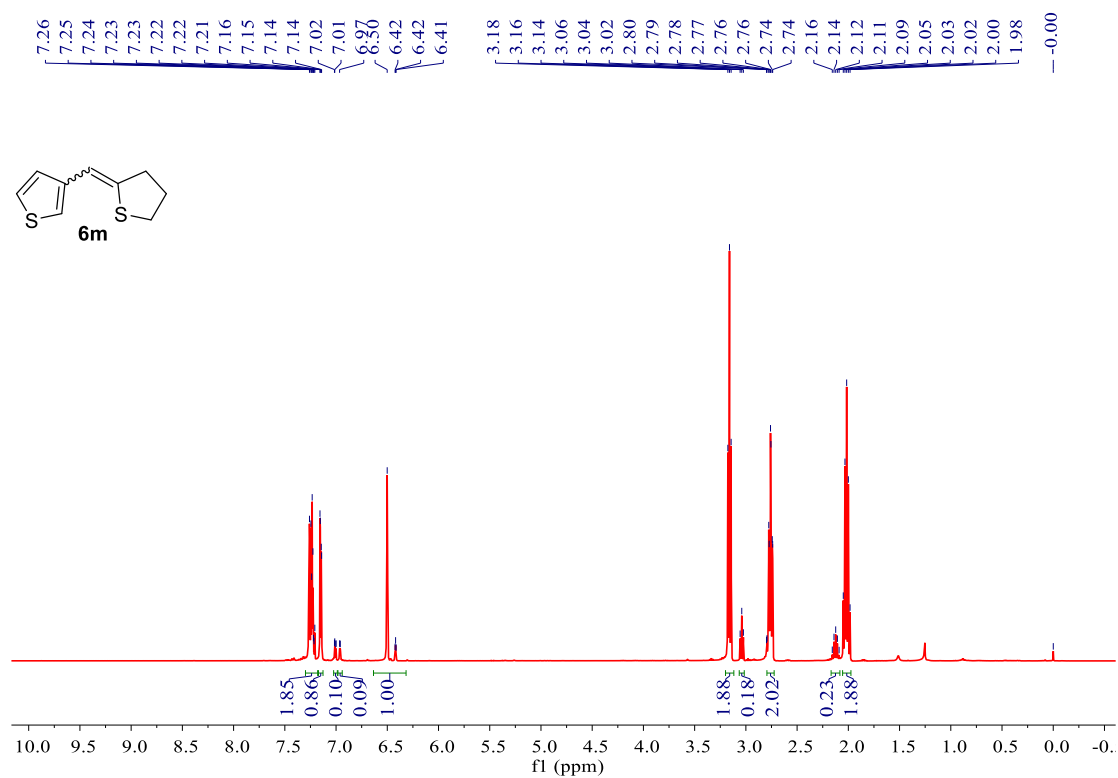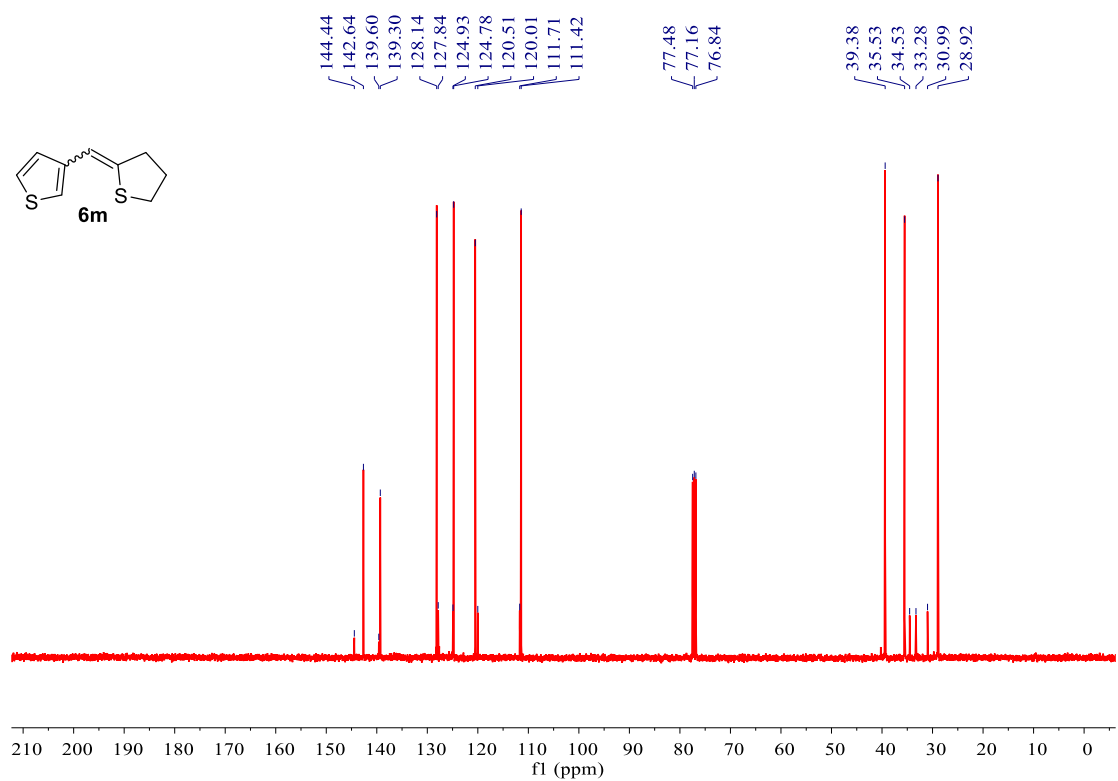

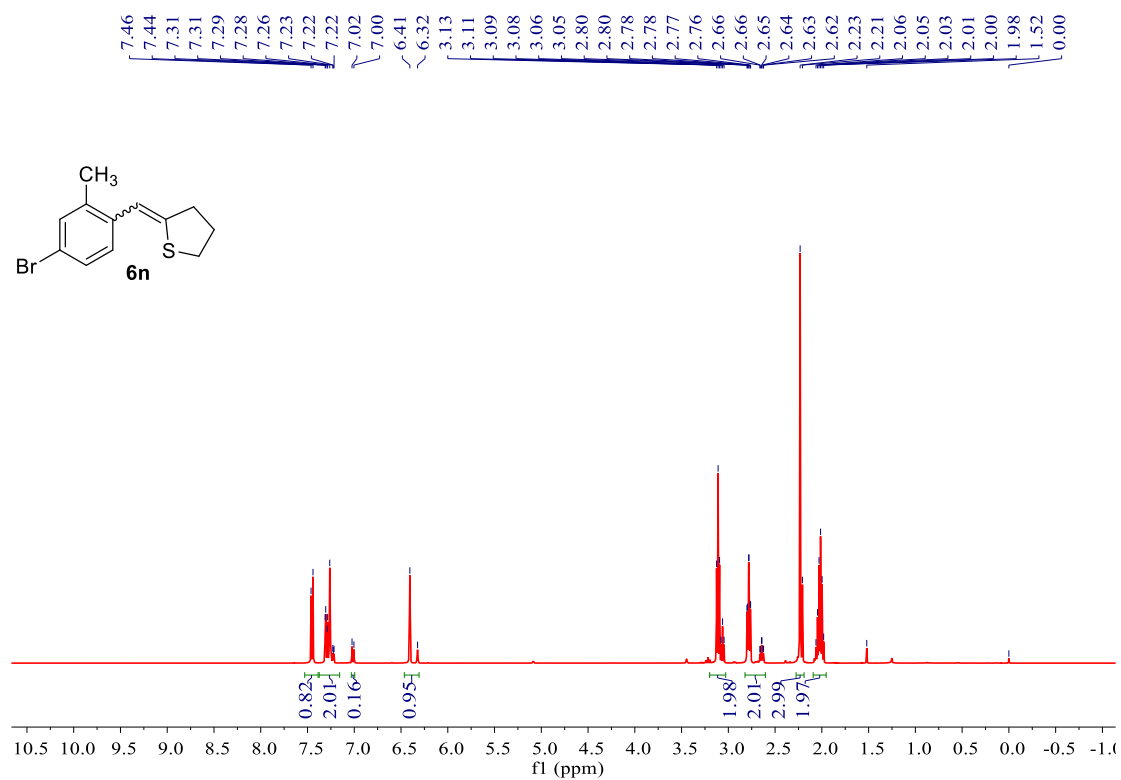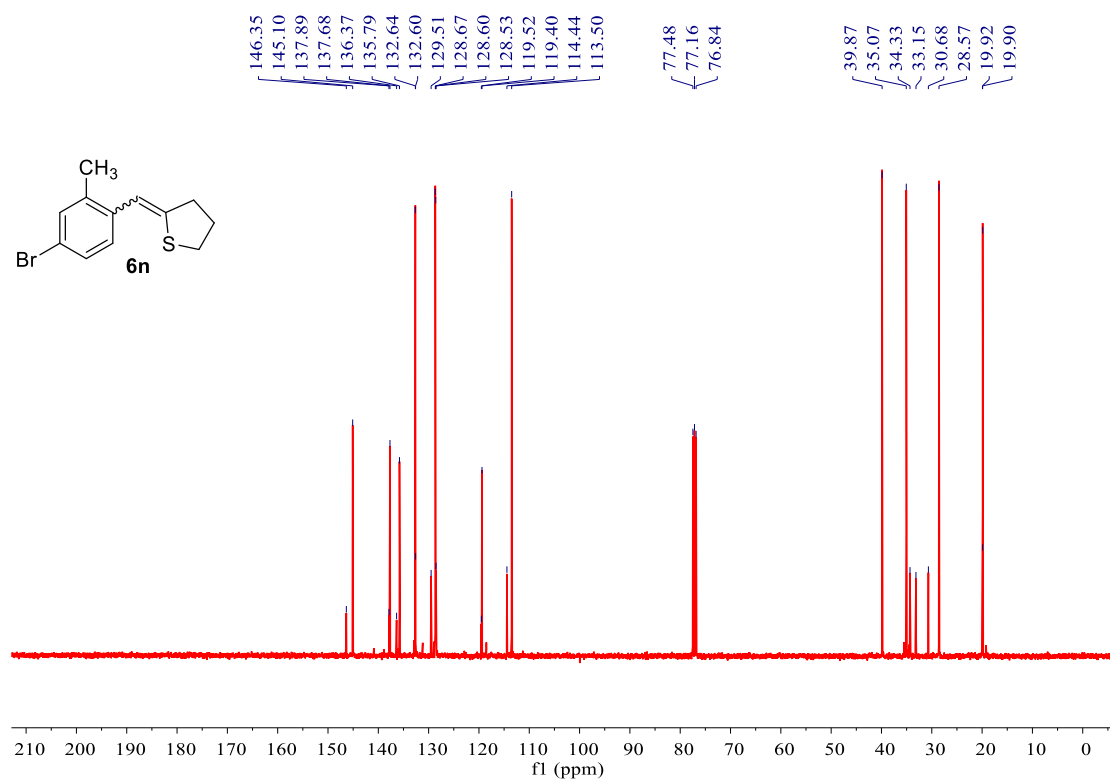

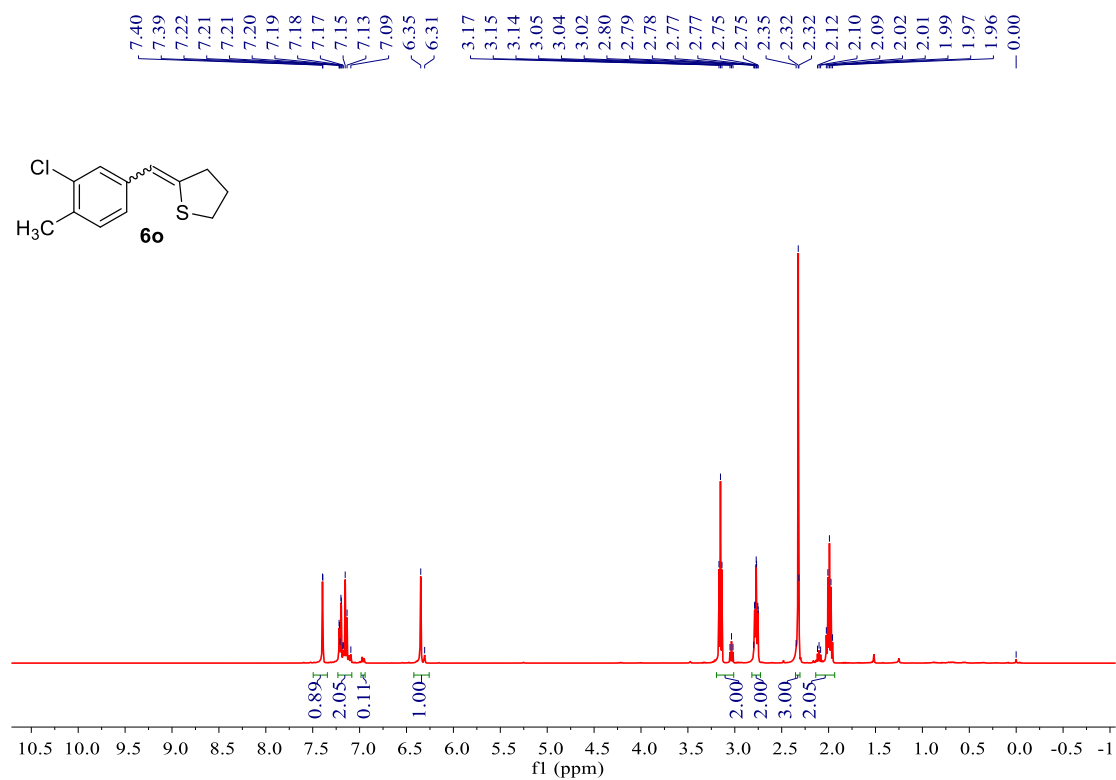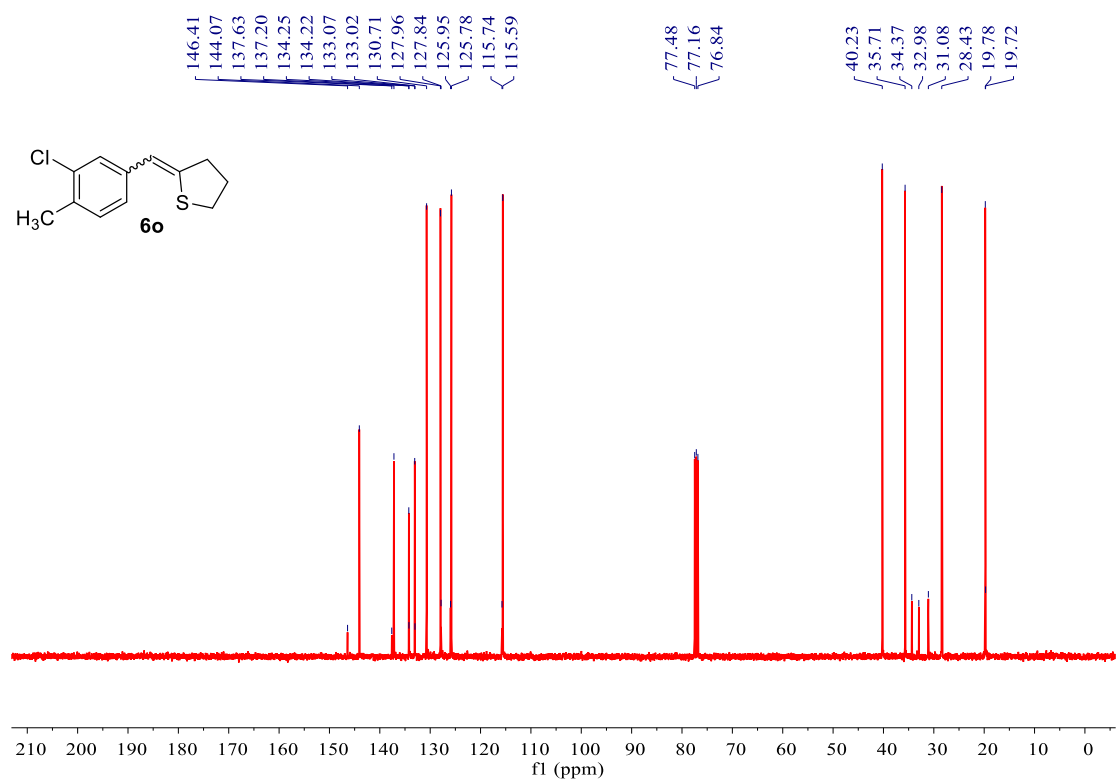

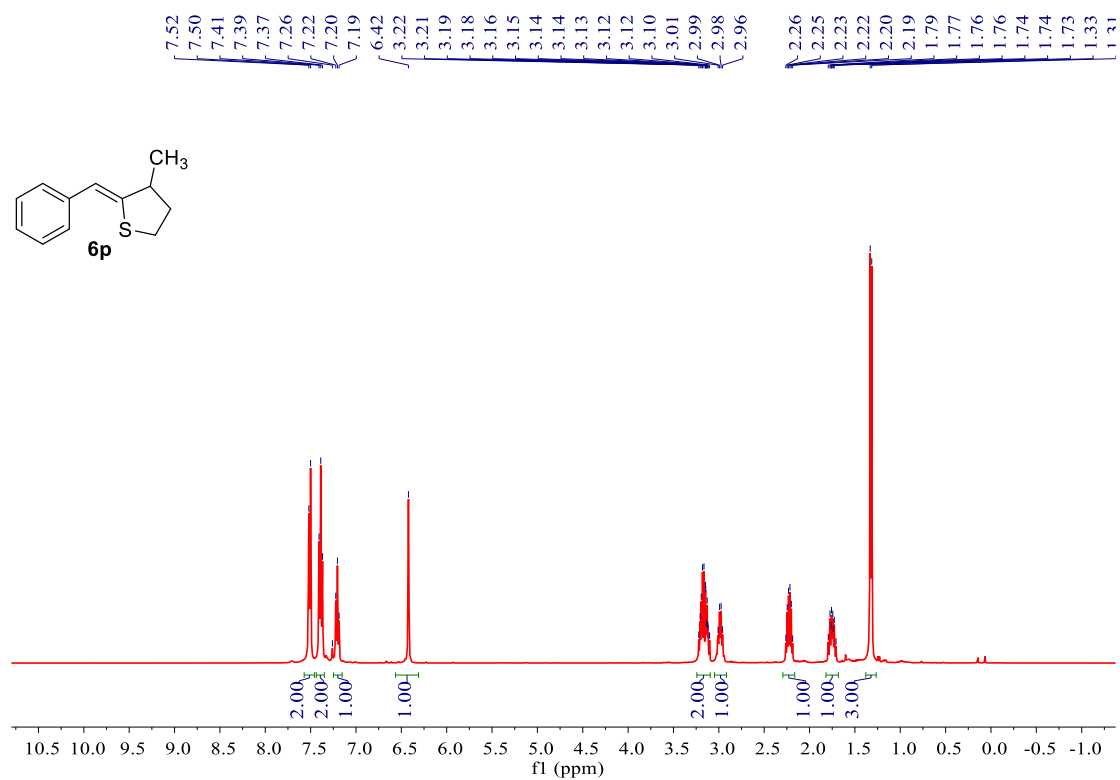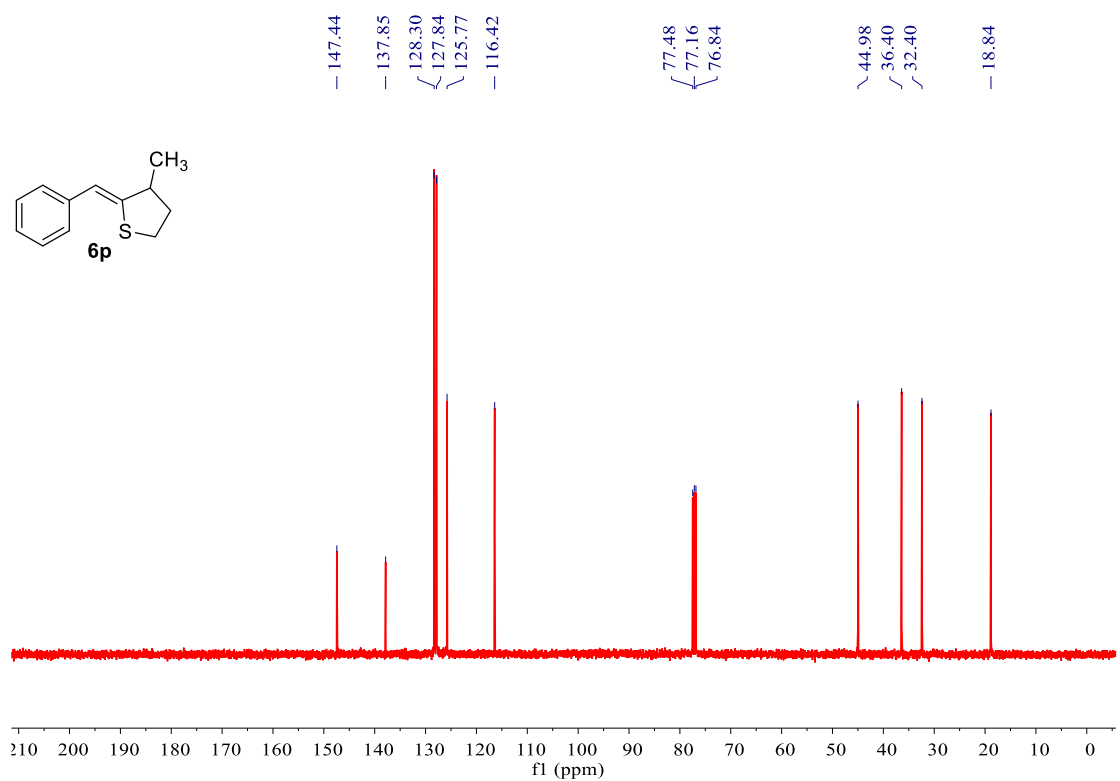



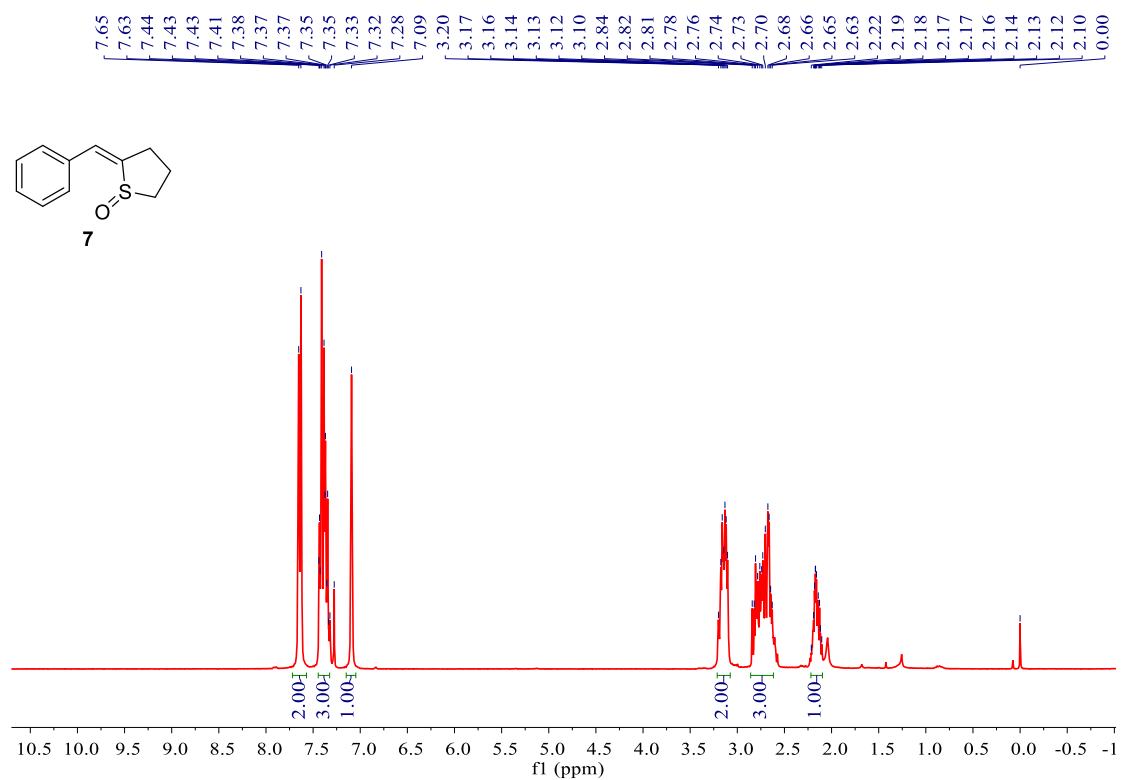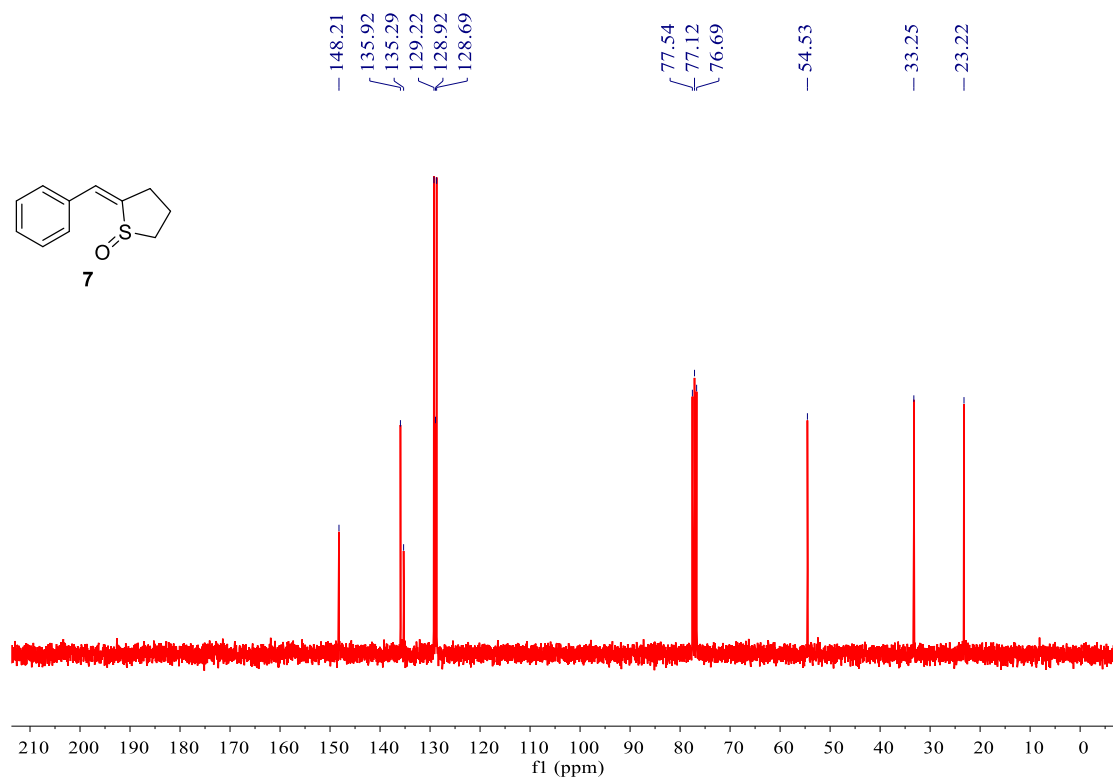

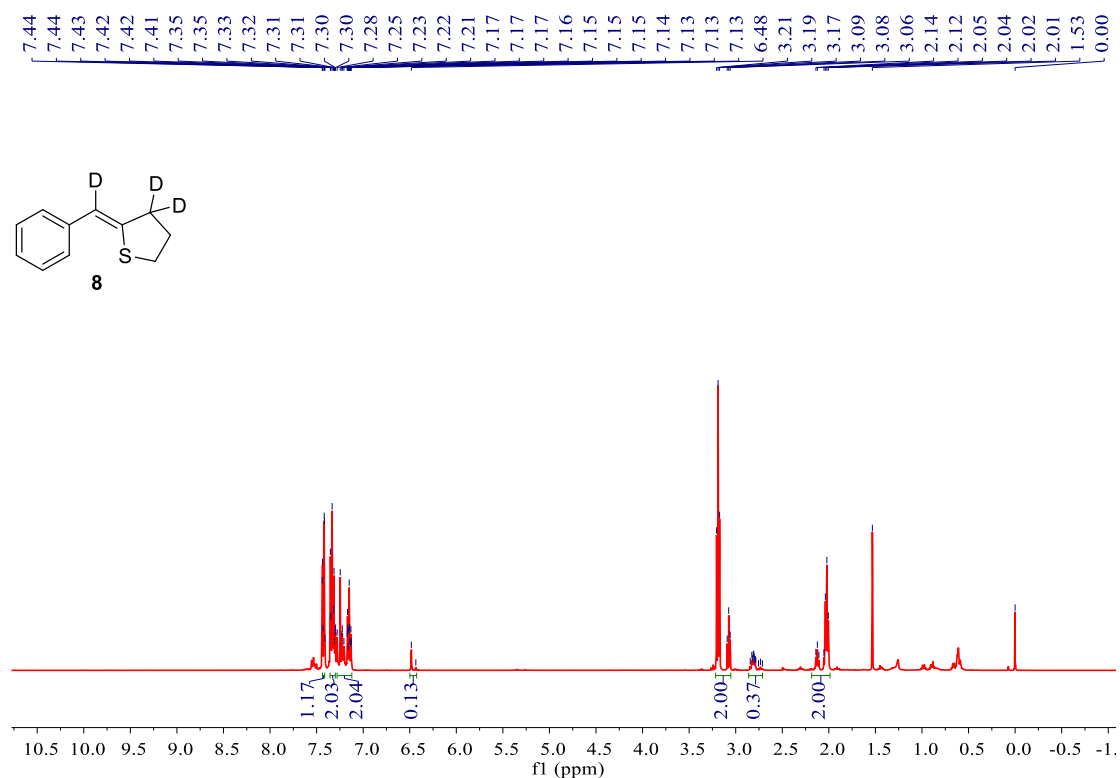

## 12. X-ray Structure of 3a and 7

### 12.1. X-ray Structure of 3a

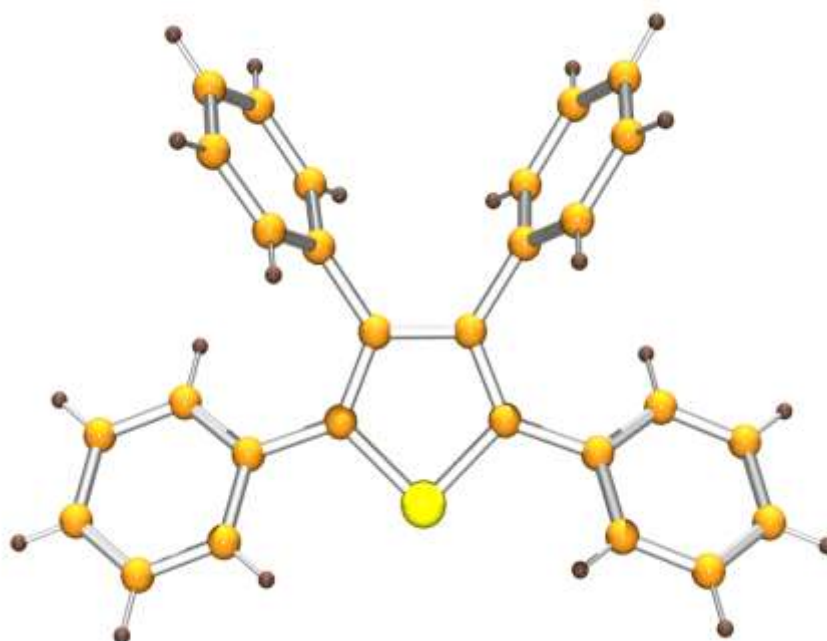

CCDC 1840038 (**3a**) contains the supplementary crystallographic data for this paper. These data can be obtained free of charge from The Cambridge Crystallographic Data Centre.

### 12.2. X-ray Structure of 7

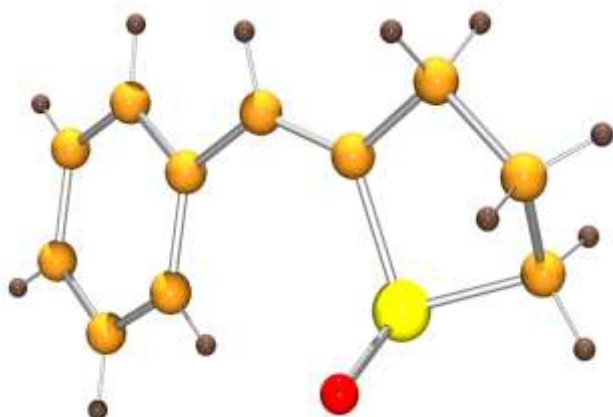

CCDC 1840039 (**7**) contains the supplementary crystallographic data for this paper. These data can be obtained free of charge from The Cambridge Crystallographic Data Centre.
